# Supplementary material for: Assembling diuranium complexes in different states of charge with a bridging redox-active ligand
Source: Royal Society of Chemistry journal article supplement (doi:10.1039/d2sc03592h), 2022-01-01
Supplement: d2sc03592h1.pdf [file d2sc03592h1.pdf]

# Assembling Diuranium Complexes in Different States of Charge with a Bridging Redox-Active Ligand

Dieuwertje K. Modder,<sup>§a</sup> Mikhail S. Batov,<sup>§a</sup> Thayalan Rajeshkumar,<sup>b</sup> Rosario Scopelliti,<sup>a</sup> Ivica Zivkovic,<sup>c</sup> Andrzej Sienkiewicz,<sup>c</sup> Laurent Maron<sup>\*b</sup> and Marinella Mazzanti<sup>a\*</sup>

<sup>a</sup> Institut des Sciences et Ingénierie Chimiques, Ecole Polytechnique Fédérale de Lausanne (EPFL), 1015 Lausanne, Switzerland.

<sup>b</sup> LPCNO, Université de Toulouse, INSA Toulouse, Toulouse, 31077, France.

<sup>c</sup> Laboratory for Quantum Magnetism, Institute of Physics, Ecole Polytechnique Fédérale de Lausanne (EPFL), CH-1015 Lausanne, Switzerland.

E-mail: [marinella.mazzanti@epfl.ch](mailto:marinella.mazzanti@epfl.ch)

§ D.M and M.B contributed equally to the manuscript

\* To whom correspondence should be addressed.

## Supporting Information

### **Contents**

|                                              |    |
|----------------------------------------------|----|
| Experimental data .....                      | 2  |
| NMR Spectra .....                            | 5  |
| X-ray Structure and Refinement Details ..... | 11 |
| Electrochemistry data .....                  | 17 |
| DC magnetic data .....                       | 20 |
| EPR measurements .....                       | 30 |
| AC magnetic data .....                       | 34 |
| Computational data .....                     | 41 |
| References .....                             | 61 |

## Experimental data

### General considerations.

All manipulations were carried out under inert nitrogen/argon atmosphere using an MBraun glovebox equipped with a purifier unit and Schlenk line techniques. The water and oxygen levels were always kept at less than 1 ppm. Anhydrous solvents were purchased from Sigma Aldrich and vacuum distilled under potassium/benzophenone (THF, toluene, Et<sub>2</sub>O) or sodium sand/benzophenone (hexane). Depleted uranium turnings were purchased from IBILABS, Florida (USA). Bipyrimidine was purchased from Sigma Aldrich and used as received after drying under vacuum for 3 days.

[U{N(SiMe<sub>3</sub>)<sub>2</sub>]<sub>3</sub>]<sup>1</sup>, K<sub>8</sub><sup>2</sup> and [K(2.2.2-cryptand)<sub>2</sub>{((Me<sub>3</sub>Si)<sub>2</sub>N)<sub>3</sub>U}<sub>2</sub>(μ-O)]<sup>3</sup> were synthesized according to their respective literature procedures. Elemental analyses were performed under nitrogen with a Thermo Scientific Flash 2000 Organic Elemental Analyzer at EPFL. The elemental analyses were reproduced several times on different batches and under different conditions, always giving low values of carbon for complexes **2** and **4** probably due to combustion issues and/or the formation of silicon carbides. However, the C:H:N ratio's match the expected ones.

<sup>1</sup>H NMR experiments were carried out using NMR tubes adapted with J. Young valves. <sup>1</sup>H NMR spectra were recorded on a Bruker 400 MHz spectrometer and the chemical shifts are reported in ppm with residual proteo-solvent signals used as an internal reference.

Cyclic voltammetry experiments were carried out at room temperature in an argon-filled glovebox described above. Data were collected using a Biologic SP-300 potentiostat connected to a personal computer. All samples were 2 mM in complex with 0.06 M [NBu<sub>4</sub>][BPh<sub>4</sub>] supporting electrolyte in THF solution. The experiments were carried out with a platinum disk (d = 5 mm) working electrode, a platinum wire counter electrode, and an Ag/AgCl reference electrode. The experiments were repeated on independently synthesized samples to assess the reproducibility of the measurement. Potential calibration was performed at the end of each data collection cycle using the decamethylferrocene/decamethylferrocenium [(C<sub>5</sub>Me<sub>5</sub>)<sub>2</sub>Fe]<sup>+0</sup> couple as an internal standard. The values were subsequently adjusted to reflect the values versus the [(C<sub>5</sub>H<sub>5</sub>)<sub>2</sub>Fe]<sup>+0</sup> couple assuming that [(C<sub>5</sub>Me<sub>5</sub>)<sub>2</sub>Fe]<sup>+0</sup> appears at -0.59 V with respect to [(C<sub>5</sub>H<sub>5</sub>)<sub>2</sub>Fe]<sup>+0</sup>.

Electron paramagnetic resonance (EPR) measurements were recorded with a Bruker Elexsys E500 spectrometer operating in the X-band frequency region with an Oxford ESR900 cryostat for 4-300 K operation. The complexes were ground in an agate mortar. 5 mmol were loaded in 1 mm diameter quartz capillaries and then inserted into J-Young valve EPR tubes. The measurements were reproduced from at least two different synthetic batches.

Magnetic measurements were performed using a QuantumDesign MPMS3 system operating at temperatures 2–300 K. Quartz tubes were charged with solid samples of each complex, which were ground using an agate mortar and pestle. Solid eicosane was added,

and the tubes were fit with a Teflon sealable adapter, evacuated under vacuum, and flame-sealed under static vacuum. Following flame sealing, the solid eicosane was melted in a water bath at 40 °C, and the mixture was immediately cooled with an ice bath. Diamagnetic corrections were applied to the data using tabulated Pascal constants.<sup>4</sup> The measurements were reproduced from at least two different synthetic batches. The samples were vacuum dried before the measurements to remove solvents.

AC measurements were performed using the same experimental setup in the range of frequencies up to 1 kHz under the applied field of 0.2 T. Relaxation parameters for **2** and **4** were extracted by least squares fitting of the Argand (Cole-Cole) plots using the generalised Debye model<sup>5</sup>. For compound **3** no maximum was observed on the Argand plot and therefore no further analysis was attempted. The energy barrier values for **2** and **4** were obtained from the linear fit of the Arrhenius plot ( $\ln(\tau)$  against  $1/T$ )<sup>5</sup>. Attempts to include Raman or direct processes in the fit did not yield a better fit.

**Caution:** Depleted uranium (primary isotope  $^{238}\text{U}$ ) is a weak  $\alpha$ -emitter (4.197 MeV) with a half-life of  $4.47 \times 10^9$  years. Manipulations and reactions should be carried out in monitored fume hoods or in an inert atmosphere glovebox in a radiation laboratory equipped with  $\alpha$ - and  $\beta$ -counting equipment.

### Syntheses.

**[{((Me<sub>3</sub>Si)<sub>2</sub>N)<sub>3</sub>U}<sub>2</sub>( $\mu$ -bpym)] (1).** A solution of 2,2'-bipyrimidine (109.9 mg, 0.695 mmol, 1 eq) in THF (1 mL) was added to a purple solution of [U{N(SiMe<sub>3</sub>)<sub>2</sub>}<sub>3</sub>] (1000 mg, 1.39 mmol, 2 eq) in THF (1 mL). An immediate color change to dark green/brown, as well as the formation of a crystalline precipitate was observed. The reaction mixture was stirred for 2h at room temperature. Then the green precipitate was collected by filtration, washed with hexane (2x3 mL) and Et<sub>2</sub>O (2x3 mL) until washings were colorless, and dried under vacuum for 30 minutes, to yield a light green solid (686.2 mg, 62%). Complex **1** is insoluble in hexane and Et<sub>2</sub>O and only slightly soluble in toluene and THF. Anal. Calcd. for C<sub>44</sub>H<sub>114</sub>N<sub>10</sub>Si<sub>12</sub>U<sub>2</sub>: C, 33.10; H, 7.20; N, 8.77. Found: C, 33.10; H, 7.39; N, 8.52. <sup>1</sup>H-NMR (400 MHz, THF-*d*<sub>8</sub>, 298K):  $\delta$  33.98 (s), -7.70 (br s) and -23.48 (br s). X-ray quality crystals were obtained by carrying out the reaction on a small scale (10 mg of [U{N(SiMe<sub>3</sub>)<sub>2</sub>}<sub>3</sub>]) and crystallize out upon addition of 2,2'-bipyrimidine without stirring.

**[K(2.2.2-cryptand)][{((Me<sub>3</sub>Si)<sub>2</sub>N)<sub>3</sub>U}<sub>2</sub>( $\mu$ -bpym)] (2).** A suspension of **1** (100 mg, 0.063 mmol, 1 eq) and 2.2.2-cryptand (23.6 mg, 0.063 mol, 1 eq) in THF (1 mL) was added to K<sub>2</sub>C<sub>8</sub> (8.5 mg, 0.063 mmol, 1 eq). After stirring at room temperature for 2h, the color changed from light green to black-green. The mixture was filtered, affording a dark brown solution. All volatiles were removed under vacuum and diffusion of hexane into a concentrated Et<sub>2</sub>O solution -40 °C for 5 days resulted in the formation of X-ray suitable black crystals (92.7 mg,

73%) which were subsequently washed with additional hexane (1x2 ml) and dried under vacuum for 30 minutes. Anal. Calcd. for  $C_{62}H_{150}KN_{12}O_6Si_{12}U_2$ : C, 37.01; H, 7.51; N, 8.35. Found: C, 34.76; H, 6.94; N, 7.85.  $^1H$ -NMR (400 MHz, THF- $d_8$ , 298K):  $\delta$  13.05 (s), 3.57 (s, 2.2.2-cryptand), 3.53 (s, 2.2.2-cryptand), 2.54 (s, 2.2.2-cryptand), -8.80 (br s).

**[K(2.2.2-cryptand)]<sub>2</sub>{[(Me<sub>3</sub>Si)<sub>2</sub>N]<sub>3</sub>U}<sub>2</sub>( $\mu$ -bpym)] (3). From [K(2.2.2-cryptand)]<sub>2</sub>{[(Me<sub>3</sub>Si)<sub>2</sub>N]<sub>3</sub>U}<sub>2</sub>( $\mu$ -O)] NMR scale. A (-80 °C) solution of bipyrimidine (0.8 mg, 5.1  $\mu$ mol, 1.2 eq) in THF- $d_8$  (0.5 mL) was added to [K(2.2.2-cryptand)]<sub>2</sub>{[(Me<sub>3</sub>Si)<sub>2</sub>N]<sub>3</sub>U}<sub>2</sub>( $\mu$ -O)] (9.9 mg, 4.3  $\mu$ mol, 1.0 eq), resulting in a dark brown solution. The variable temperature  $^1H$ -NMR spectra showed complete conversion of the starting materials at -80 °C and the formation of the side product [K(2.2.2-cryptand)][U(O){N(SiMe<sub>3</sub>)<sub>2</sub>]<sub>3</sub>] and at 0 °C the formation of complex **3** was observed (complex **3** is silent at lower temperatures). **From complex 1.** A suspension of **1** (100 mg, 0.062 mmol, 1 eq) and 2.2.2-cryptand (47 mg, 0.125 mol, 2 eq) in THF (1 mL) was added to KC<sub>8</sub> (16.9 mg, 0.125 mmol, 2 eq). After stirring for 2h at room temperature, the black reaction mixture was filtered and all volatiles were removed under vacuum. The residue was dissolved in minimal Et<sub>2</sub>O and the resulting solution was cooled to -40 °C, affording dark brown crystals suitable for X-ray diffraction. The crystals were collected and dried under vacuum for 30 minutes. Anal. Calcd. for  $C_{80}H_{186}K_2N_{14}O_{12}Si_{12}U_2$ : C, 39.58; H, 7.72; N, 8.08. Found: C, 39.12; H, 7.42; N, 8.26.  $^1H$ -NMR (400 MHz, THF- $d_8$ , 298K):  $\delta$  12.79 (s), 3.48 (s, 2.2.2-cryptand), 3.45 (s, 2.2.2-cryptand), 2.46 (s, 2.2.2-cryptand), -7.37 (br s).**

**{[(Me<sub>3</sub>Si)<sub>2</sub>N]<sub>3</sub>U}<sub>2</sub>( $\mu$ -bpym)][BPh<sub>4</sub>] (4).** An off-white suspension of AgBPh<sub>4</sub> (53.4 mg, 0.125 mmol, 1 eq) in THF (1 mL) was added to a stirring suspension of **1** (200 mg, 0.125 mmol, 1 eq) in THF (1 mL) and stirred at room temperature for 3h, resulting in a dark brown mixture. The mixture was filtered and slow diffusion of hexane into the THF reaction mixture at -40 °C over 3 days afforded X-ray quality brown crystals. The resulting brown crystals were washed with toluene (3x2 ml) and hexane (3x2 ml) and dried under vacuum for 30 minutes to yield complex **4** (148.6 mg, 62%) as a brown powder.  $^1H$ -NMR (400 MHz, THF- $d_8$ , 298K):  $\delta$  7.42, 6.97 and 6.77 (all s, 20H, BPh<sub>4</sub>), -21.46 and -24.84 (two s, broad, 54H, NSiMe<sub>3</sub>). Anal. Calcd. for  $C_{68}H_{134}BN_{10}Si_{12}U_2$ : C, 42.63; H, 7.05; N, 7.31. Found: C, 41.71; H, 6.37; N, 6.96. For **5**,  $^1H$ -NMR (400 MHz, THF- $d_8$ , 298K):  $\delta$  7.48 (s, BPh<sub>4</sub>), 6.90 (s, BPh<sub>4</sub>), 6.56 (s, BPh<sub>4</sub>), -13.49 (s) and -19.51 (s).

## NMR Spectra

- 1
- H-HMDS
- $d_8$ -THF

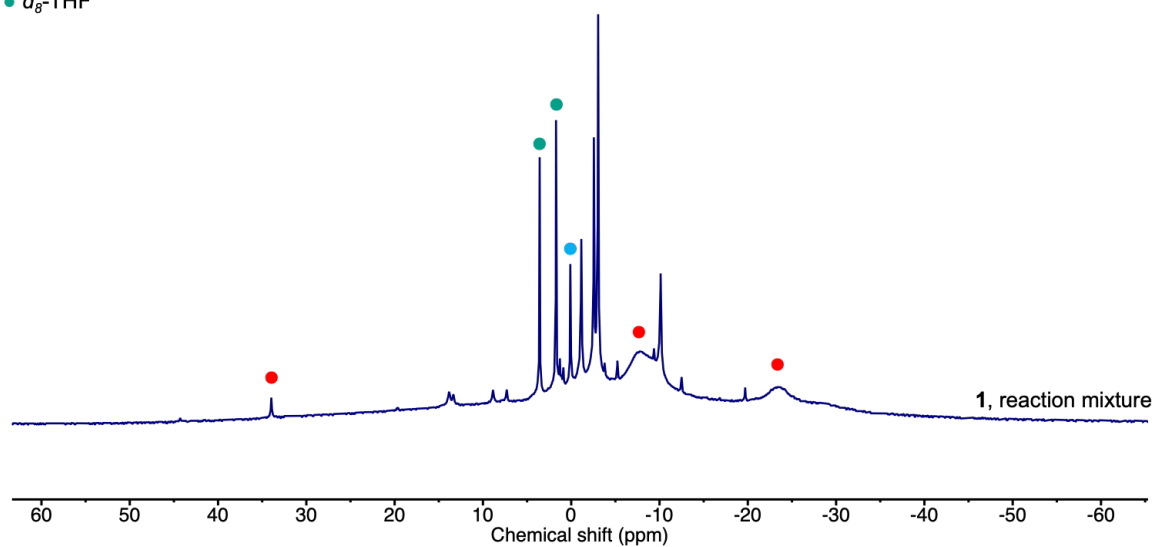

**Figure S1** Room temperature  $^1\text{H-NMR}$  spectrum of reaction mixture in  $\text{THF-}d_8$  of the reaction mixture of  $[\text{U}\{\text{N}(\text{SiMe}_3)_2\}_3]$  and 0.5 equivalents of 2,2'-bipyrimidine, forming complex **1**.

- 1
- benzene
- $d_8$ -THF
- hexane
- H-HMDS

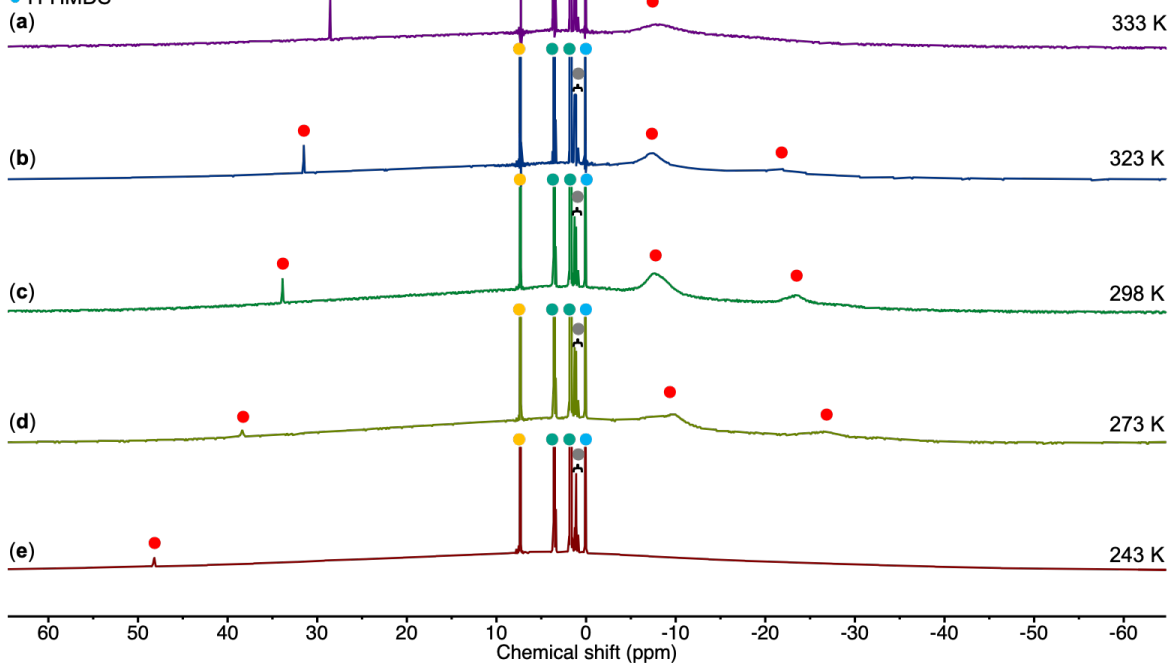

**Figure S2** Variable temperature  $^1\text{H-NMR}$  spectra of crystals of **1** in  $\text{THF-}d_8$  (a-e).

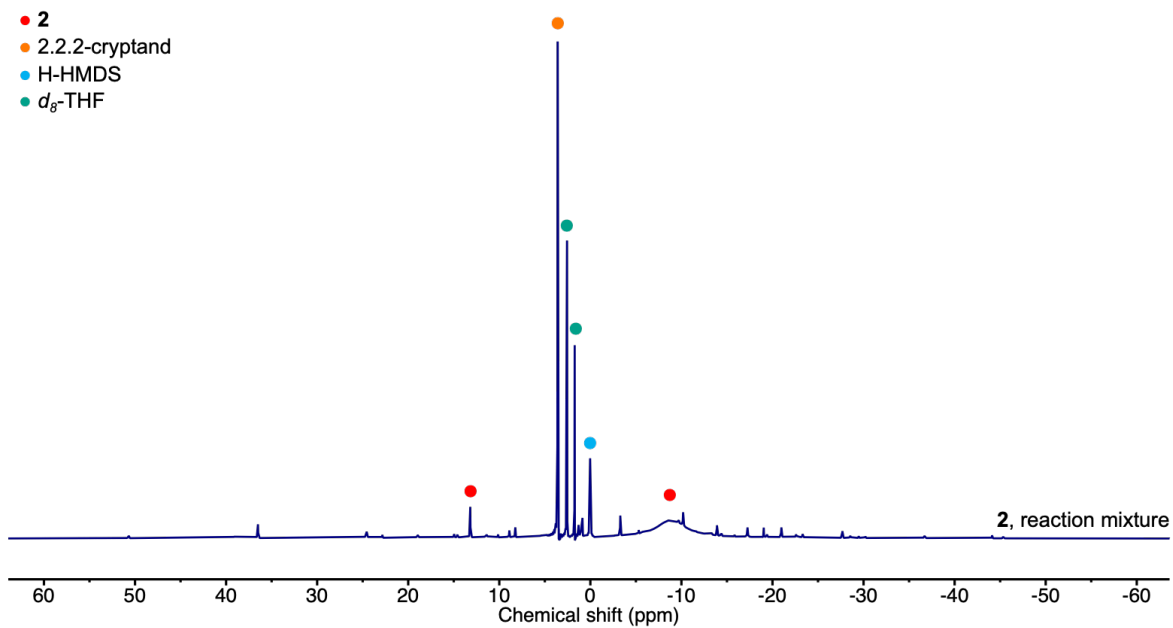

**Figure S3** Room temperature  $^1\text{H-NMR}$  spectrum of the reaction mixture in  $\text{THF-}d_8$  of complex **1** with 1 equivalent of  $\text{KC}_8$  and 1 equivalent of 2.2.2-cryptand, forming complex **2**.

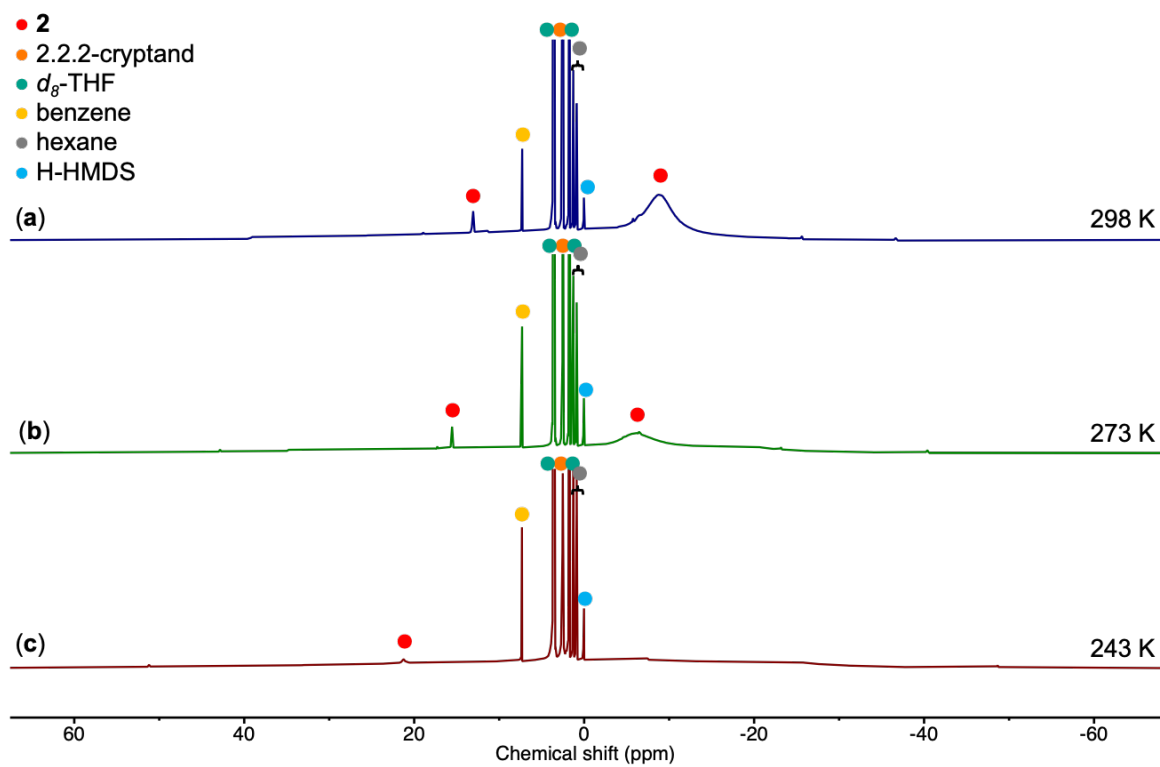

**Figure S4** Variable temperature  $^1\text{H-NMR}$  spectra of crystals of **2** in  $\text{THF-}d_8$  (a-c).

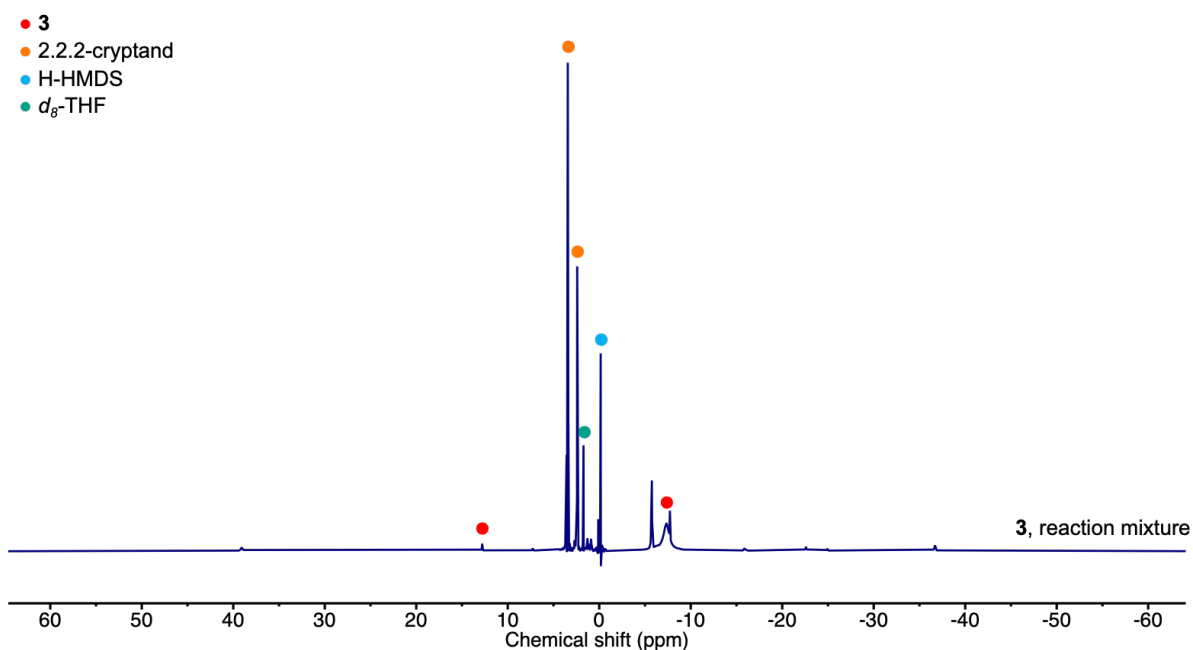

**Figure S5** Room temperature  $^1\text{H-NMR}$  spectrum of the reaction mixture in  $\text{THF-}d_8$  of complex **1** with 2 equivalents of  $\text{KC}_8$  and 2 equivalents of 2.2.2-cryptand, forming complex **3**.

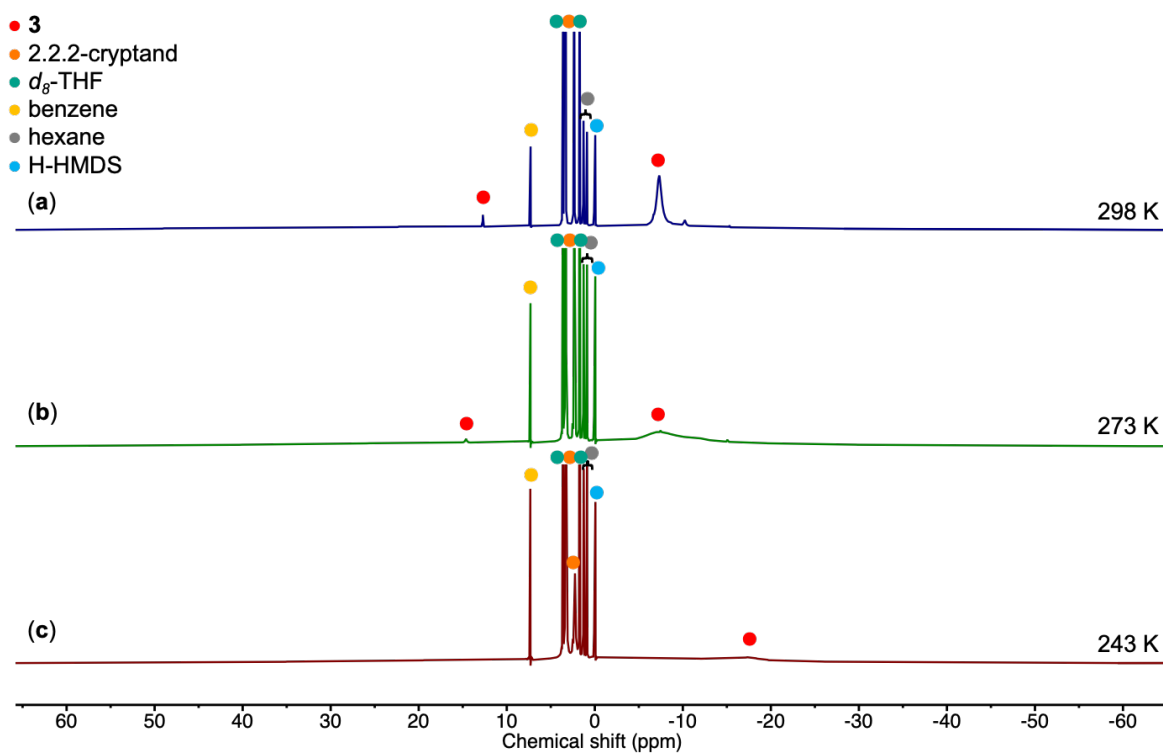

**Figure S6** Variable temperature  $^1\text{H-NMR}$  spectra of crystals of **3** in  $\text{THF-}d_8$  (a-c).

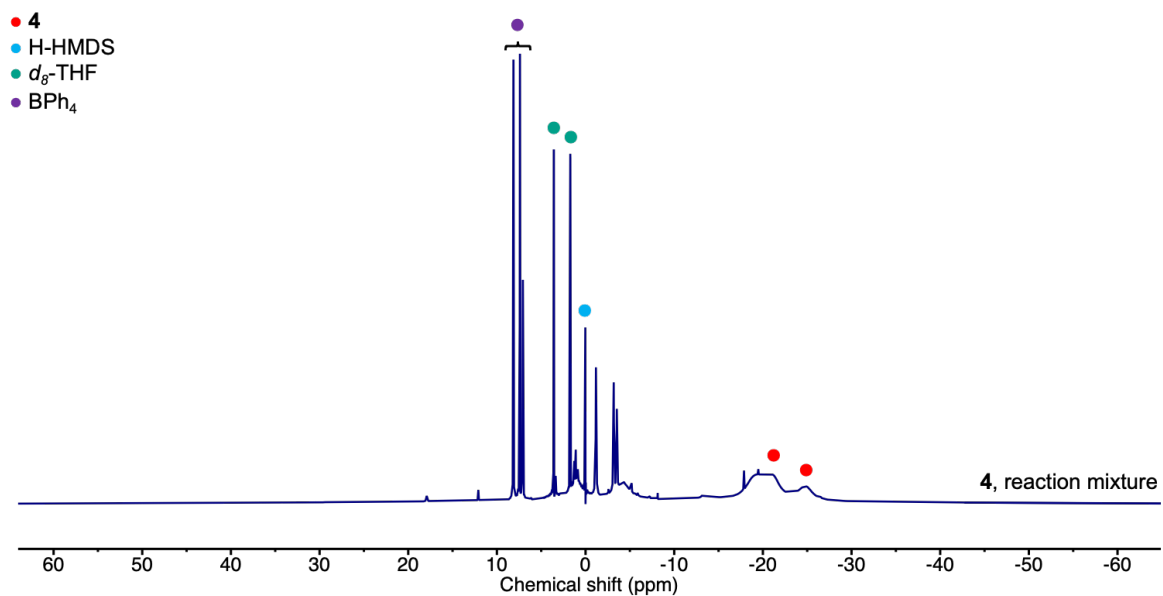

**Figure S7** Room temperature  $^1H$ -NMR spectrum of the reaction mixture in  $THF-d_8$  of complex **1** and  $AgBPh_4$ , forming complex **4**.

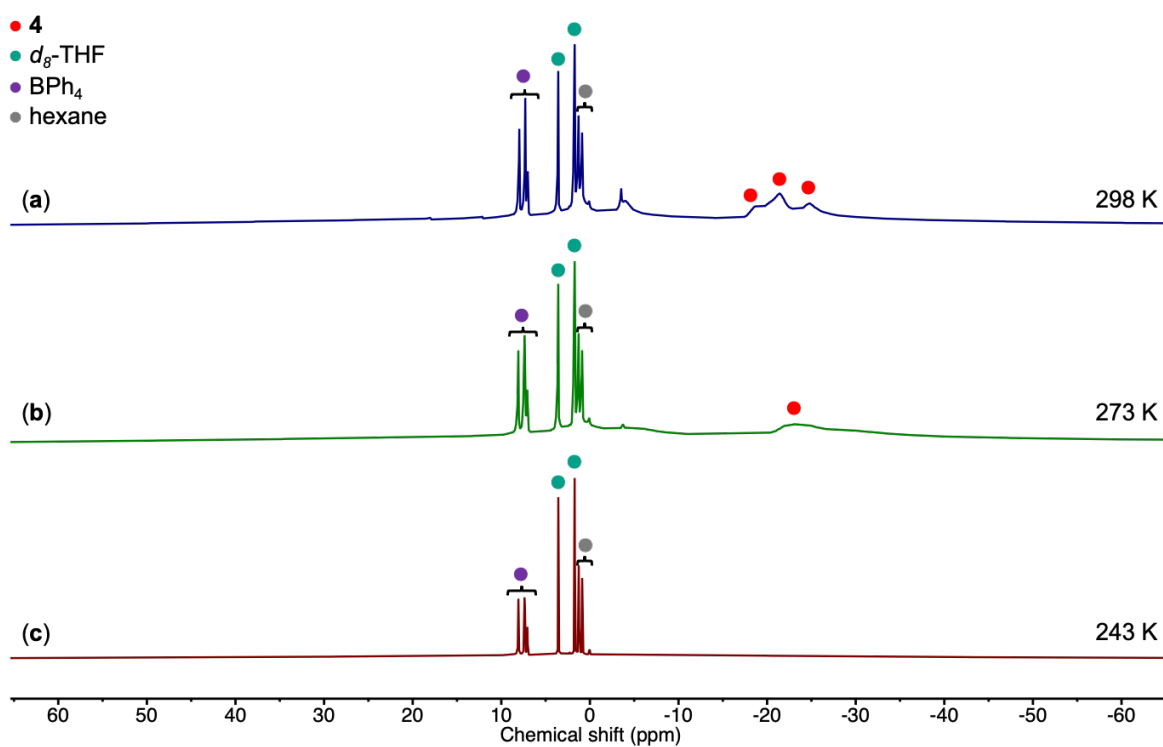

**Figure S8** Variable temperature  $^1H$ -NMR spectra of crystals of **4** in  $THF-d_8$  (a-c).



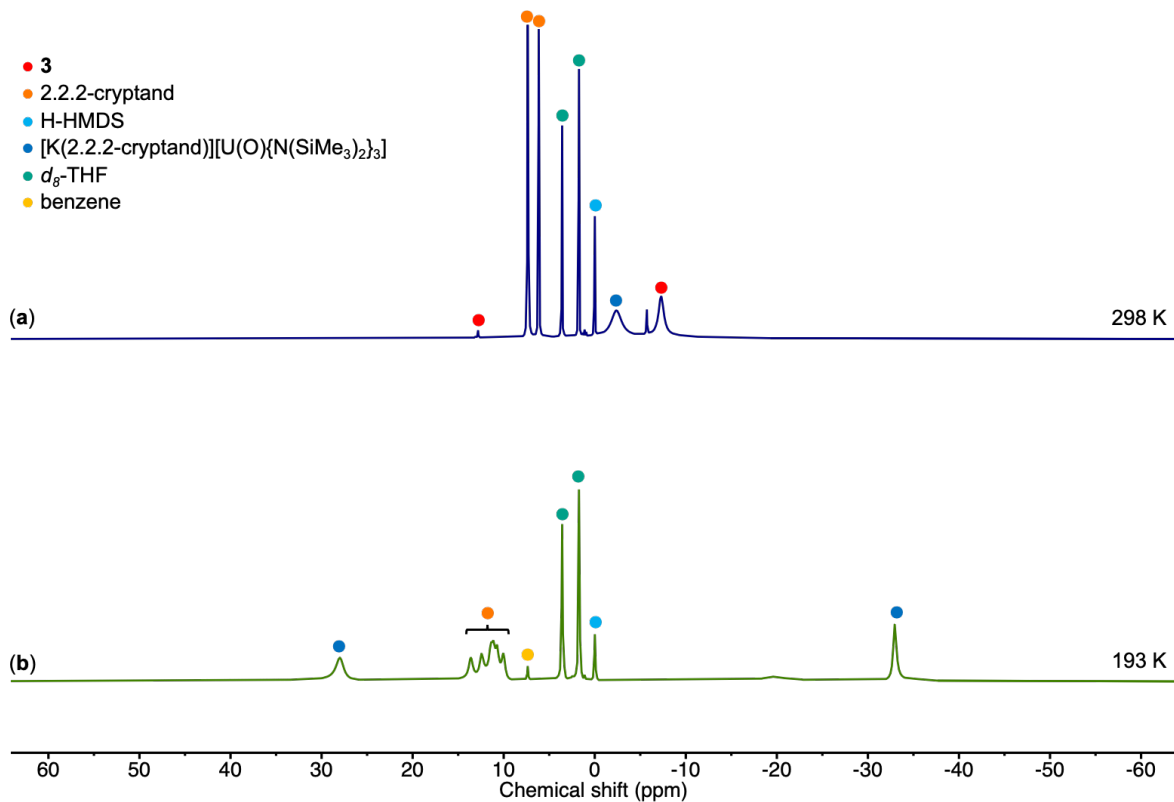

**Figure S9**  $^1\text{H-NMR}$  spectra of reaction mixture of  $[\text{K}(2.2.2\text{-cryptand})]_2\{((\text{Me}_3\text{Si})_2\text{N})_3\text{U}\}_2(\mu\text{-O})$  with 1 equivalent of 2,2'-bipyrimidine in  $\text{THF-}d_8$  yielding **3**, along with the side-product  $[\text{K}(2.2.2\text{-cryptand})][\text{U}(\text{O})\{\text{N}(\text{SiMe}_3)_2\}_3]$  (a-b).

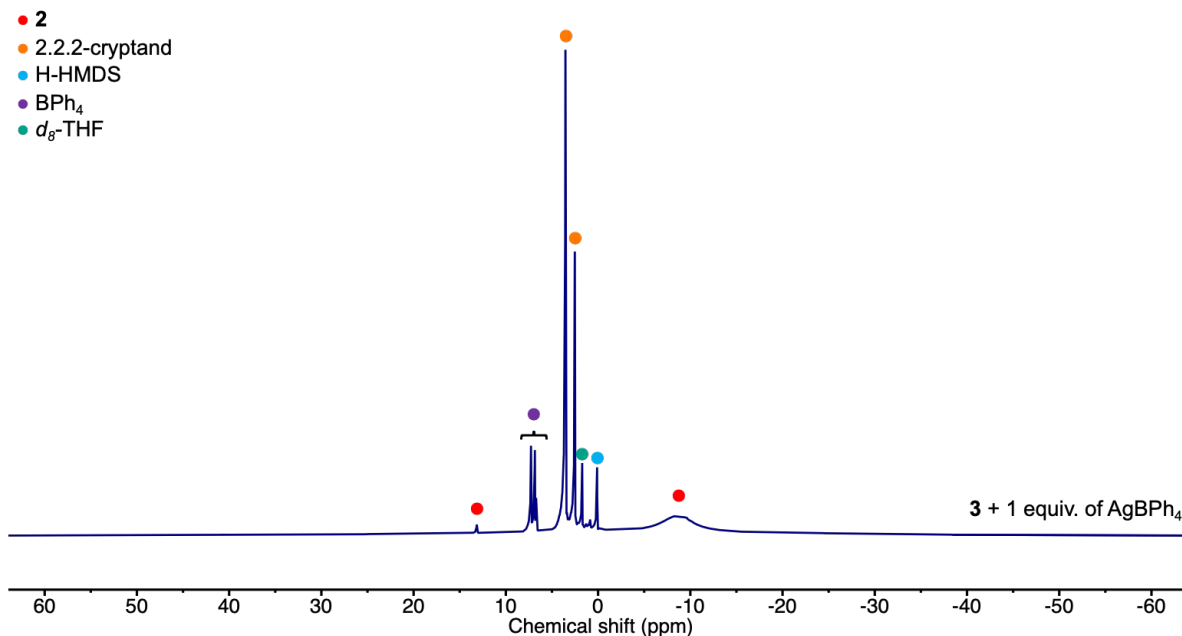

**Figure S10**  $^1\text{H-NMR}$  spectra of reaction mixture of **3** with 1 equivalent of  $\text{AgBPh}_4$  in  $\text{THF-}d_8$  yielding **2**.

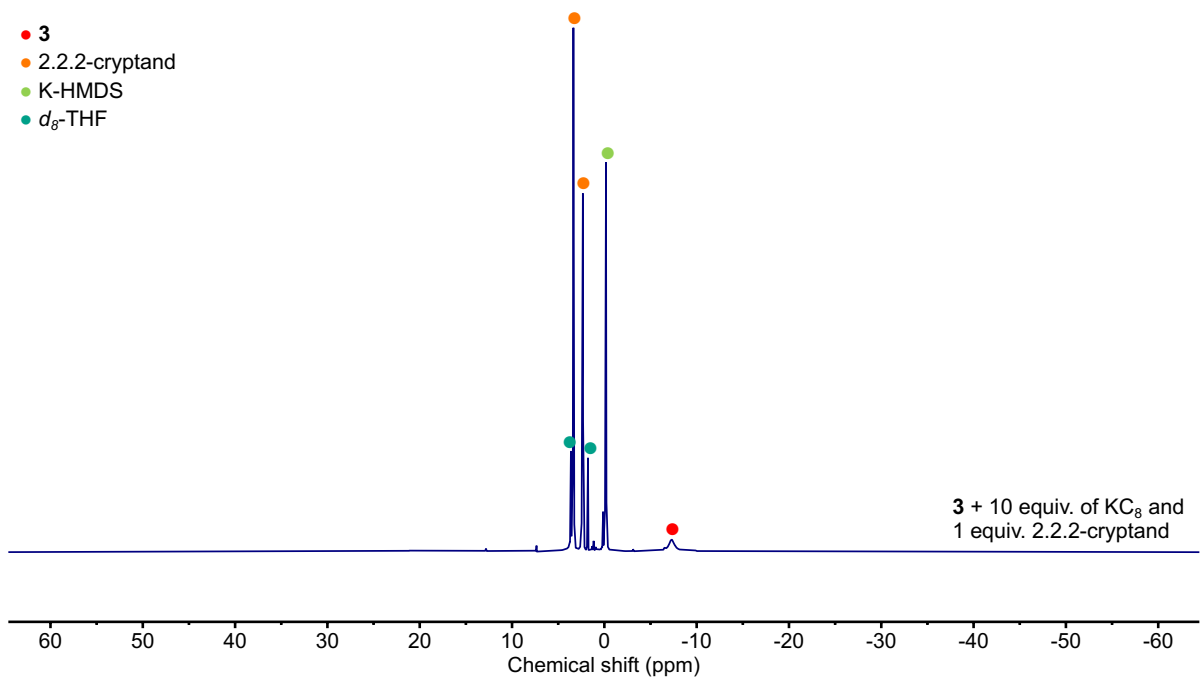

**Figure S11**  $^1H$ -NMR spectrum of reaction mixture of **3** with 10 equivalents of  $KC_8$  and 1 equiv. 2.2.2-cryptand in  $THF-d_8$  resulting in the partial decomposition of **3** to K-HMDS.

## X-ray Structure and Refinement Details

Suitable crystals were selected and mounted on various Rigaku diffractometers (XtaLAB Synergy R, DW system, HyPix-Arc 150 detector or SuperNova, Dual, Cu at home/near, AtlasS type detectors). The crystals were kept at a steady  $T = 140.00(10)$  K during data collection. Data were measured using  $\omega$  scans with Cu  $K\alpha$  radiation. The diffraction patterns were indexed and the total number of runs and images were based on the strategy calculation from the program CrysAlisPro 1.171.41.118a (Rigaku OD, 2021).<sup>6</sup> The unit cells were refined using CrysAlisPro 1.171.41.118a (Rigaku OD, 2021). Data reduction, scaling and absorption corrections were performed using CrysAlisPro 1.171.41.118a (Rigaku OD, 2021).

The structures were solved with the **ShelXT**<sup>7</sup> (Sheldrick, 2015) solution program using dual methods and by using **Olex2** 1.5<sup>8</sup> as the graphical interface. The models were refined with **ShelXL**<sup>9</sup> 2018/3 using full matrix least squares minimisation on  $F^2$ . All non-hydrogen atoms were refined anisotropically. Some hydrogen atom positions were calculated geometrically and refined using the riding model, but most hydrogen atoms were refined freely.

Several structures displayed problems dealing with disorder (disordered ligands or solvent) or twinning. In particular, the crystal structure of compound **1** was treated for twinning (2 BASF parameters (0.144(1); 0.377(2)) were refined during the last cycles of least-squares) and the solvent was removed from the model (using Olex2). For compound **2** several restraints (cards: SADI, DFIX, RIGU, ISOR) were needed to adjust the atomic parameters of the  $K(\text{crypt})^+$  and the solvent (0.5 hexane) was squeezed in the last stages of the refinement (using Olex2). The crystal structure of compound **4** showed one disordered ligand and restraints were used for its refinement (cards: SADI, SIMU, RIGU), solvent too was highly disordered and it was removed from the model (using Olex2). In the case of compound **5**, the solvent was removed from the model (using Olex2).

**Table S1** X-ray data for complexes **1-4**.

| <b>Complex</b>                                 | <b>1</b>                                                                         | <b>2</b>                                                                                         | <b>3</b>                                                                                                        | <b>4</b>                                                                          |
|------------------------------------------------|----------------------------------------------------------------------------------|--------------------------------------------------------------------------------------------------|-----------------------------------------------------------------------------------------------------------------|-----------------------------------------------------------------------------------|
| Formula                                        | C <sub>44</sub> H <sub>114</sub> N <sub>10</sub> Si <sub>12</sub> U <sub>2</sub> | C <sub>62</sub> H <sub>150</sub> KN <sub>12</sub> O <sub>6</sub> Si <sub>12</sub> U <sub>2</sub> | C <sub>96</sub> H <sub>226</sub> K <sub>2</sub> N <sub>14</sub> O <sub>16</sub> Si <sub>12</sub> U <sub>2</sub> | C <sub>71</sub> H <sub>141</sub> BN <sub>10</sub> Si <sub>12</sub> U <sub>2</sub> |
| <i>D</i> <sub>calc.</sub> / g cm <sup>-3</sup> | 1.333                                                                            | 1.308                                                                                            | 1.332                                                                                                           | 1.203                                                                             |
| <i>m</i> /mm <sup>-1</sup>                     | 13.339                                                                           | 10.903                                                                                           | 8.674                                                                                                           | 9.910                                                                             |
| Formula Weight                                 | 1596.59                                                                          | 2012.17                                                                                          | 2724.23                                                                                                         | 1958.88                                                                           |
| Colour                                         | clear dark green                                                                 | black                                                                                            | clear dark brown                                                                                                | black                                                                             |
| Shape                                          | prism                                                                            | irregular                                                                                        | irregular                                                                                                       | prism-shaped                                                                      |
| Size/mm <sup>3</sup>                           | 0.26×0.11×0.10                                                                   | 0.31×0.07×0.05                                                                                   | 0.27×0.14×0.11                                                                                                  | 0.41×0.15×0.11                                                                    |
| <i>T</i> /K                                    | 140.00(10)                                                                       | 140.00(10)                                                                                       | 139.9(9)                                                                                                        | 140.00(10)                                                                        |
| Crystal System                                 | monoclinic                                                                       | monoclinic                                                                                       | triclinic                                                                                                       | triclinic                                                                         |
| Space Group                                    | <i>I</i> 2/ <i>a</i>                                                             | <i>I</i> 2/ <i>a</i>                                                                             | <i>P</i> $\bar{1}$                                                                                              | <i>P</i> -1                                                                       |
| <i>a</i> /Å                                    | 24.4164(5)                                                                       | 29.9688(16)                                                                                      | 13.78160(13)                                                                                                    | 15.1222(2)                                                                        |
| <i>b</i> /Å                                    | 11.4199(2)                                                                       | 11.6805(5)                                                                                       | 16.73893(18)                                                                                                    | 15.2178(2)                                                                        |
| <i>c</i> /Å                                    | 29.7959(6)                                                                       | 32.306(3)                                                                                        | 17.00630(17)                                                                                                    | 23.8147(4)                                                                        |
| <i>a</i> <sup>o</sup>                          | 90                                                                               | 90                                                                                               | 63.8536(11)                                                                                                     | 98.8987(12)                                                                       |
| <i>b</i> <sup>o</sup>                          | 106.683(2)                                                                       | 115.332(9)                                                                                       | 84.3138(8)                                                                                                      | 91.1267(12)                                                                       |
| <i>g</i> <sup>o</sup>                          | 90                                                                               | 90                                                                                               | 74.6504(9)                                                                                                      | 92.6498(13)                                                                       |
| <i>V</i> /Å <sup>3</sup>                       | 7958.4(3)                                                                        | 10221.3(14)                                                                                      | 3395.39(7)                                                                                                      | 5406.63(14)                                                                       |
| <i>Z</i>                                       | 4                                                                                | 4                                                                                                | 1                                                                                                               | 2                                                                                 |
| <i>Z</i> '                                     | 0.5                                                                              | 0.5                                                                                              | 0.5                                                                                                             | 1                                                                                 |
| Wavelength/Å                                   | 1.54184                                                                          | 1.54184                                                                                          | 1.54184                                                                                                         | 1.54184                                                                           |
| Radiation type                                 | Cu K $\alpha$                                                                    | Cu K $\alpha$                                                                                    | Cu K $\alpha$                                                                                                   | Cu K $\alpha$                                                                     |
| <i>Q</i> <sub>min</sub> <sup>o</sup>           | 4.143                                                                            | 3.027                                                                                            | 2.895                                                                                                           | 2.926                                                                             |
| <i>Q</i> <sub>max</sub> <sup>o</sup>           | 72.828                                                                           | 73.679                                                                                           | 76.054                                                                                                          | 76.884                                                                            |
| Measured Refl's.                               | 9407                                                                             | 37255                                                                                            | 40729                                                                                                           | 66393                                                                             |
| Ind't Refl's                                   | 9407                                                                             | 10025                                                                                            | 14025                                                                                                           | 22270                                                                             |
| Refl's with <i>I</i> > 2 $\sigma$ ( <i>I</i> ) | 8306                                                                             | 6715                                                                                             | 13728                                                                                                           | 17947                                                                             |
| <i>R</i> <sub>int</sub>                        | .                                                                                | 0.0827                                                                                           | 0.0276                                                                                                          | 0.0426                                                                            |
| Parameters                                     | 327                                                                              | 447                                                                                              | 662                                                                                                             | 990                                                                               |
| Restraints                                     | 0                                                                                | 446                                                                                              | 0                                                                                                               | 385                                                                               |
| Largest Peak                                   | 1.408                                                                            | 2.844                                                                                            | 1.510                                                                                                           | 1.842                                                                             |
| Deepest Hole                                   | -1.839                                                                           | -2.447                                                                                           | -1.402                                                                                                          | -1.573                                                                            |
| GooF                                           | 1.018                                                                            | 1.019                                                                                            | 1.021                                                                                                           | 1.021                                                                             |
| <i>wR</i> <sub>2</sub> (all data)              | 0.0879                                                                           | 0.2502                                                                                           | 0.0536                                                                                                          | 0.1041                                                                            |
| <i>wR</i> <sub>2</sub>                         | 0.0861                                                                           | 0.2026                                                                                           | 0.0532                                                                                                          | 0.0959                                                                            |
| <i>R</i> <sub>1</sub> (all data)               | 0.0359                                                                           | 0.1091                                                                                           | 0.0227                                                                                                          | 0.0551                                                                            |
| <i>R</i> <sub>1</sub>                          | 0.0320                                                                           | 0.0771                                                                                           | 0.0221                                                                                                          | 0.0411                                                                            |
| CCDC                                           | 2181473                                                                          | 2181474                                                                                          | 2181478                                                                                                         | 2181475                                                                           |

**Table S1** continued.

| <b>Complex</b>                                 | <b>5</b>                                                        |
|------------------------------------------------|-----------------------------------------------------------------|
| Formula                                        | C <sub>34</sub> H <sub>48</sub> KN <sub>10</sub> O <sub>6</sub> |
| <i>D</i> <sub>calc.</sub> / g cm <sup>-3</sup> | 1.175                                                           |
| <i>m</i> /mm <sup>-1</sup>                     | 1.551                                                           |
| Formula Weight                                 | 731.92                                                          |
| Colour                                         | black                                                           |
| Shape                                          | irregular-shaped                                                |
| Size/mm <sup>3</sup>                           | 0.16×0.13×0.12                                                  |
| <i>T</i> /K                                    | 140.01(10)                                                      |
| Crystal System                                 | monoclinic                                                      |
| Space Group                                    | <i>C</i> 2/ <i>c</i>                                            |
| <i>a</i> /Å                                    | 15.3683(13)                                                     |
| <i>b</i> /Å                                    | 20.5260(10)                                                     |
| <i>c</i> /Å                                    | 14.6910(10)                                                     |
| <i>a</i> <sup>°</sup>                          | 90                                                              |
| <i>b</i> <sup>°</sup>                          | 116.777(9)                                                      |
| <i>g</i> <sup>°</sup>                          | 90                                                              |
| <i>V</i> /Å <sup>3</sup>                       | 4137.3(6)                                                       |
| <i>Z</i>                                       | 4                                                               |
| <i>Z</i> '                                     | 0.5                                                             |
| Wavelength/Å                                   | 1.54184                                                         |
| Radiation type                                 | Cu K <sub>α</sub>                                               |
| <i>Q</i> <sub>min</sub> <sup>°</sup>           | 3.875                                                           |
| <i>Q</i> <sub>max</sub> <sup>°</sup>           | 72.755                                                          |
| Measured Refl's.                               | 16648                                                           |
| Ind't Refl's                                   | 4046                                                            |
| Refl's with <i>I</i> > 2σ( <i>I</i> )          | 3014                                                            |
| <i>R</i> <sub>int</sub>                        | 0.0364                                                          |
| Parameters                                     | 241                                                             |
| Restraints                                     | 2                                                               |
| Largest Peak                                   | 0.331                                                           |
| Deepest Hole                                   | -0.212                                                          |
| GooF                                           | 1.027                                                           |
| <i>wR</i> <sub>2</sub> (all data)              | 0.1259                                                          |
| <i>wR</i> <sub>2</sub>                         | 0.1144                                                          |
| <i>R</i> <sub>1</sub> (all data)               | 0.0591                                                          |
| <i>R</i> <sub>1</sub>                          | 0.0420                                                          |
| CCDC                                           | 2181476                                                         |

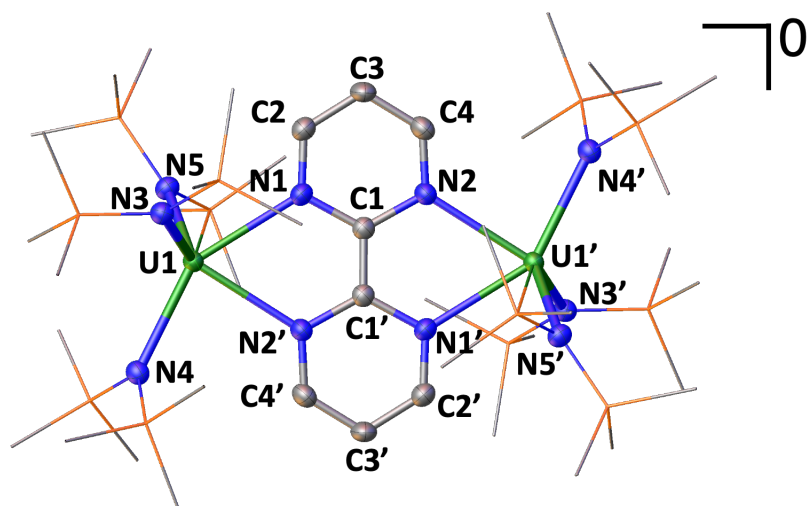

**Figure S12.** Molecular structure of **1**, with thermal ellipsoids drawn at the 50% probability level. Hydrogen atoms and [K(2.2.2-cryptand)] counter cation have been omitted for clarity. Selected bond lengths (Å): U1–(N<sub>amide</sub>)<sub>avg</sub> 2.285(9), U1–N1 2.518(4), U1–N2 2.499(4), N1–C1 1.411(6), N2–C1 1.410(6), N1–C2 1.323(6), N2–C4 1.3334(6), C2–C3 1.401(7), C3–C4 1.392(7), C1–C1' 1.344(9).

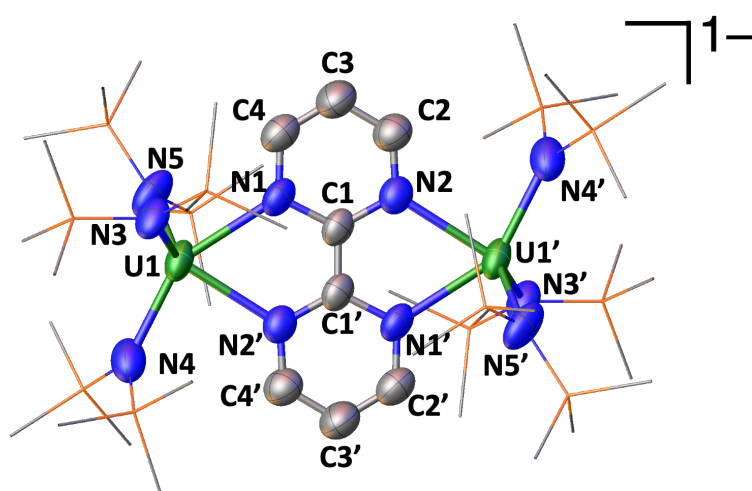

**Figure S13.** Molecular structure of **2**, with thermal ellipsoids drawn at the 50% probability level. Hydrogen atoms and [K(2.2.2-cryptand)] counter cation have been omitted for clarity. Selected bond lengths (Å): U1–(N<sub>amide</sub>)<sub>avg</sub> 2.36(1), U1–N1 2.494(1), U1–N2 2.516(9), N1–C1 1.406(13), N2–C1 1.401(15), N1–C4 1.349(17), N2–C2 1.321(17), C2–C3 1.39(2), C3–C4 1.38(2), C1–C1' 1.37(2).

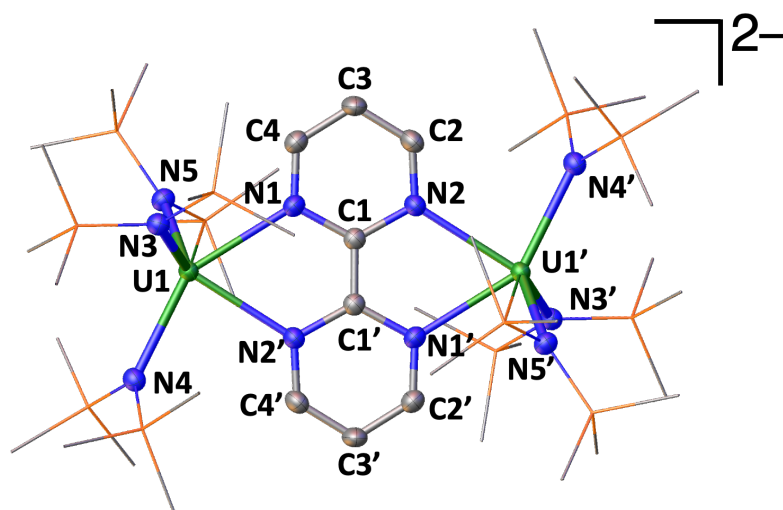

**Figure S14.** Molecular structure of **3**, with thermal ellipsoids drawn at the 50% probability level. Hydrogen atoms and [K(2.2.2-cryptand)] counter cations have been omitted for clarity. Selected bond lengths (Å): U1–(N<sub>amide</sub>)<sub>avg</sub> 2.44(4), U1–N1 2.567(2), U1–N2 2.562(2), N1–C1 1.432(2), N2–C1 1.420(3), N1–C4 1.319(3), N2–C2 1.312(2), C2–C3 1.404(3), C3–C4 1.396(3), C1–C1' 1.349(5).

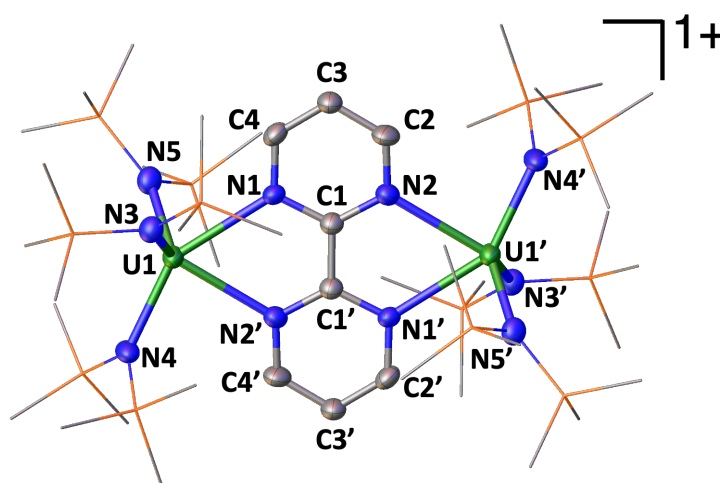

**Figure S15.** Molecular structure of **4**, with thermal ellipsoids drawn at the 50% probability level. Hydrogen atoms and [BPh<sub>4</sub>] counter cations have been omitted for clarity. Selected bond lengths (Å): U1–(N<sub>amide</sub>)<sub>avg</sub> 2.258(6), U1–N1 2.553(5), U1–N2 2.604(5), N1–C1 1.386(7), N2–C1 1.363(7), N1–C4 1.338(7), N2–C2 1.337(7), C2–C3 1.386(8), C3–C4 1.381(8), C1–C1' 1.405(10), U2–(N<sub>amide</sub>)<sub>avg</sub> 2.25(1), U2–N6 2.557(4), U1–N7 2.585(5), N6–C23 1.395(7), N7–C23 1.367(7), N6–C26 1.334(7), N7–C24 1.333(7), C24–C25 1.402(8), C25–C26 1.389(8), C23–C23' 1.409(10).

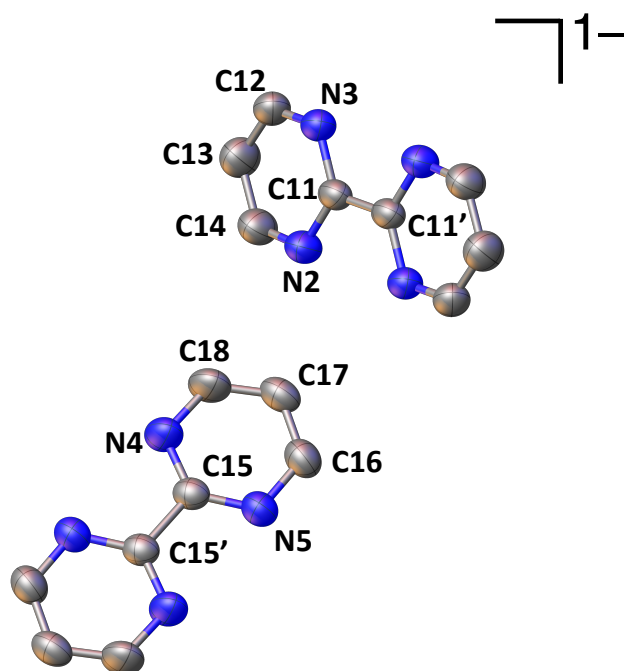

**Figure S16.** Molecular structure of **5** with thermal ellipsoids drawn at the 50% probability level. Hydrogen atoms and [K(2.2.2-cryptand)] counter cation have been omitted for clarity. Selected bond lengths (Å): C11–C11' 1.423(4), N3–C11 1.380(3), N3–C12 1.316(3), C12–C13 1.388(3), C13–C14 1.390(3), N2–C14 1.308(3), N2–C11 1.371(2), C15–C15' 1.506(3), N5–C15 1.339(3), N5–C16 1.334(3), C16–C17 1.365(3), C17–C18 1.359(3), N4–C18 1.339(3), N4–C15 1.320(3).

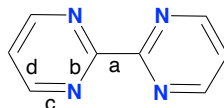

**Table S2** Comparison of averaged bond lengths of complexes **1-5**, with **5** split into bpym<sup>0</sup> and bpym<sup>•-</sup>.

| Bond     | <b>1</b> | <b>2</b>  | <b>3</b> | <b>4</b>  | 5-bpym <sup>0</sup> | 5-bpym <sup>•-</sup> |
|----------|----------|-----------|----------|-----------|---------------------|----------------------|
| <b>a</b> | 1.344(9) | 1.37(2)   | 1.349(5) | 1.407(10) | 1.506(3)            | 1.423(4)             |
| <b>b</b> | 1.411(6) | 1.404(15) | 1.422(3) | 1.378(13) | 1.330(10)           | 1.378(4)             |
| <b>c</b> | 1.329(6) | 1.335(14) | 1.316(4) | 1.336(7)  | 1.337(3)            | 1.312(4)             |
| <b>d</b> | 1.397(7) | 1.39(2)   | 1.400(3) | 1.399(8)  | 1.362(3)            | 1.389(3)             |

**Table S3** Comparison of averaged bond lengths of reference compounds.

| Bond     | Yb–bpym <sup>2-</sup> –Yb <sup>10</sup> | Dy–bpym <sup>•-</sup> –Dy <sup>11</sup> | Tb–bpym <sup>•-</sup> –Tb <sup>11</sup> |
|----------|-----------------------------------------|-----------------------------------------|-----------------------------------------|
| <b>a</b> | 1.359(1)                                | 1.401(7)                                | 1.396(9)                                |
| <b>b</b> | 1.422(10)                               | 1.383(6)                                | 1.376(8)                                |
| <b>c</b> | 1.313(11)                               | 1.340(8)                                | 1.344(10)                               |
| <b>d</b> | 1.406(13)                               | 1.377(9)                                | 1.381(10)                               |



## Electrochemistry data

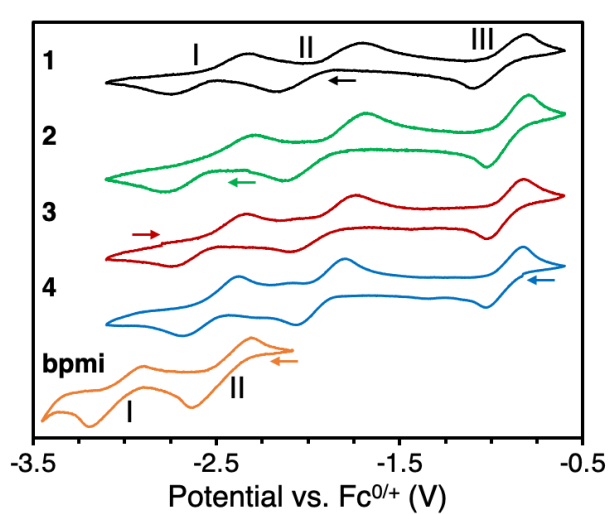

**Figure S17** Cyclic voltammograms of crystals of complexes **1-4** and 2,2'-bipyrimidine (bpym) in THF/0.06 M [NBu<sub>4</sub>][BPh<sub>4</sub>] at a 50 mV/s scan rate versus Fc<sup>0/+</sup> using a Pt<sup>0</sup> disk as a working electrode (arrow indicates scan direction).

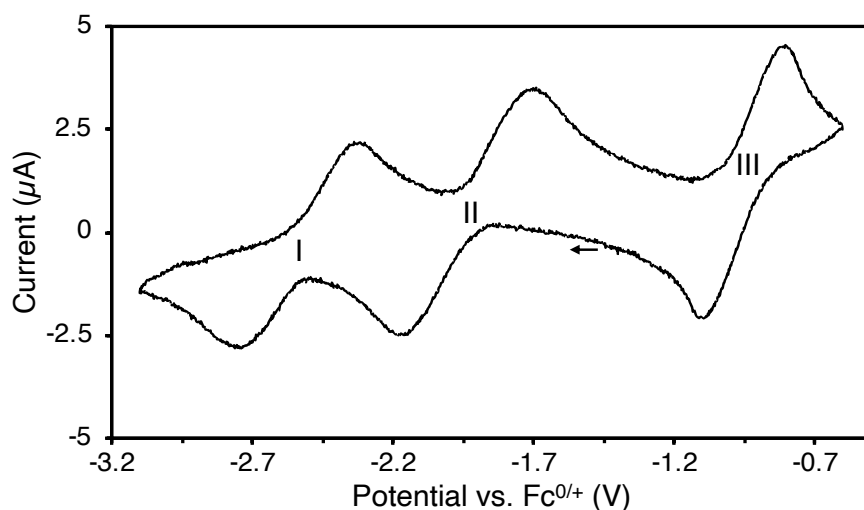

**Figure S18** Cyclic voltammogram of crystals of **1** in THF/0.06 M [NBu<sub>4</sub>][BPh<sub>4</sub>] at a 50 mV/s scan rate versus Fc<sup>0/+</sup> using a Pt<sup>0</sup> disk as a working electrode (arrow indicates scan direction).

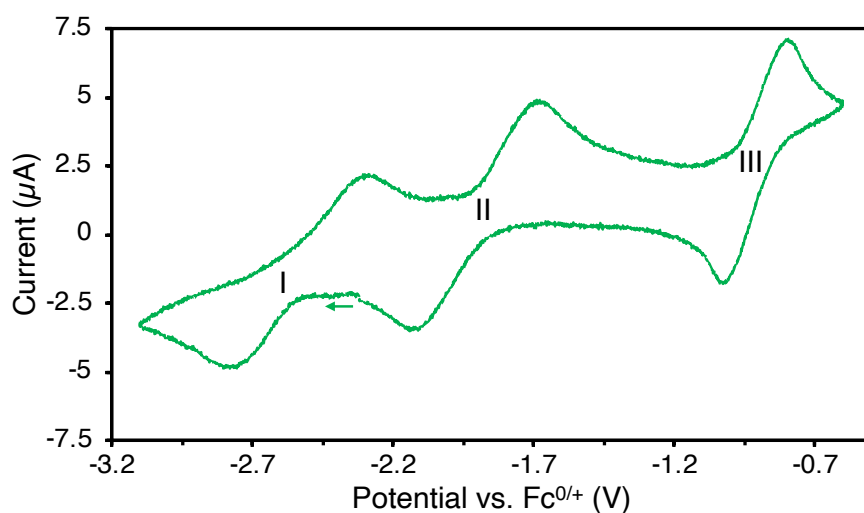

**Figure S19** Cyclic voltammogram of crystals of **2** in THF/0.06 M [NBu<sub>4</sub>][BPh<sub>4</sub>] at a 50 mV/s scan rate versus Fc<sup>0/+</sup> using a Pt<sup>0</sup> disk as a working electrode (arrow indicates scan direction).

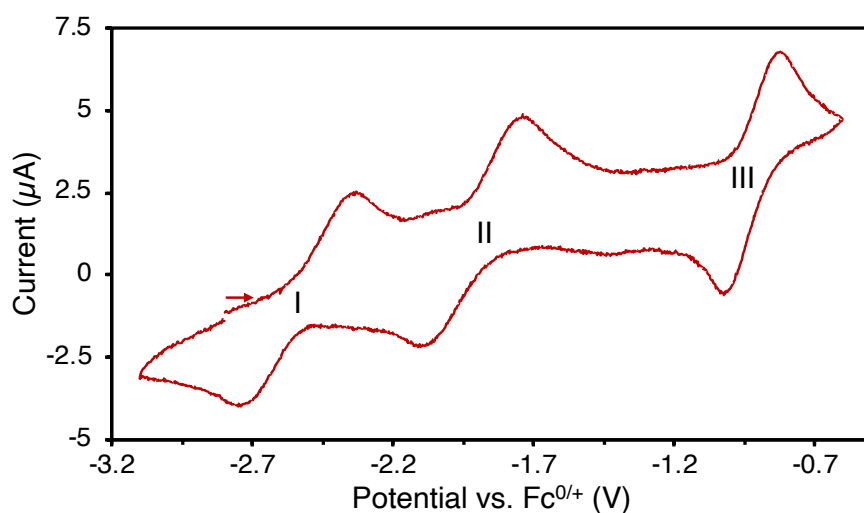

**Figure S20** Cyclic voltammogram of crystals of **3** in THF/0.06 M [NBu<sub>4</sub>][BPh<sub>4</sub>] at a 50 mV/s scan rate versus Fc<sup>0/+</sup> using a Pt<sup>0</sup> disk as a working electrode (arrow indicates scan direction).

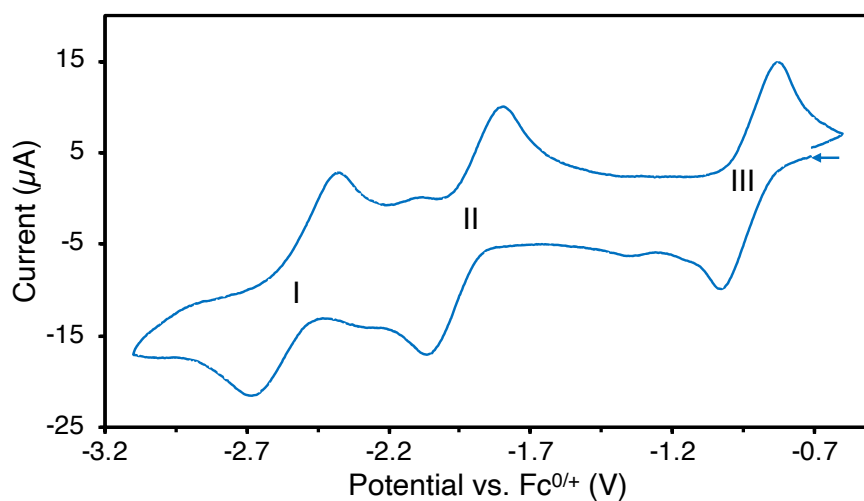

**Figure S21** Cyclic voltammogram of crystals of **4** in THF/0.06 M [NBu<sub>4</sub>][BPh<sub>4</sub>] at a 50 mV/s scan rate versus Fc<sup>0/+</sup> using a Pt<sup>0</sup> disk as a working electrode (arrow indicates scan direction).

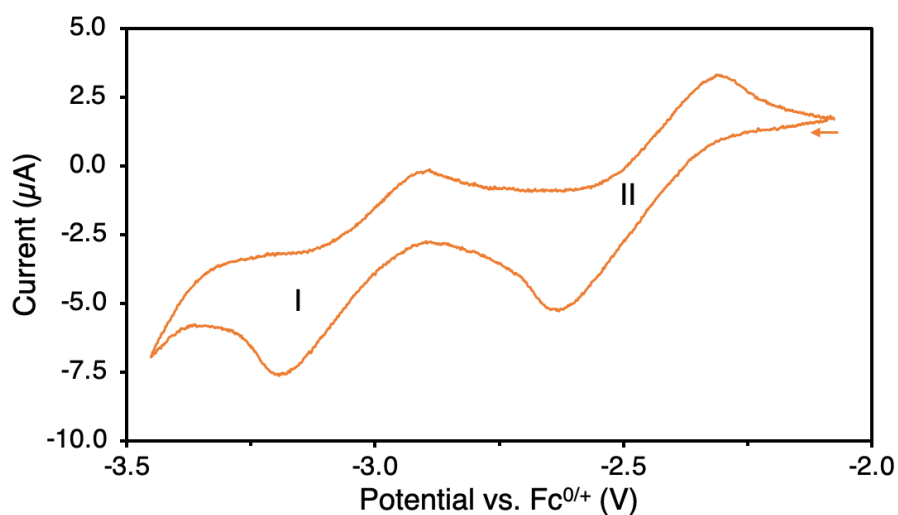

**Figure S22** Cyclic voltammogram of 2,2'-bipyrimidine in THF/0.06 M [NBu<sub>4</sub>][BPh<sub>4</sub>] at a 50 mV/s scan rate versus Fc<sup>0/+</sup> using a Pt<sup>0</sup> disk as a working electrode (arrow indicates scan direction).

**Table S4** Potentials of cathodic and anodic waves observed in the cyclic voltammograms of complexes **1-4** and 2,2'-bipyrimidine (bpym).

| Wave        | I                   |                     | II                  |                     | III                 |                     |
|-------------|---------------------|---------------------|---------------------|---------------------|---------------------|---------------------|
|             | E <sub>pc</sub> (V) | E <sub>pa</sub> (V) | E <sub>pc</sub> (V) | E <sub>pa</sub> (V) | E <sub>pc</sub> (V) | E <sub>pa</sub> (V) |
| <b>1</b>    | -2.75               | -2.34               | -2.19               | -1.69               | -1.10               | -0.80               |
| <b>2</b>    | -2.74               | -2.32               | -2.10               | -1.72               | -1.03               | -0.82               |
| <b>3</b>    | -2.76               | -2.29               | -2.14               | -1.68               | -1.04               | -0.80               |
| <b>4</b>    | -2.68               | -2.37               | -2.06               | -1.80               | -1.03               | -0.83               |
| <b>bpym</b> | -3.19               | -2.89               | -2.63               | -2.31               |                     |                     |

## DC magnetic data

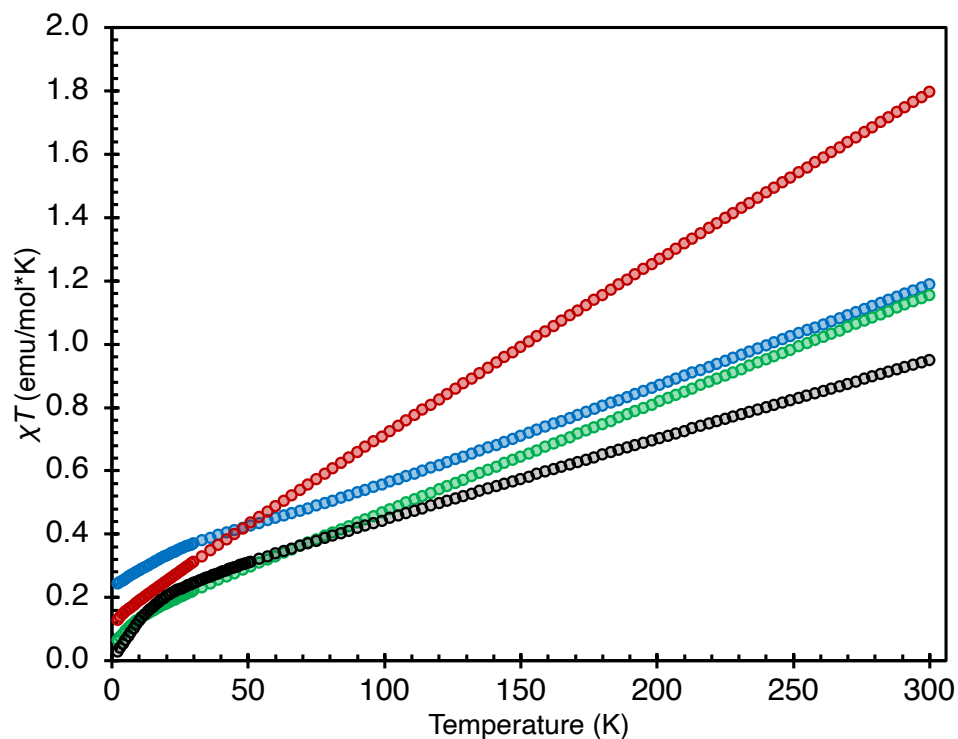

Figure S23  $\chi T(T)$  product overlay of complexes 1-4 up to 300 K (black, 1; green, 2; red, 3; blue, 4).

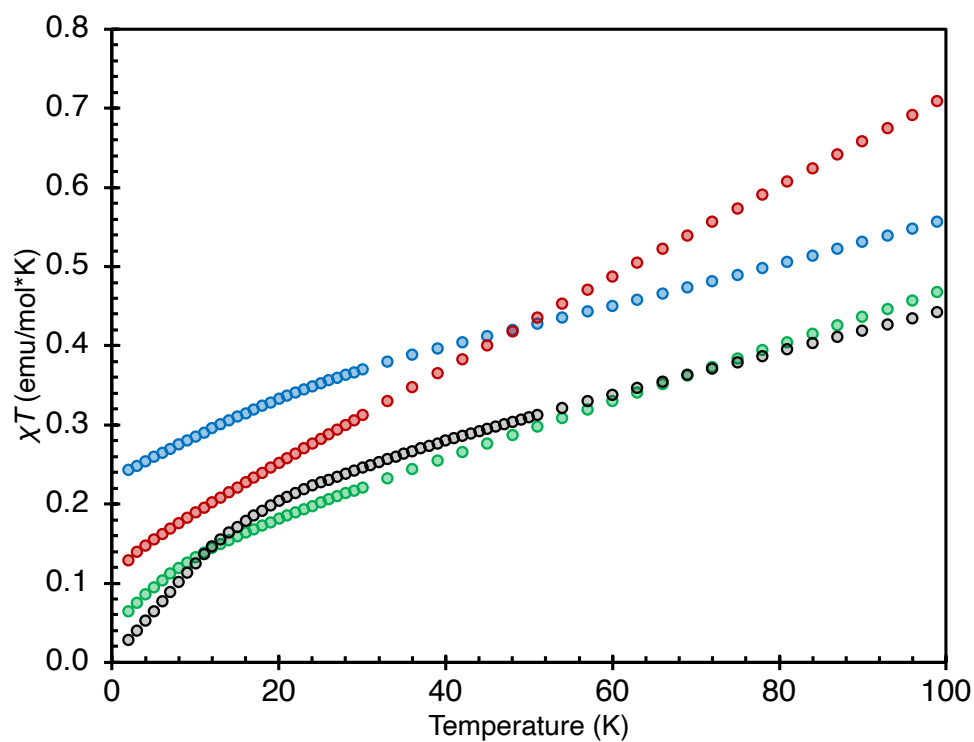

Figure S24  $\chi T(T)$  product overlay of complexes 1-4 up to 100 K (black, 1; green, 2; red, 3; blue, 4).

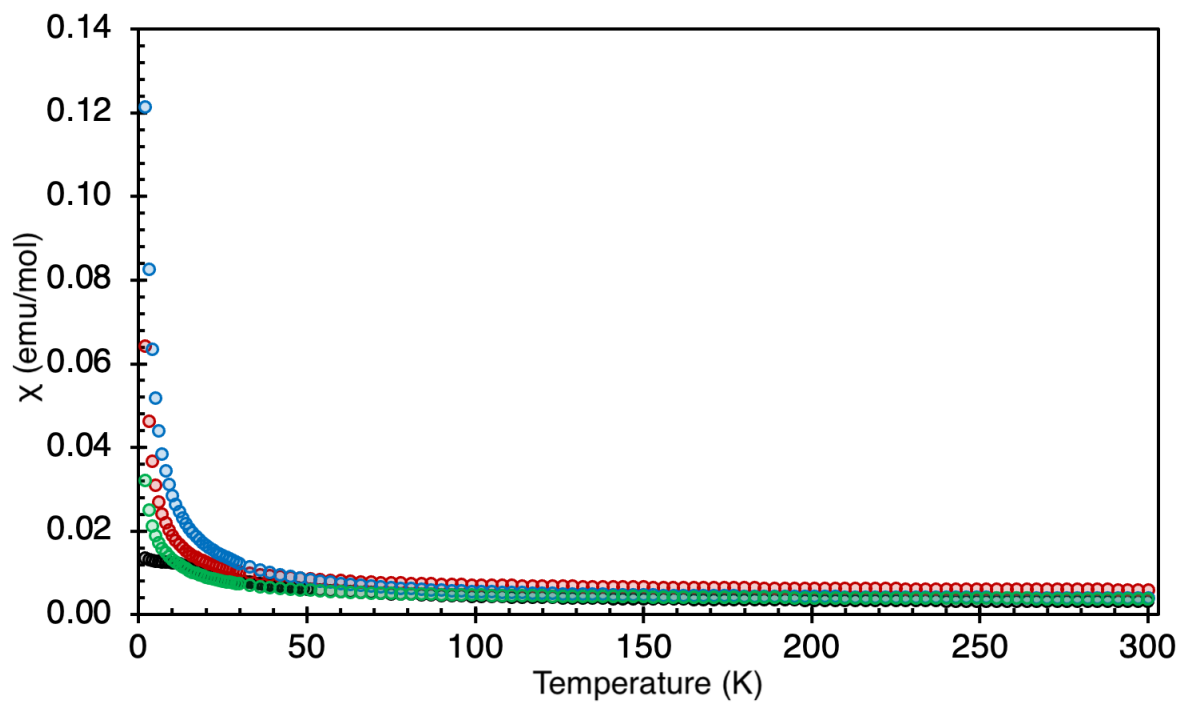

Figure S25  $\chi(T)$  product overlays of complexes 1-4 up to 300 K (black, 1; green, 2; red, 3; blue, 4).

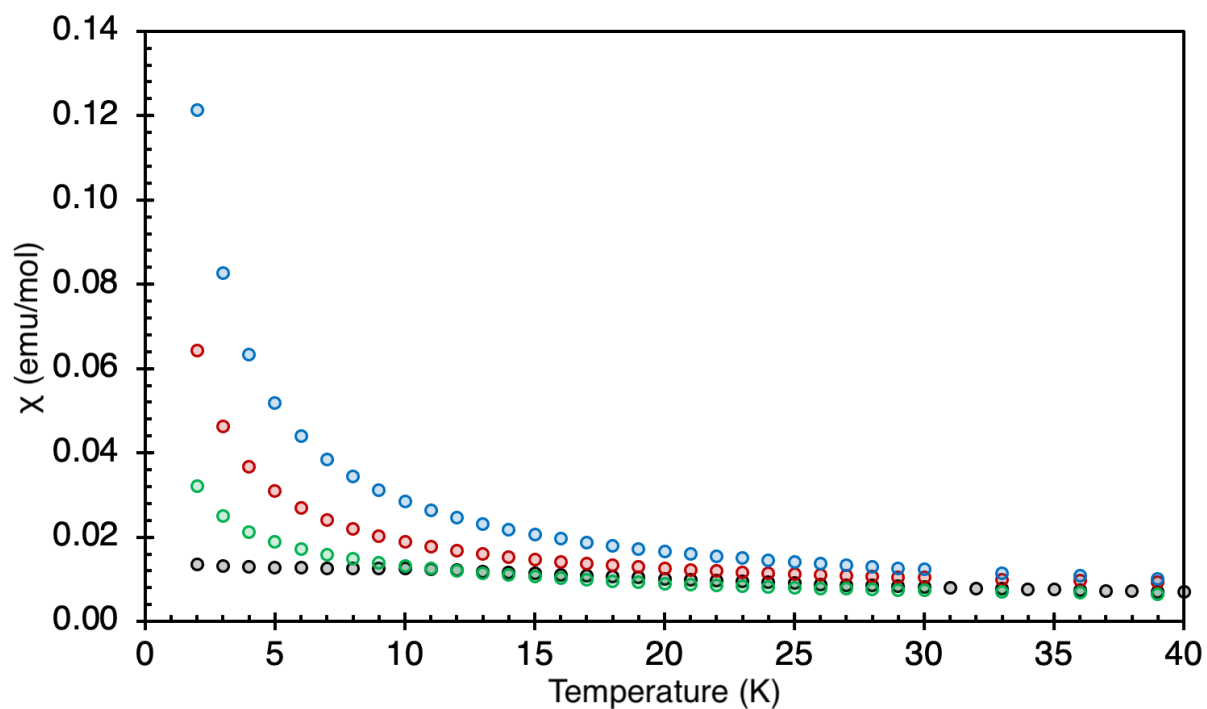

Figure S26  $\chi(T)$  product overlays of complexes 1-4 up to 40 K (black, 1; green, 2; red, 3; blue, 4).

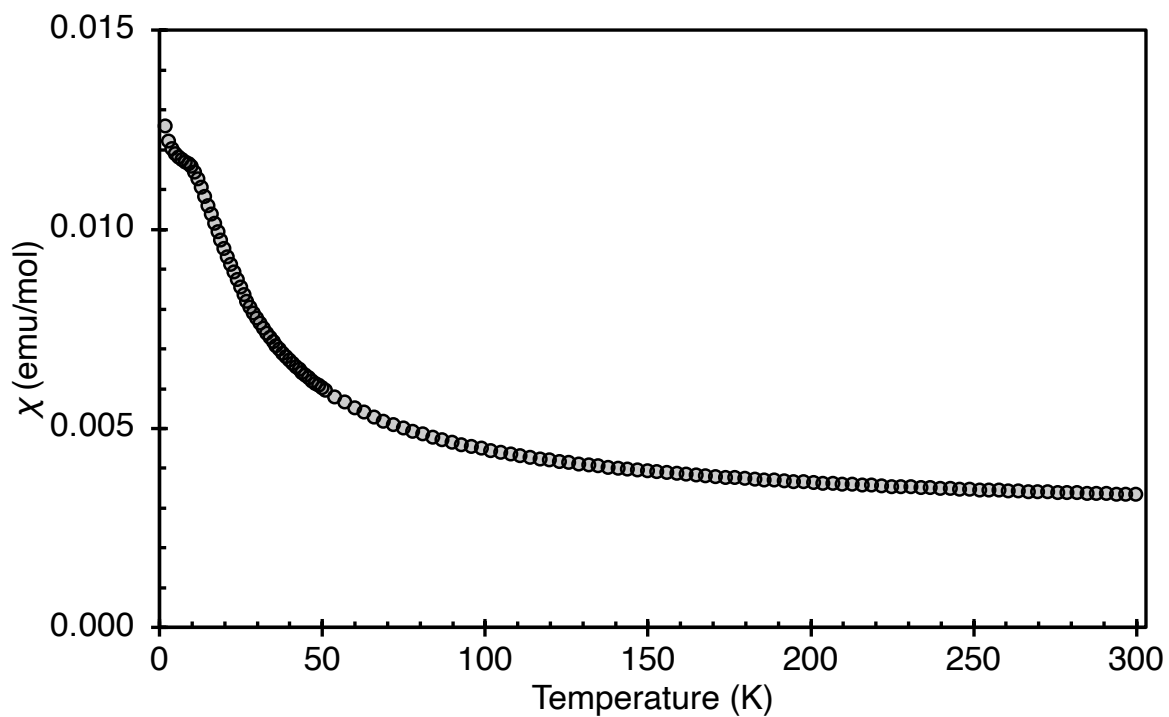

**Figure S27** Molar magnetic susceptibility per uranium center versus temperature for complex 1, measured under applied field of 0.1 T.

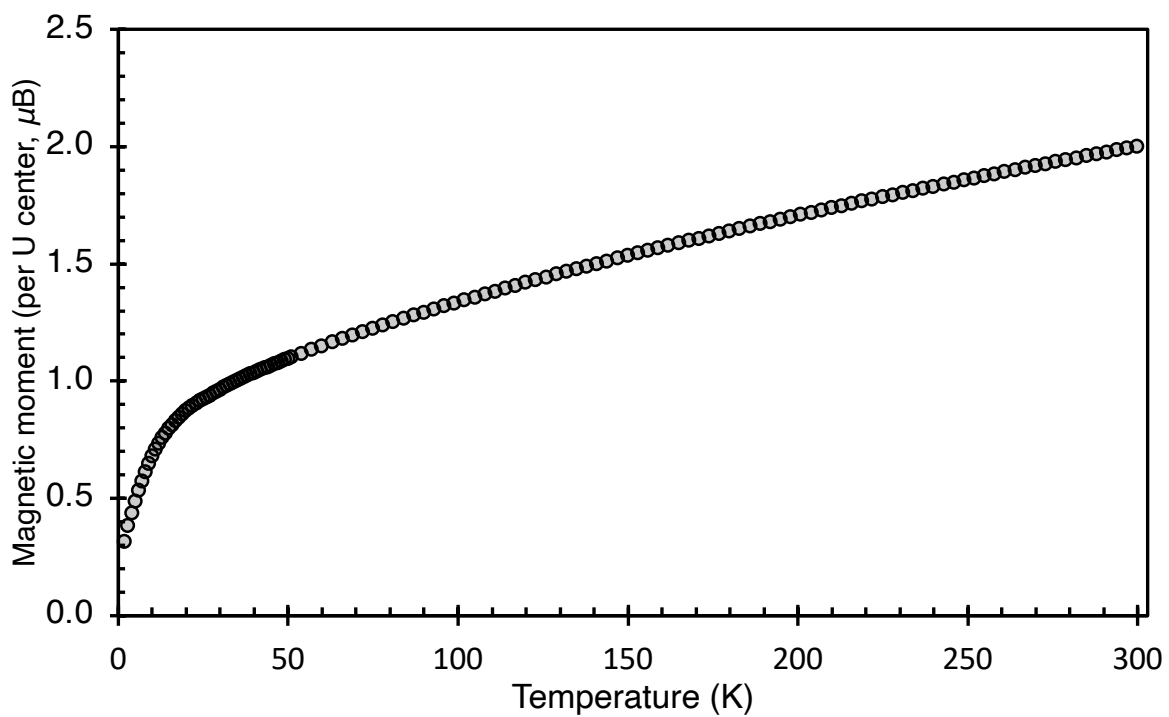

**Figure S28** Magnetic moment per uranium center versus temperature for complex 1, measured under applied field of 0.1 T.

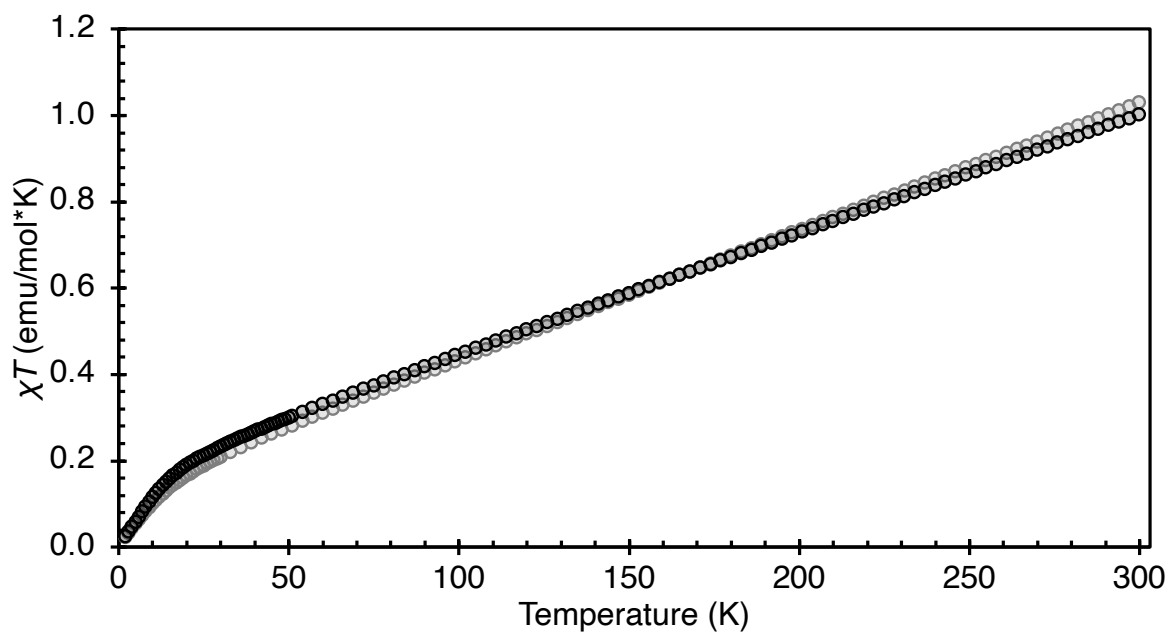

**Figure S29** Temperature-dependent magnetization data for two independently synthesized samples of **1**, shown as overlaid  $\chi T(T)$  products.

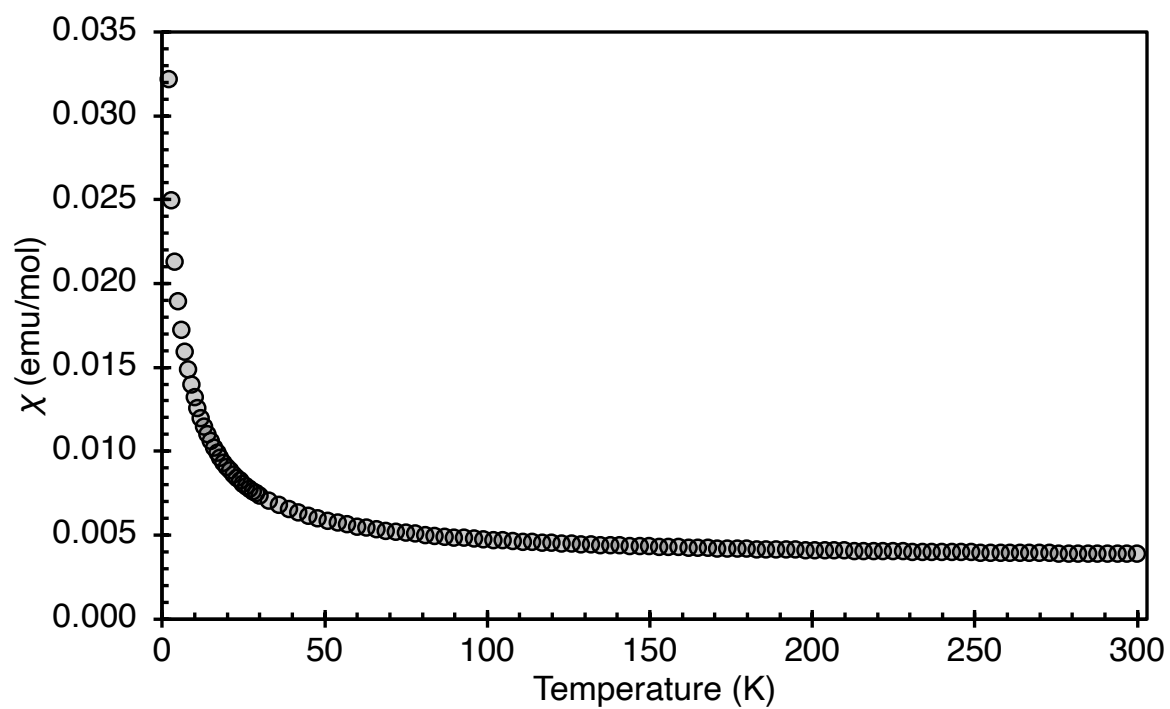

**Figure S30** Molar magnetic susceptibility per uranium center versus temperature for complex **2**, measured under applied field of 0.1 T.

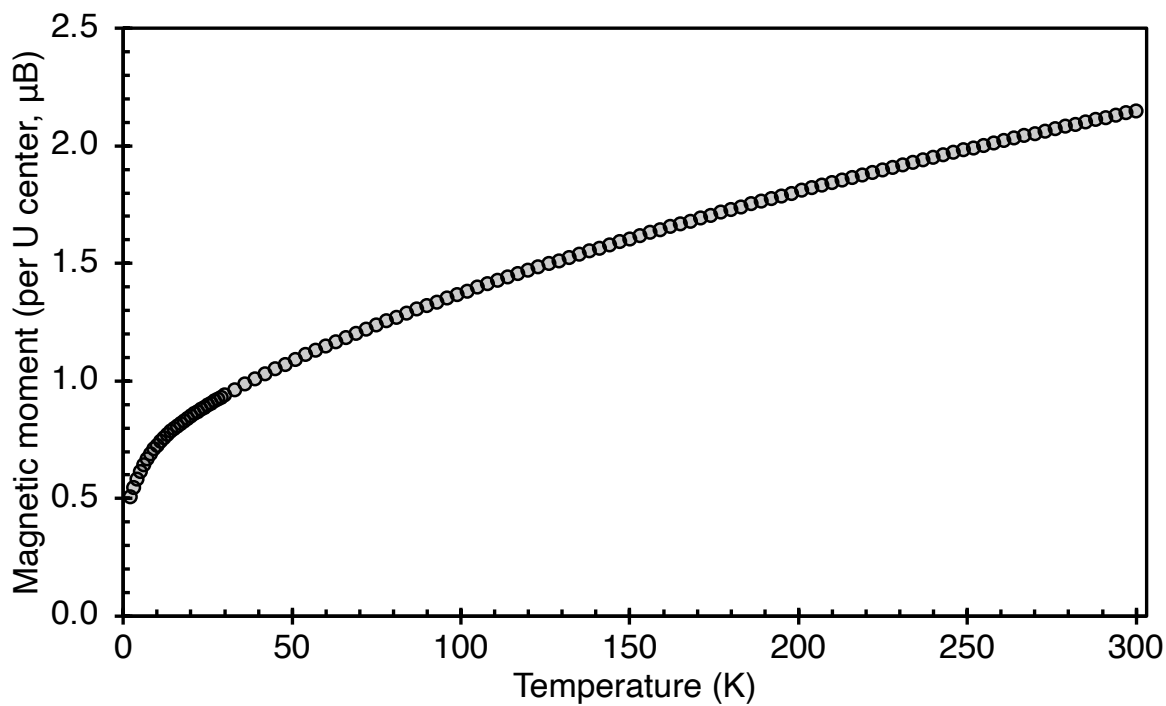

Figure S31 Magnetic moment per uranium center versus temperature for complex 2, measured under applied field of 0.1 T.

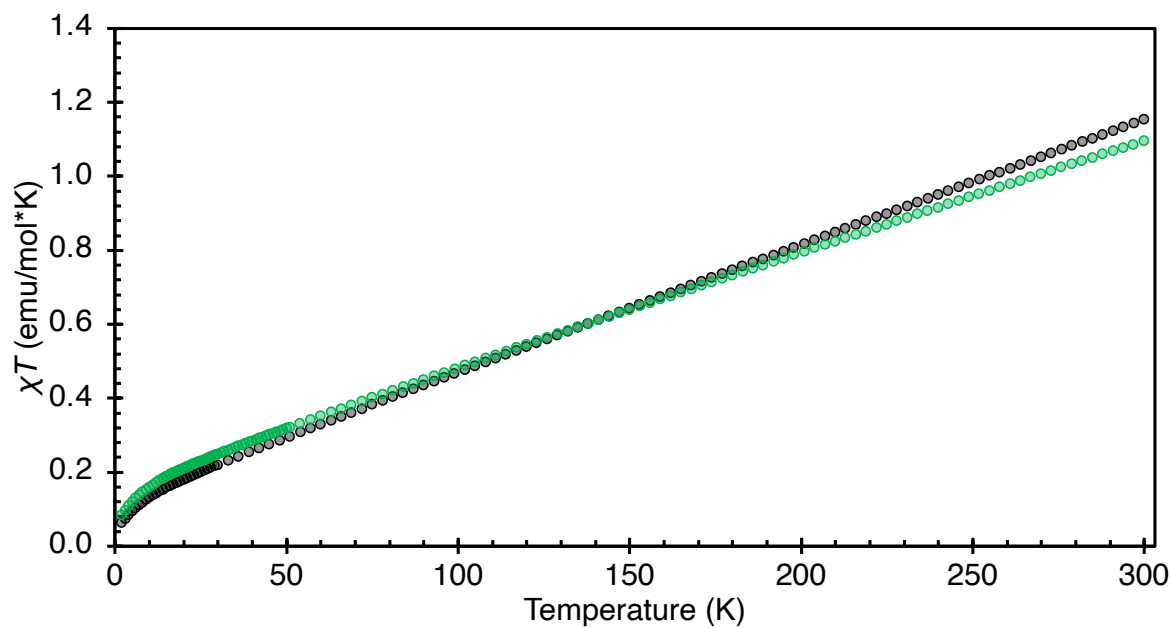



**Figure S32** Temperature-dependent magnetization data for two independently synthesized samples of **2**, shown as overlaid  $\chi T(T)$  products.

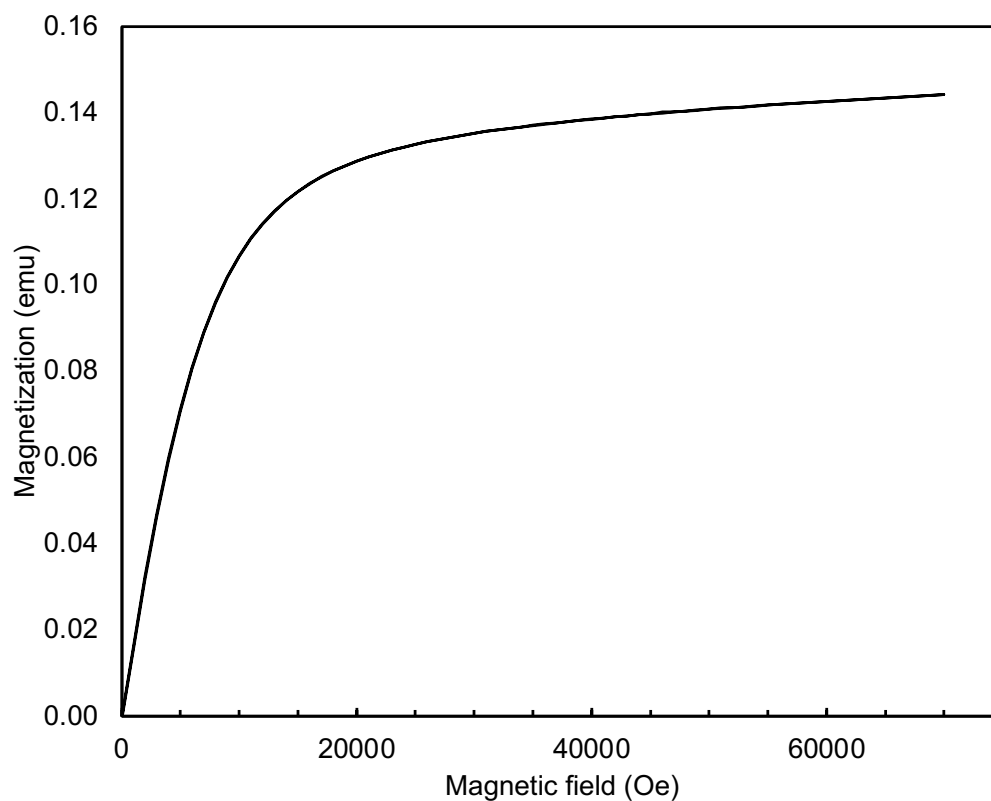

**Figure S33** M(H) curve (hysteresis loop) for the complex **2** at 1.8 K.

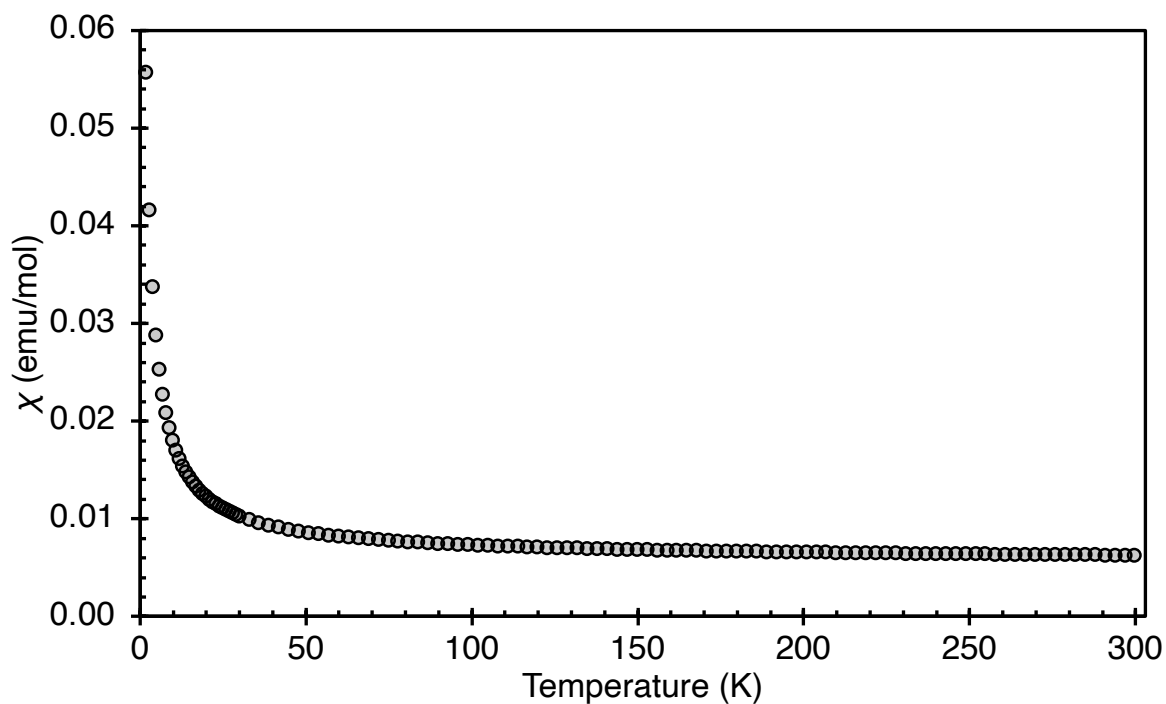

**Figure S34** Magnetic moment per uranium center versus temperature for complex **3**, measured under applied field of 0.1 T.

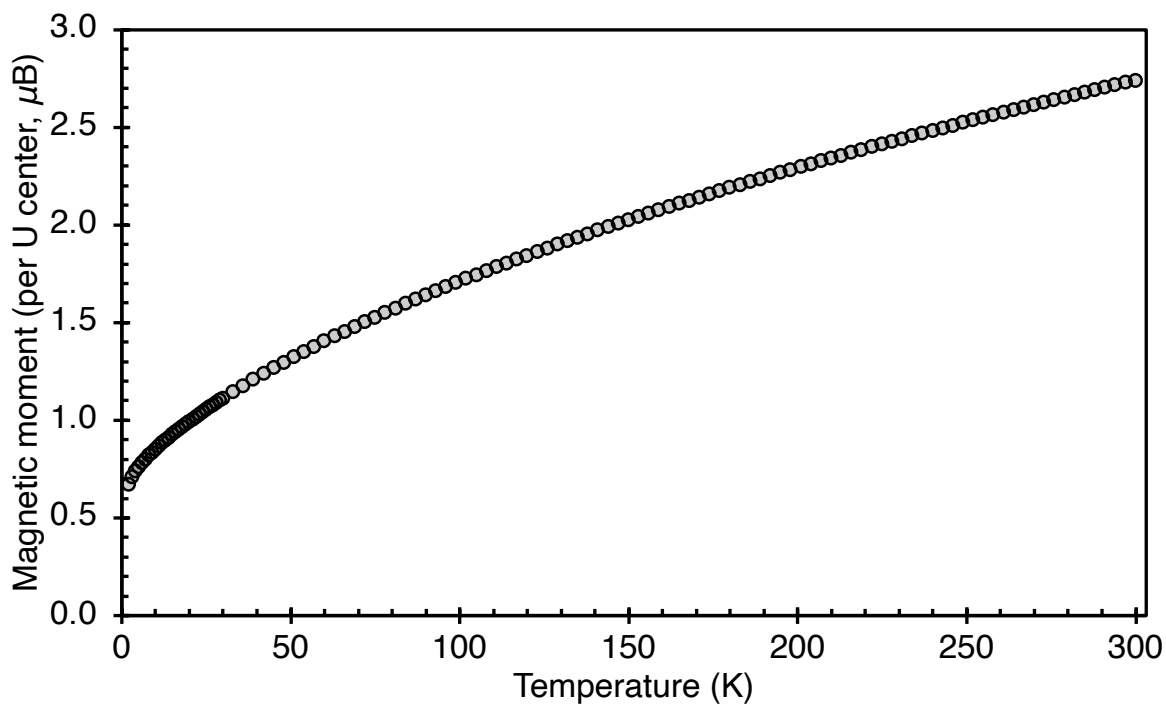

**Figure S35** Magnetic moment per uranium center versus temperature for complex **3**, measured under applied field of 0.1 T.

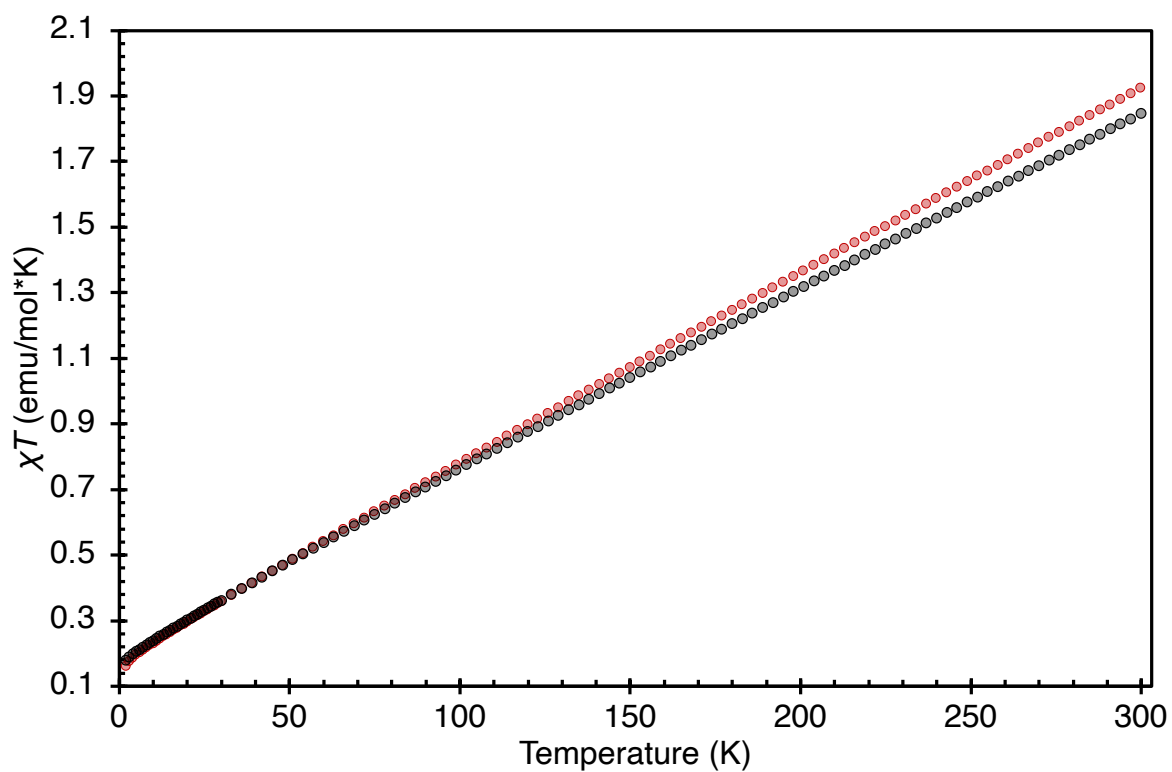

**Figure S36** Temperature-dependent magnetization data for two independently synthesized samples of **3**, shown as overlaid  $\chi T(T)$  products.

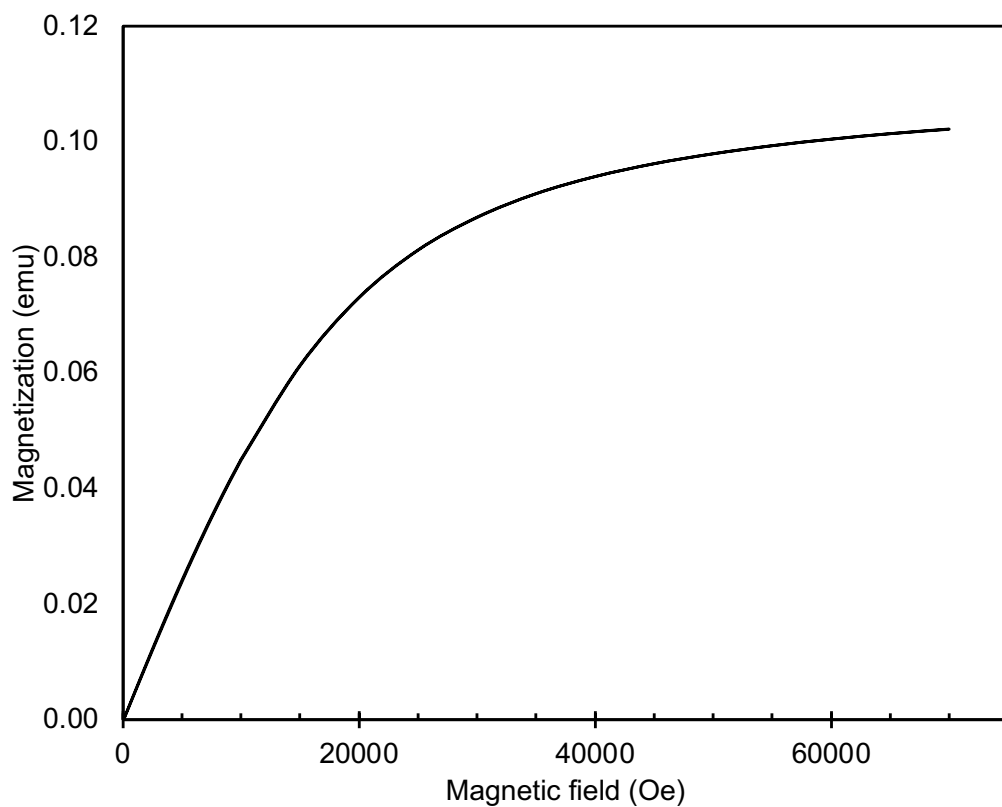

**Figure S37** M(H) curve (hysteresis loop) for the complex **3** at 1.8 K.

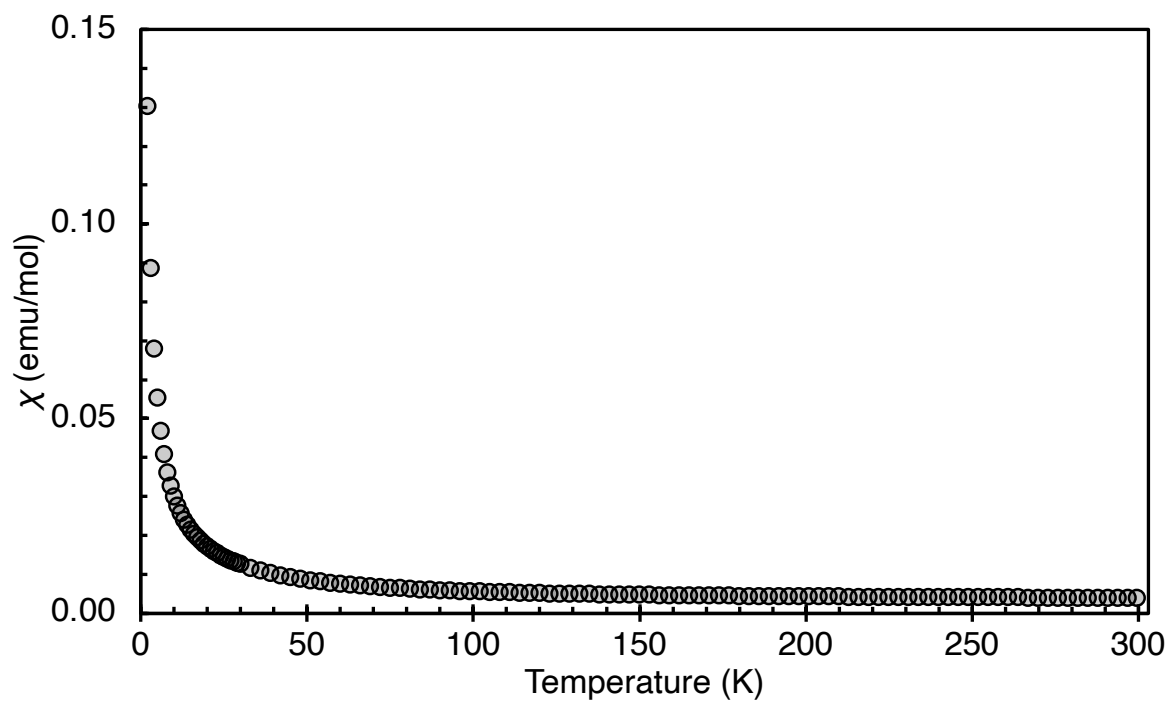

**Figure S38** Molar magnetic susceptibility versus temperature for complex **4**, measured under applied field of 0.1 T.

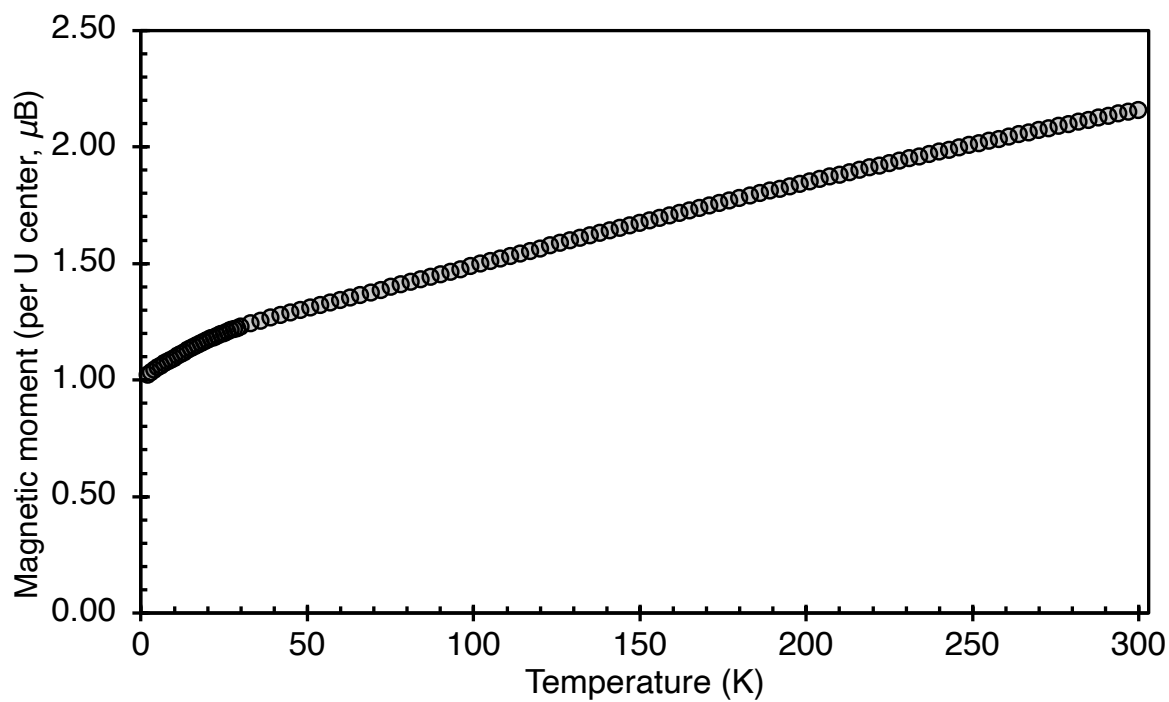

**Figure S39** Magnetic moment per uranium center versus temperature for complex **4**, measured under applied field of 0.1 T.

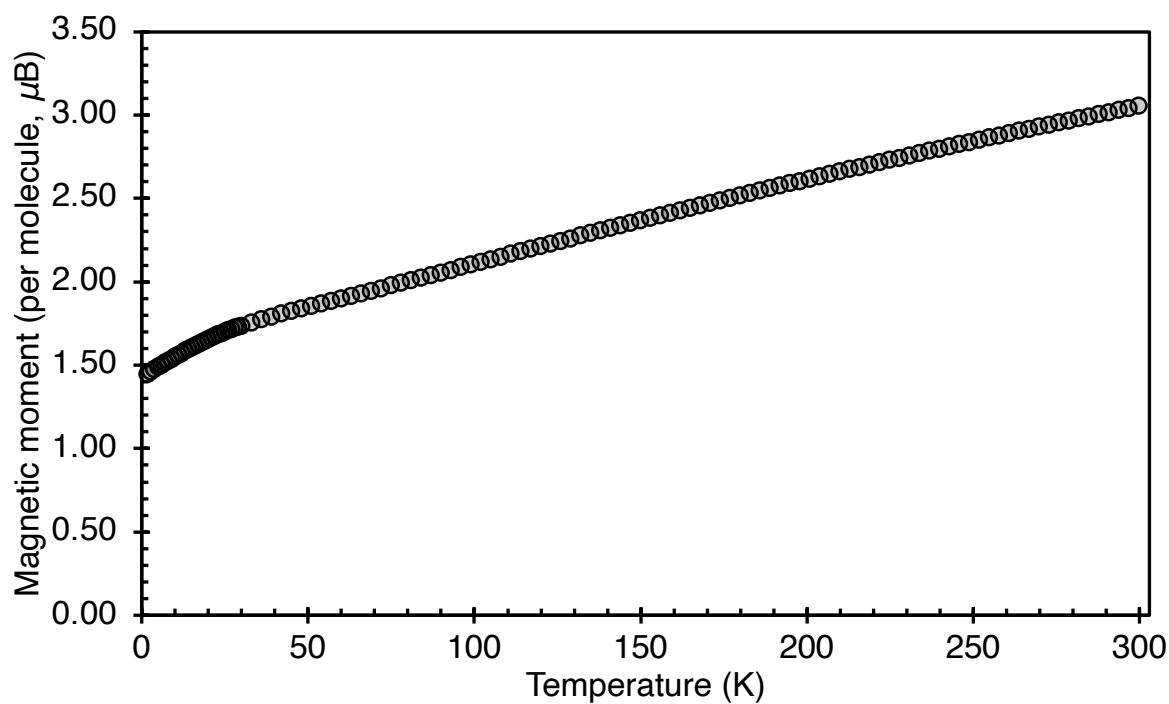

**Figure S40** Magnetic moment per molecule versus temperature for complex **4**, measured under applied field of 0.1 T.

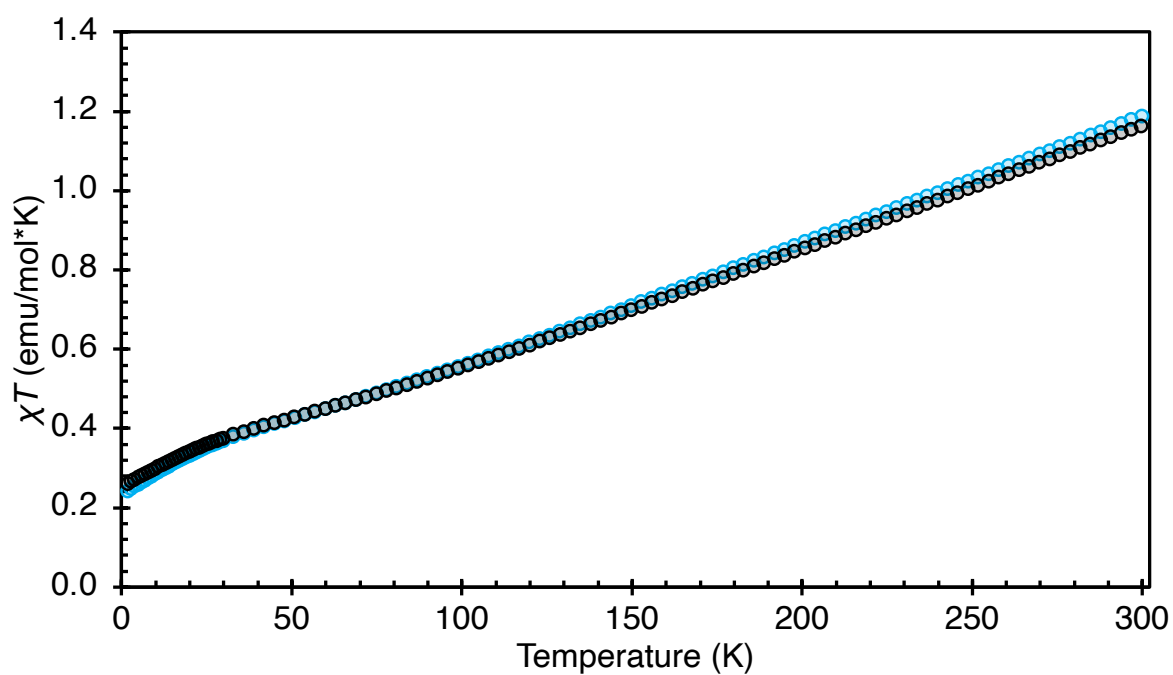

**Figure S41** Temperature-dependent magnetization data for two independently synthesized samples of **4**, shown as overlaid  $\chi T(T)$  products.

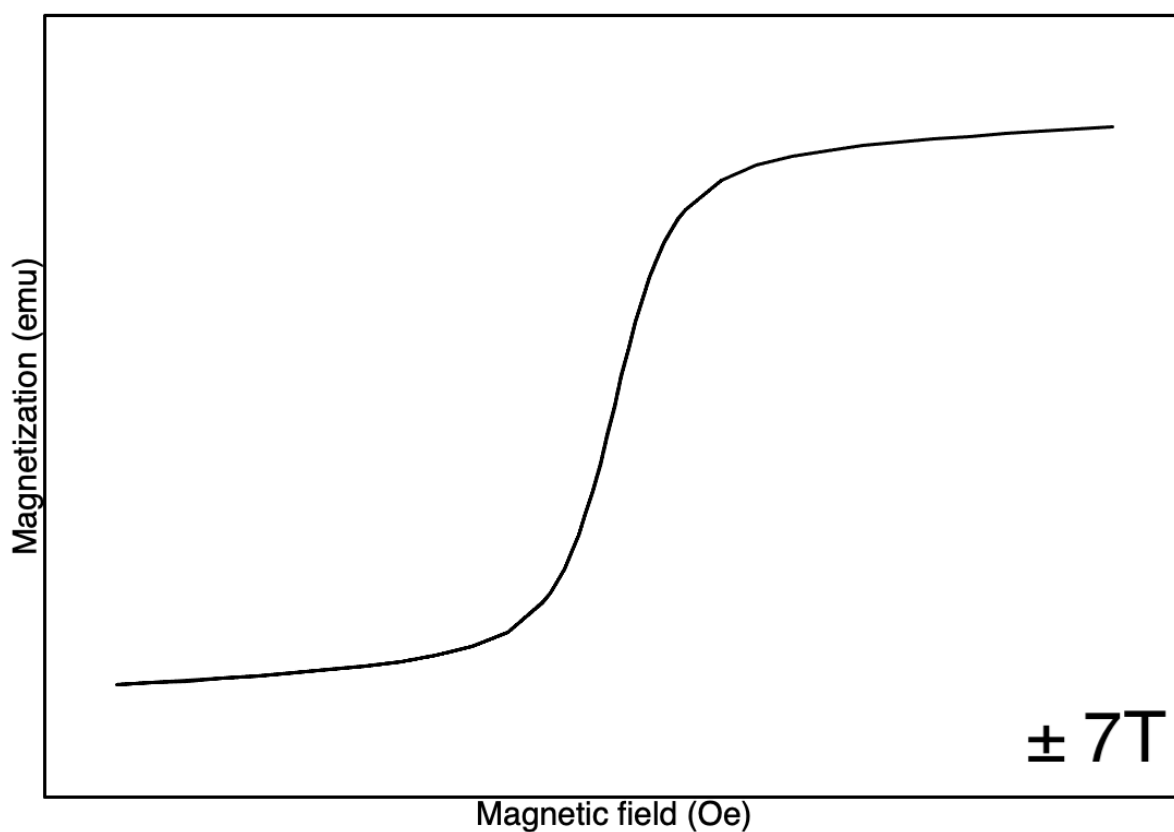

**Figure S42** M(H) curve (hysteresis loop) for the complex **4** at 1.8 K.

## EPR measurements

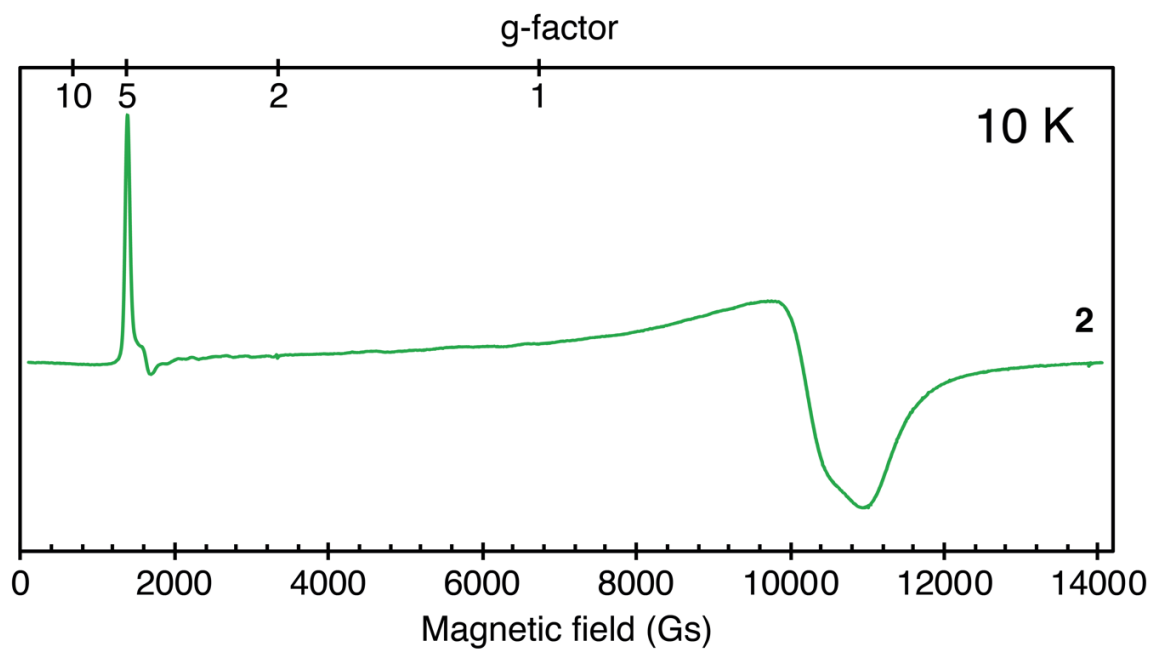

**Figure S43** Solid-state EPR spectrum of complex **2**, recorded at 10 K.

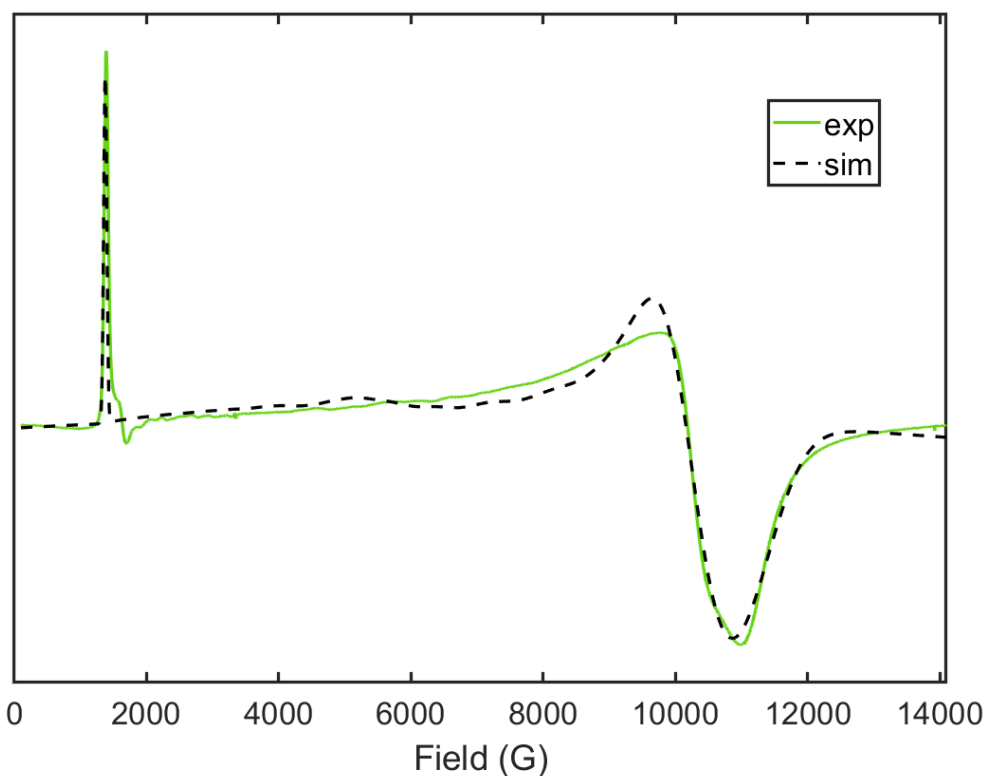

**Figure S44** Modelling of solid-state EPR spectrum of complex **2** at 10 K, performed in EasySpin package. Modelling parameters are:  $g = [4.88; 0.652; 0.607]$ ,  $H_{\text{strain}} = [380; 850; 1050]$

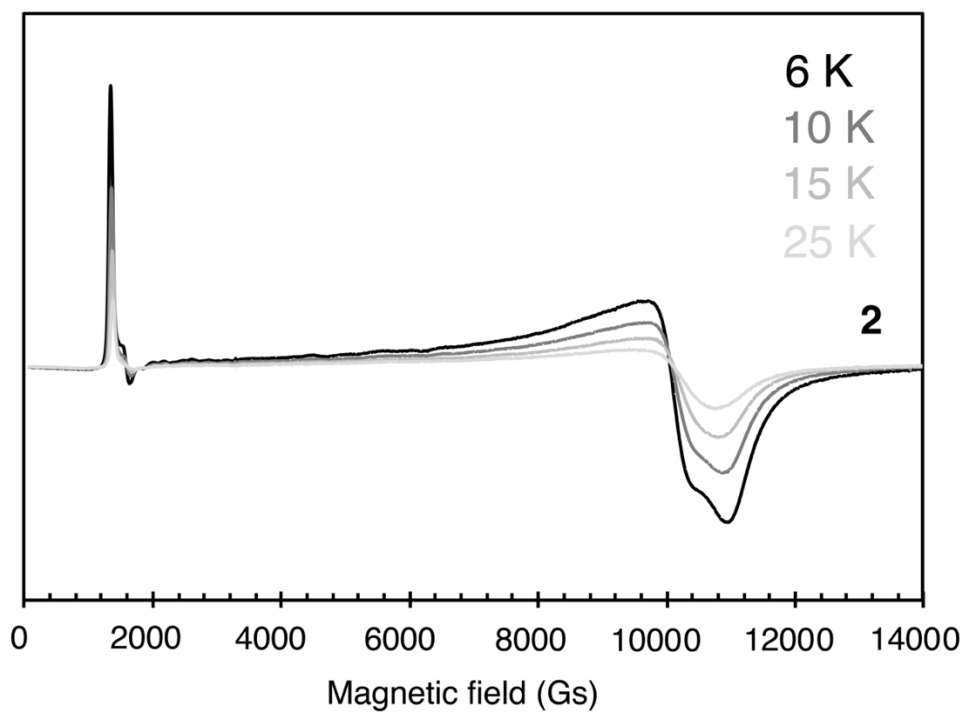

**Figure S45** Variable temperature solid-state EPR spectra of complex 2.

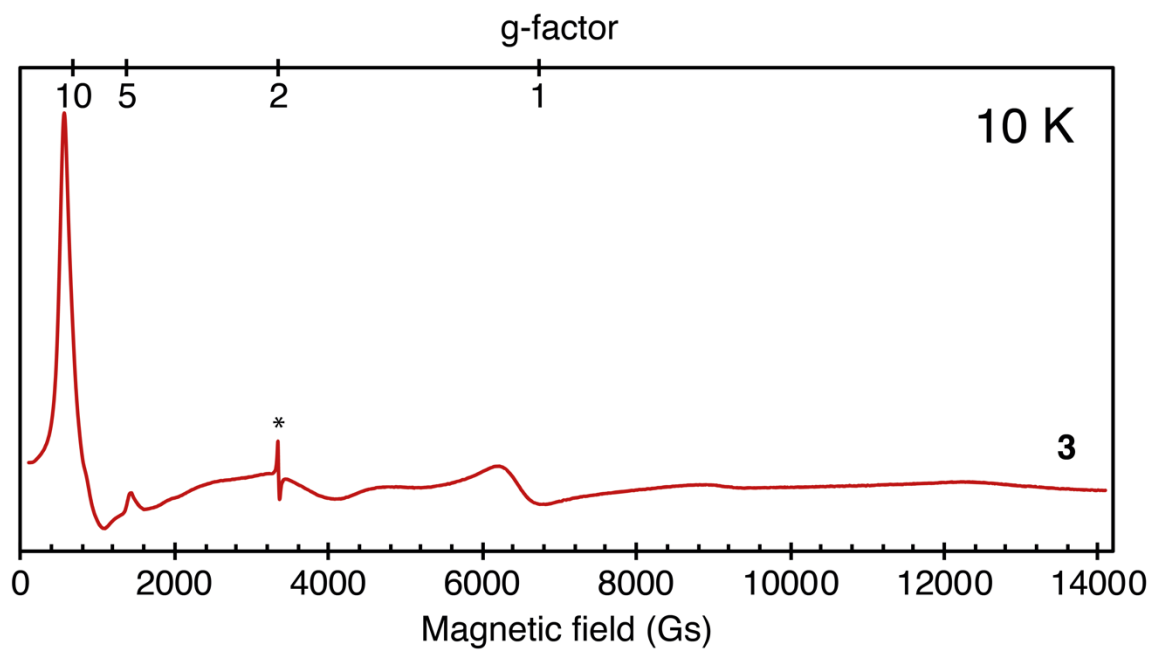

Figure S46 Solid-state EPR spectrum of complex 3, recorded at 10 K.

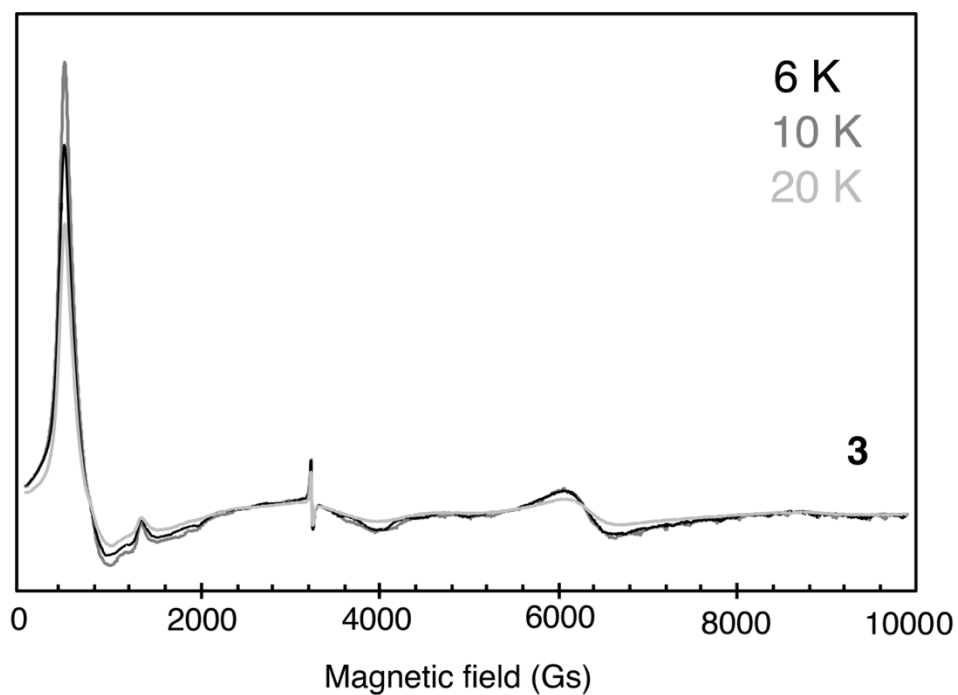

Figure S47 Variable temperature solid-state EPR spectra of complex 3.



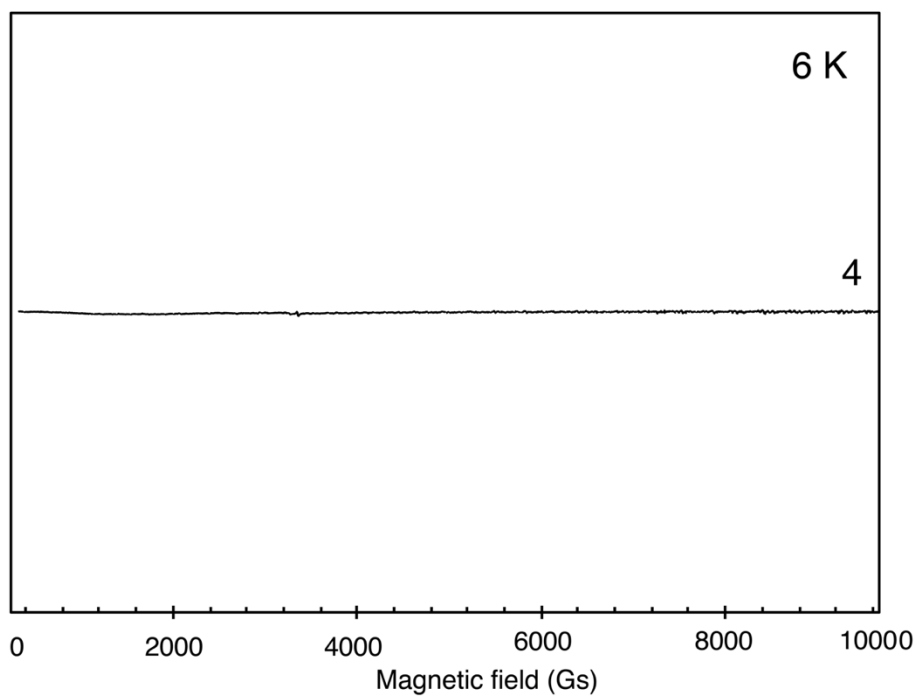

**Figure S48** Solid-state EPR spectra of radical-bridged complex **4** at 6 K (no signal above noise level).

### AC magnetic data

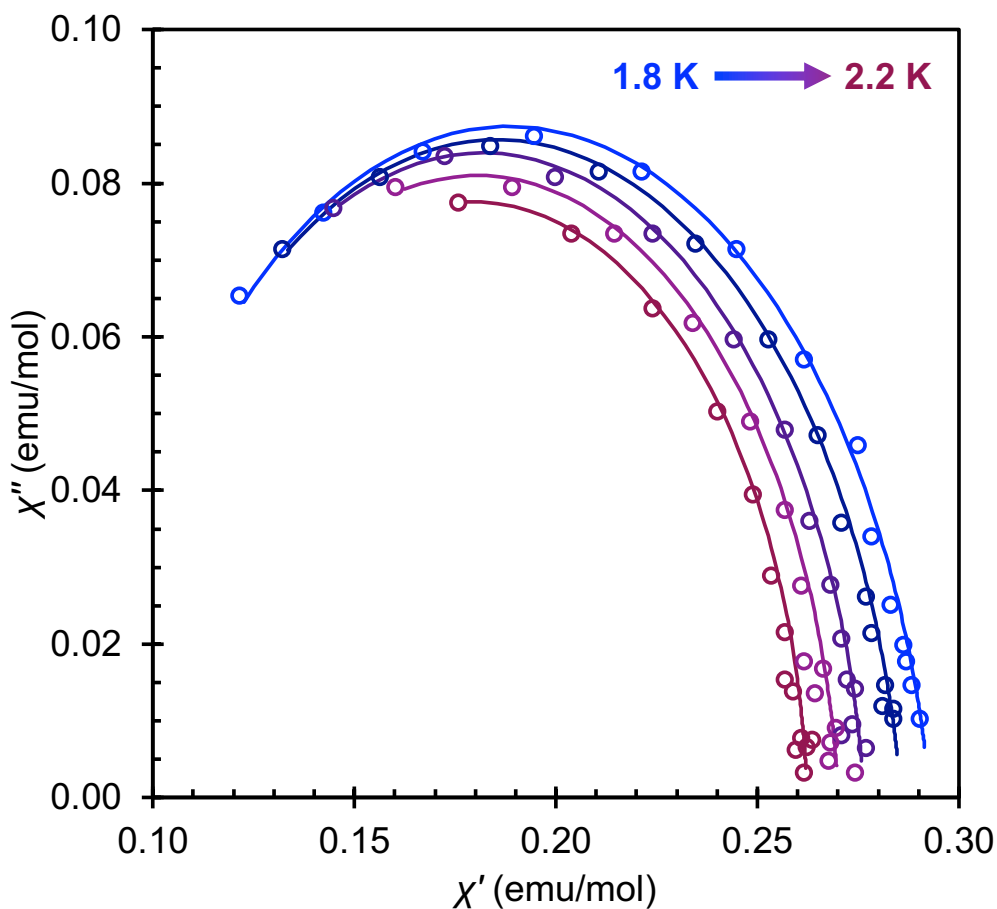

**Figure S49** Argand (Cole-Cole) plot (points) for **2**, fitted with generalised Debye model (lines) in the temperature range 1.8-2.2 K under 0.2 T DC field.

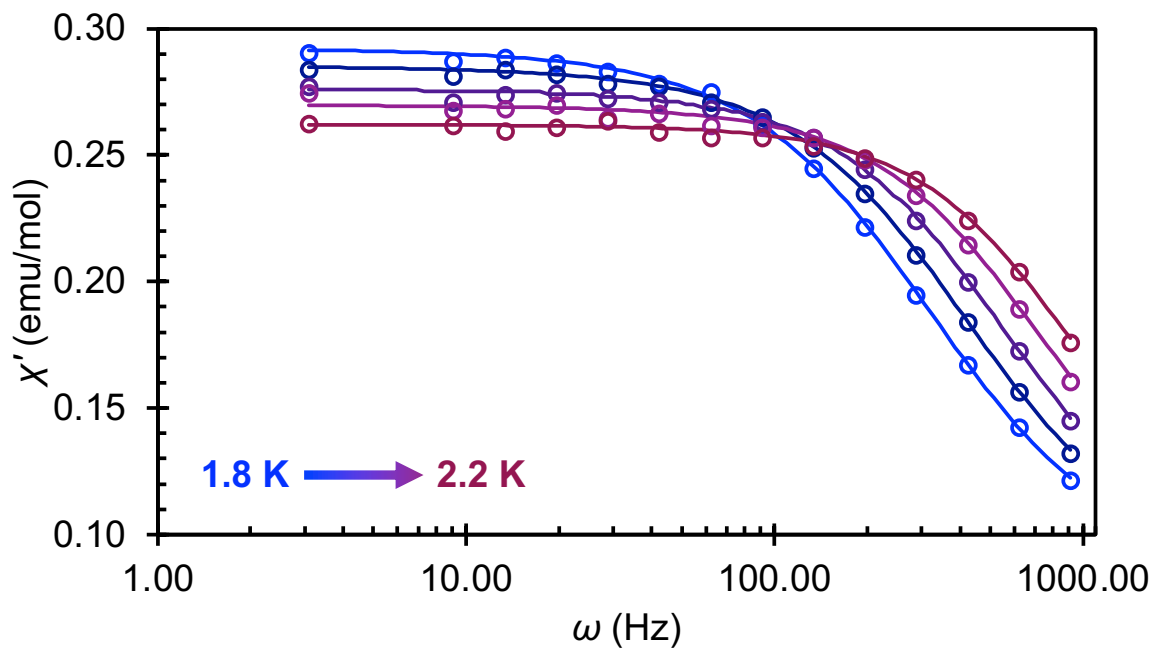

**Figure S50** In-phase ( $\chi'$ ) AC susceptibility for **2**, fitted with generalised Debye model in the temperature range 1.8-2.2 K under 0.2 T DC field.

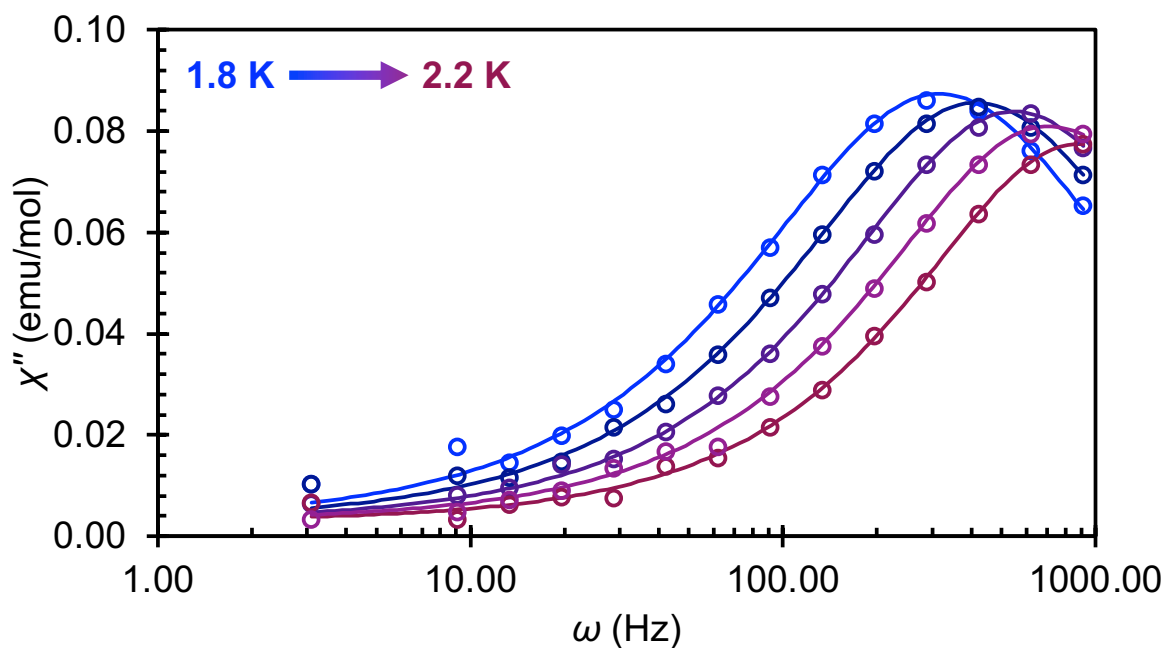

**Figure S51** Out-of-phase ( $\chi''$ ) AC susceptibility for **2**, fitted with generalised Debye model in the temperature range 1.8-2.2 K under 0.2 T DC field.

**Table S5** Table of extracted constant temperature susceptibility ( $\chi_T$ ), adiabatic susceptibility ( $\chi_S$ ), parameter gauging the width of distribution of relaxation times ( $\alpha$ ) and relaxation time ( $\tau$ ) at each individual temperature, for compound **2** under an applied field of 0.2 T

| T (K) | $\chi_T$ (emu/mol) | $\chi_S$ (emu/mol) | $\alpha$ | $\tau$ (s)  |
|-------|--------------------|--------------------|----------|-------------|
| 1.80  | 0.29               | 0.08               | 0.13     | 0.001072(9) |
| 1.90  | 0.29               | 0.09               | 0.12     | 0.000782(6) |
| 2.00  | 0.28               | 0.09               | 0.10     | 0.000544(5) |
| 2.10  | 0.27               | 0.09               | 0.09     | 0.000404(8) |
| 2.20  | 0.26               | 0.10               | 0.06     | 0.000293(6) |

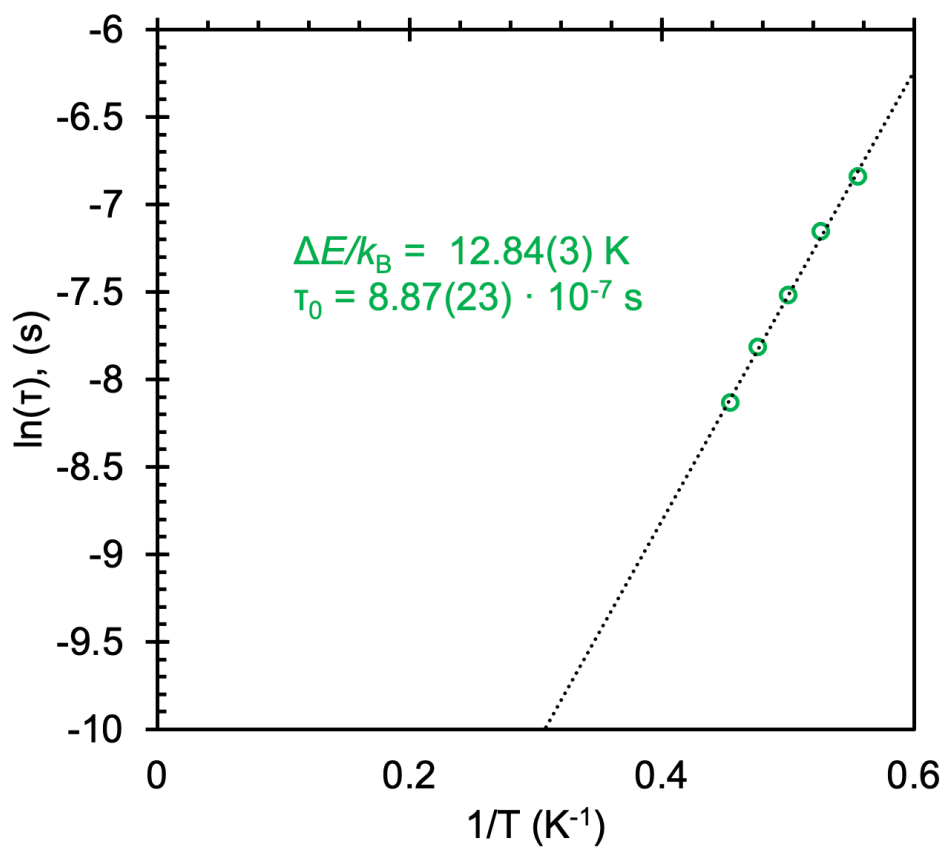

**Figure S52** Arrhenius plot of **2** in the temperature region 1.8-2.2 K under 0.2 T DC field, with the obtained parameters of  $\Delta E/k_B = 12.84(3) \text{ K}$ ,  $\tau_0 = 8.87(23) \cdot 10^{-7} \text{ s}$ . The fit is extended to show linearity.

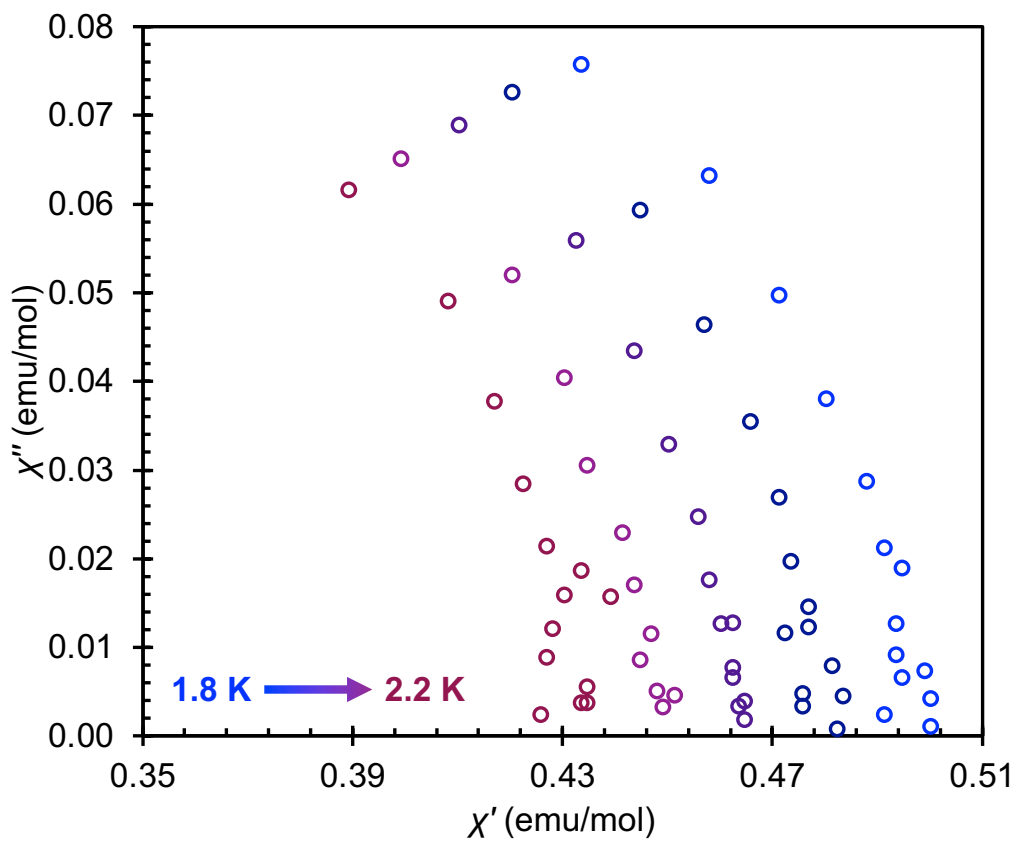

Figure S53 Argand (Cole-Cole) plot for 3 (no visible maximum).

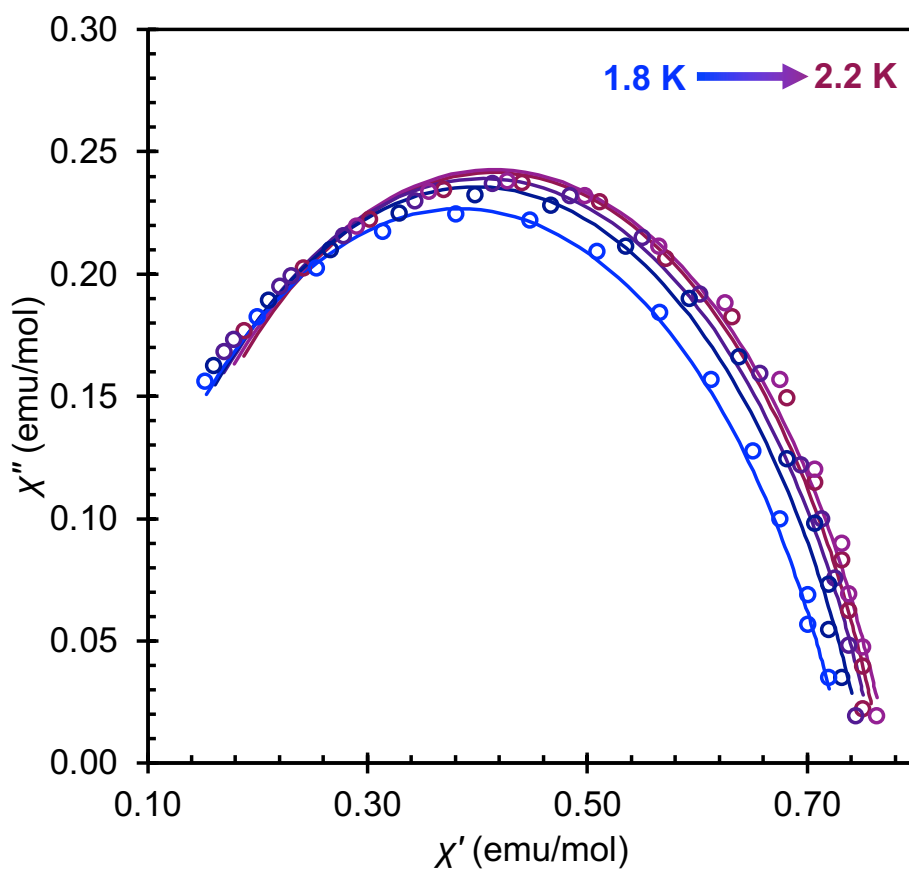

**Figure S54** Argand (Cole-Cole) plot (points) for **4**, fitted with generalised Debye model (lines) in the temperature range 1.8-2.2 K under 0.2 T DC field.

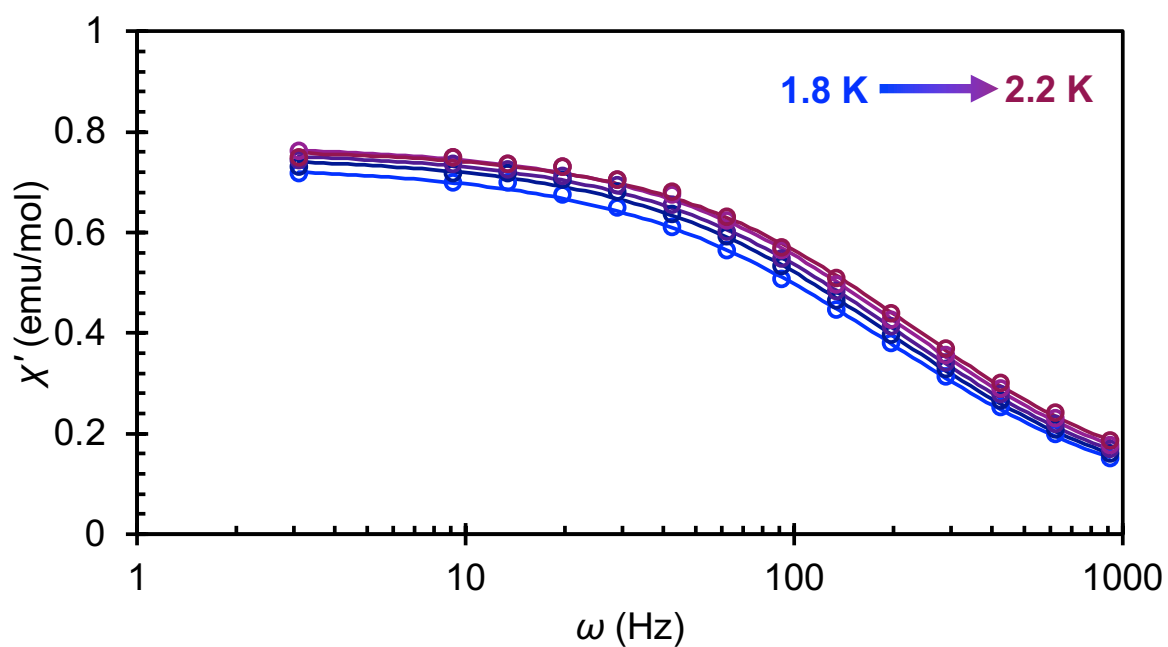

**Figure S55** In-phase ( $\chi'$ ) AC susceptibility for **4**, fitted with generalised Debye model in the temperature range 1.8-2.2 K under 0.2 T DC field.

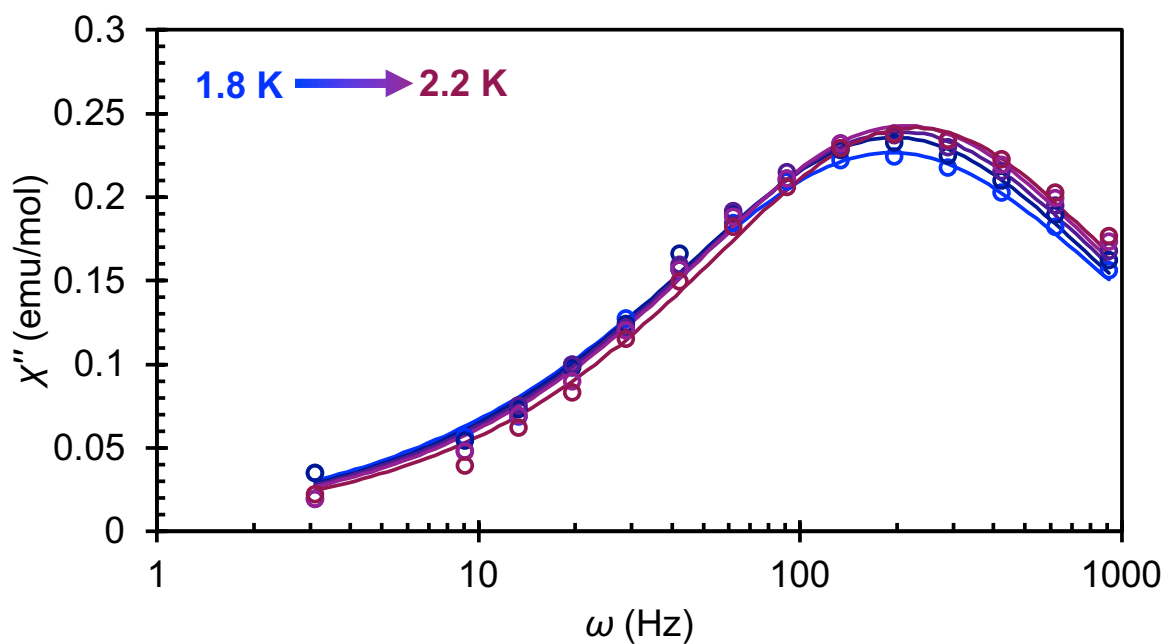

**Figure S56** Out-of-phase ( $\chi''$ ) AC susceptibility for **4**, fitted with generalised Debye model in the temperature range 1.8-2.2 K under 0.2 T DC field.

**Table S6** Table of extracted constant temperature susceptibility ( $\chi_T$ ), adiabatic susceptibility ( $\chi_S$ ), parameter gauging the width of distribution of relaxation times ( $\alpha$ ) and relaxation time ( $\tau$ ) at each individual temperature, for compound **4** under an applied field of 0.2 T

| T (K) | $\chi_T$ (emu/mol) | $\chi_S$ (emu/mol) | $\alpha$ | $\tau$ (s) |
|-------|--------------------|--------------------|----------|------------|
| 1.80  | 0.74               | 0.03               | 0.27     | 0.00304(1) |
| 1.90  | 0.75               | 0.04               | 0.25     | 0.00278(2) |
| 2.00  | 0.76               | 0.05               | 0.25     | 0.00263(1) |
| 2.10  | 0.78               | 0.05               | 0.25     | 0.00248(1) |
| 2.20  | 0.77               | 0.06               | 0.24     | 0.00225(2) |

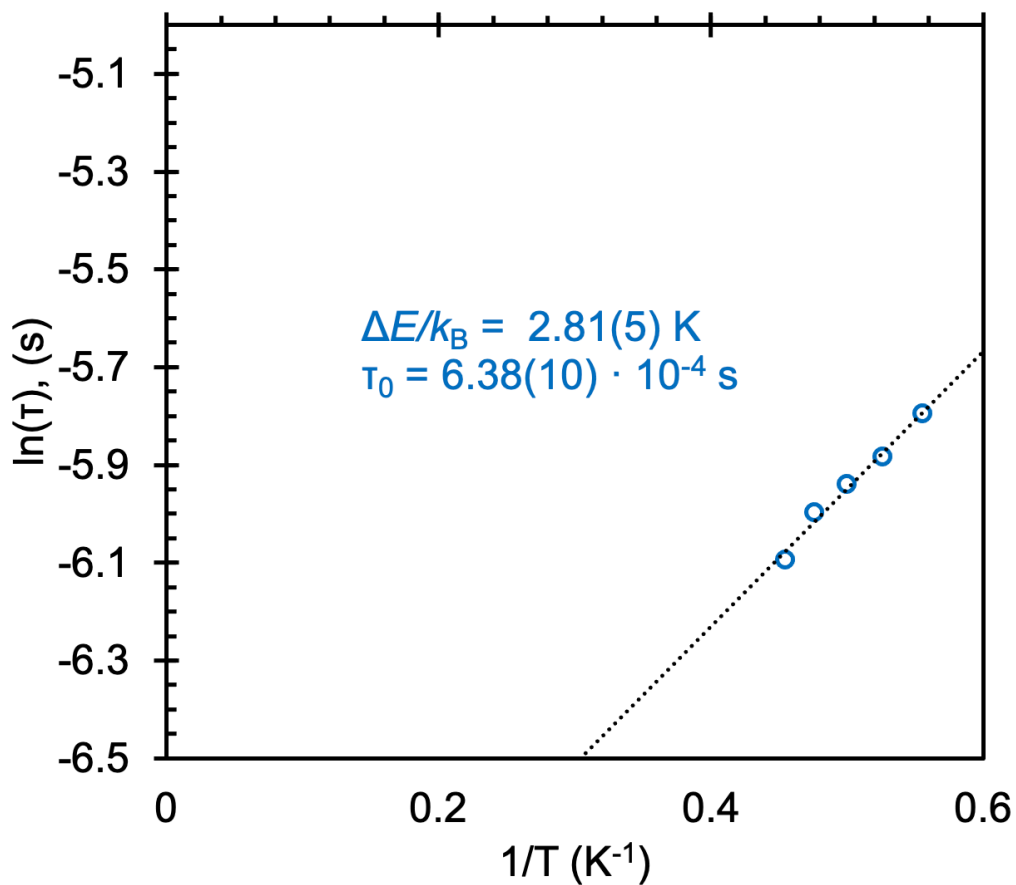

**Figure S57** Arrhenius plot of **4** in the temperature region 1.8-2.2 K under 0.2 T DC field, with the obtained parameters of  $\Delta E/k_B = 2.81(5) \text{ K}$ ,  $\tau_0 = 6.38(10) \cdot 10^{-4} \text{ s}$ . The fit is extended to show linearity.



## Computational data

All the DFT calculations were performed using Gaussian09 suite of programs.<sup>12</sup> Hybrid DFT functional (B3PW91) along with relativistic effective core potential and its associated basis sets for U, Si atoms with additional polarization functions for silicon atoms were employed.<sup>13,14</sup> Pople (6-31G\*\*) basis set were used for the rest of the atoms.<sup>15</sup> NBO analysis were carried out with the NBO6.0. CASSCF calculations were also conducted on complexes **2** and **4** by distributing either 7 or 5 electrons into 7 and 5 orbitals, respectively. In both cases, the active molecular orbitals were obtained by a ROHF calculation on the highest spin state (octet and sextet).

**Table S7** Different spin states computed with DFT for complexes **1-4**.

| <b>1: U<sub>2</sub>bpym</b>                | <b>ΔH (kcal/mol)</b> |
|--------------------------------------------|----------------------|
| s = 2                                      | 0.0                  |
| s = 3                                      | 7.3                  |
| <b>2: [U<sub>2</sub>bpym]<sup>1-</sup></b> | <b>ΔH (kcal/mol)</b> |
| s = 7/2                                    | 1.8                  |
| s = 5/2                                    | 0.0                  |
| <b>3: [U<sub>2</sub>bpym]<sup>2-</sup></b> | <b>ΔH (kcal/mol)</b> |
| s = 3                                      | 0.0                  |
| s = 2                                      | 16.0                 |
| <b>4: [U<sub>2</sub>bpym]<sup>1+</sup></b> | <b>ΔH (kcal/mol)</b> |
| s = 5/2                                    | 1.5                  |
| s = 3/2                                    | 0.0                  |
| s = 1/2                                    | 8.4                  |

**Table S8** Different spin states computed with CASSCF for complexes **1-4**.

| <b>2: [U<sub>2</sub>bpym]<sup>1-</sup></b> | <b>ΔH (kcal/mol)</b> |
|--------------------------------------------|----------------------|
| s = 7/2                                    | 2.3                  |
| s = 5/2                                    | 0.0                  |
| <b>4: [U<sub>2</sub>bpym]<sup>1+</sup></b> | <b>ΔH (kcal/mol)</b> |
| s = 5/2                                    | 2.1                  |
| s = 3/2                                    | 0.0                  |

**Table S9** DFT computed bond distances (Å) for complexes **1-4**.

| <b>Bond</b>  | <b>1</b> | <b>2</b> | <b>3</b> | <b>4</b> |
|--------------|----------|----------|----------|----------|
| <b>U1–N1</b> | 2.54     | 2.64     | 2.58     | 2.63     |
| <b>U1–N4</b> | 2.51     | 2.65     | 2.58     | 2.64     |
| <b>U2–N2</b> | 2.51     | 2.65     | 2.58     | 2.65     |
| <b>U2–N3</b> | 2.54     | 2.64     | 2.58     | 2.63     |
| <b>C1–C2</b> | 1.35     | 1.40     | 1.36     | 1.41     |

**Table S10** DFT computed spin density values for complexes **1-4**.

| <b>Atom Labels</b> | <b>1</b> | <b>2</b> | <b>3</b> | <b>4</b> |
|--------------------|----------|----------|----------|----------|
| <b>U1</b>          | 2.18     | 3.02     | 3.11     | 2.16     |
| <b>U2</b>          | 2.18     | 3.01     | 3.11     | 2.15     |
| <b>C1</b>          | 0.00     | -0.14    | 0.01     | -0.18    |
| <b>C2</b>          | 0.00     | -0.14    | 0.01     | -0.19    |

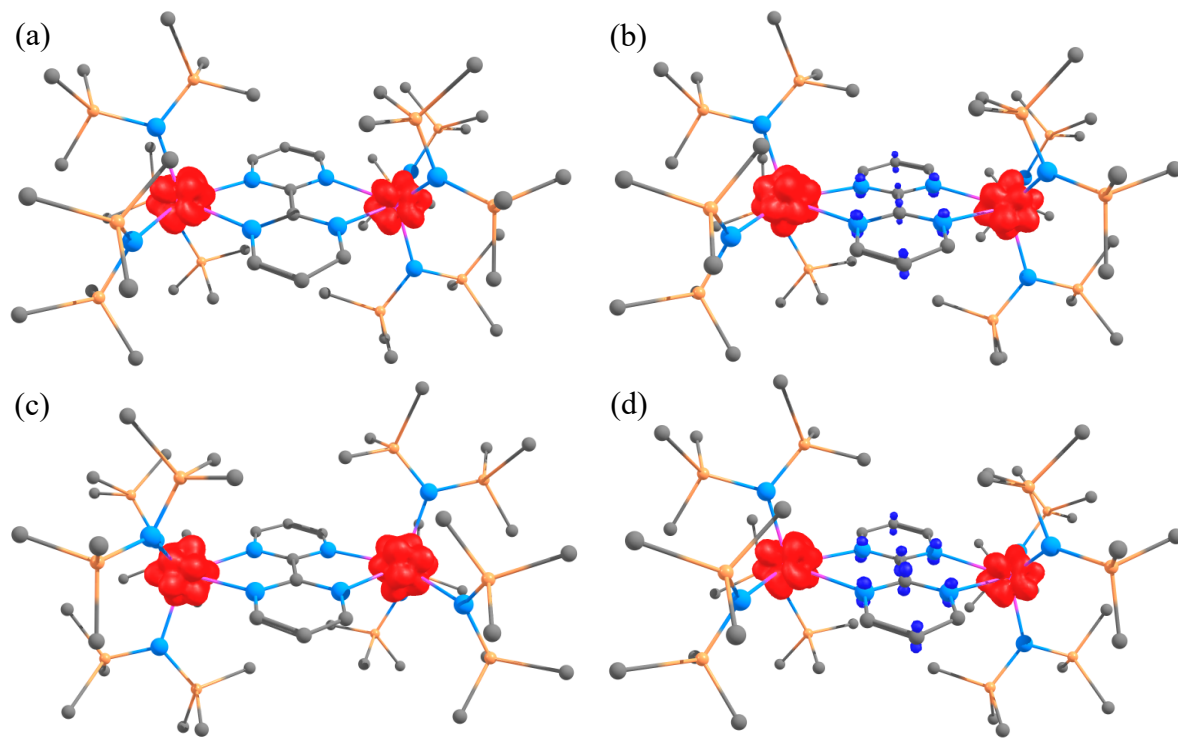

**Figure S58** DFT computed spin density plots for complexes (a) **1**, (b) **2**, (c) **3** and (d) **4**.

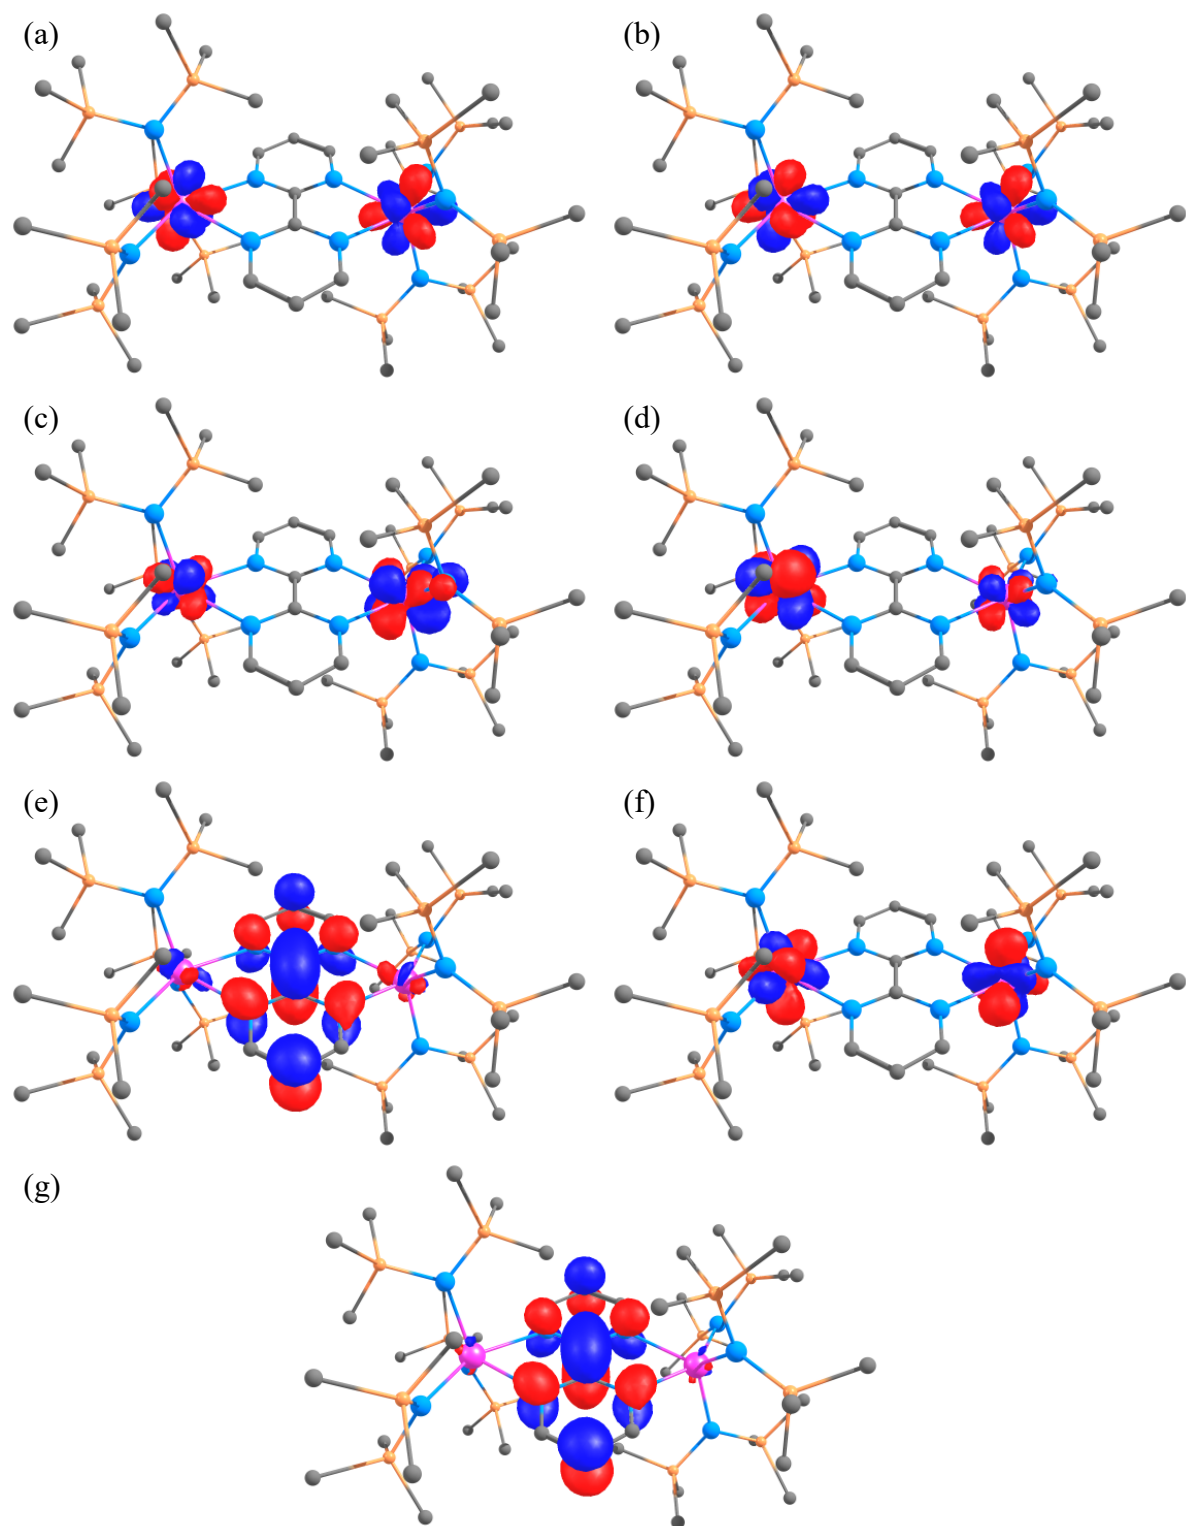

**Figure S59** DFT computed MO's for complex **1** (a) Alpha Molecular orbital, AMO-HOMO-4 (b) AMO-HOMO-3 (c) AMO-HOMO-2 (d) AMO-HOMO-1 (e) AMO-HOMO (f) AMO-LUMO (g) Beta Molecular orbital, BMO-HOMO.

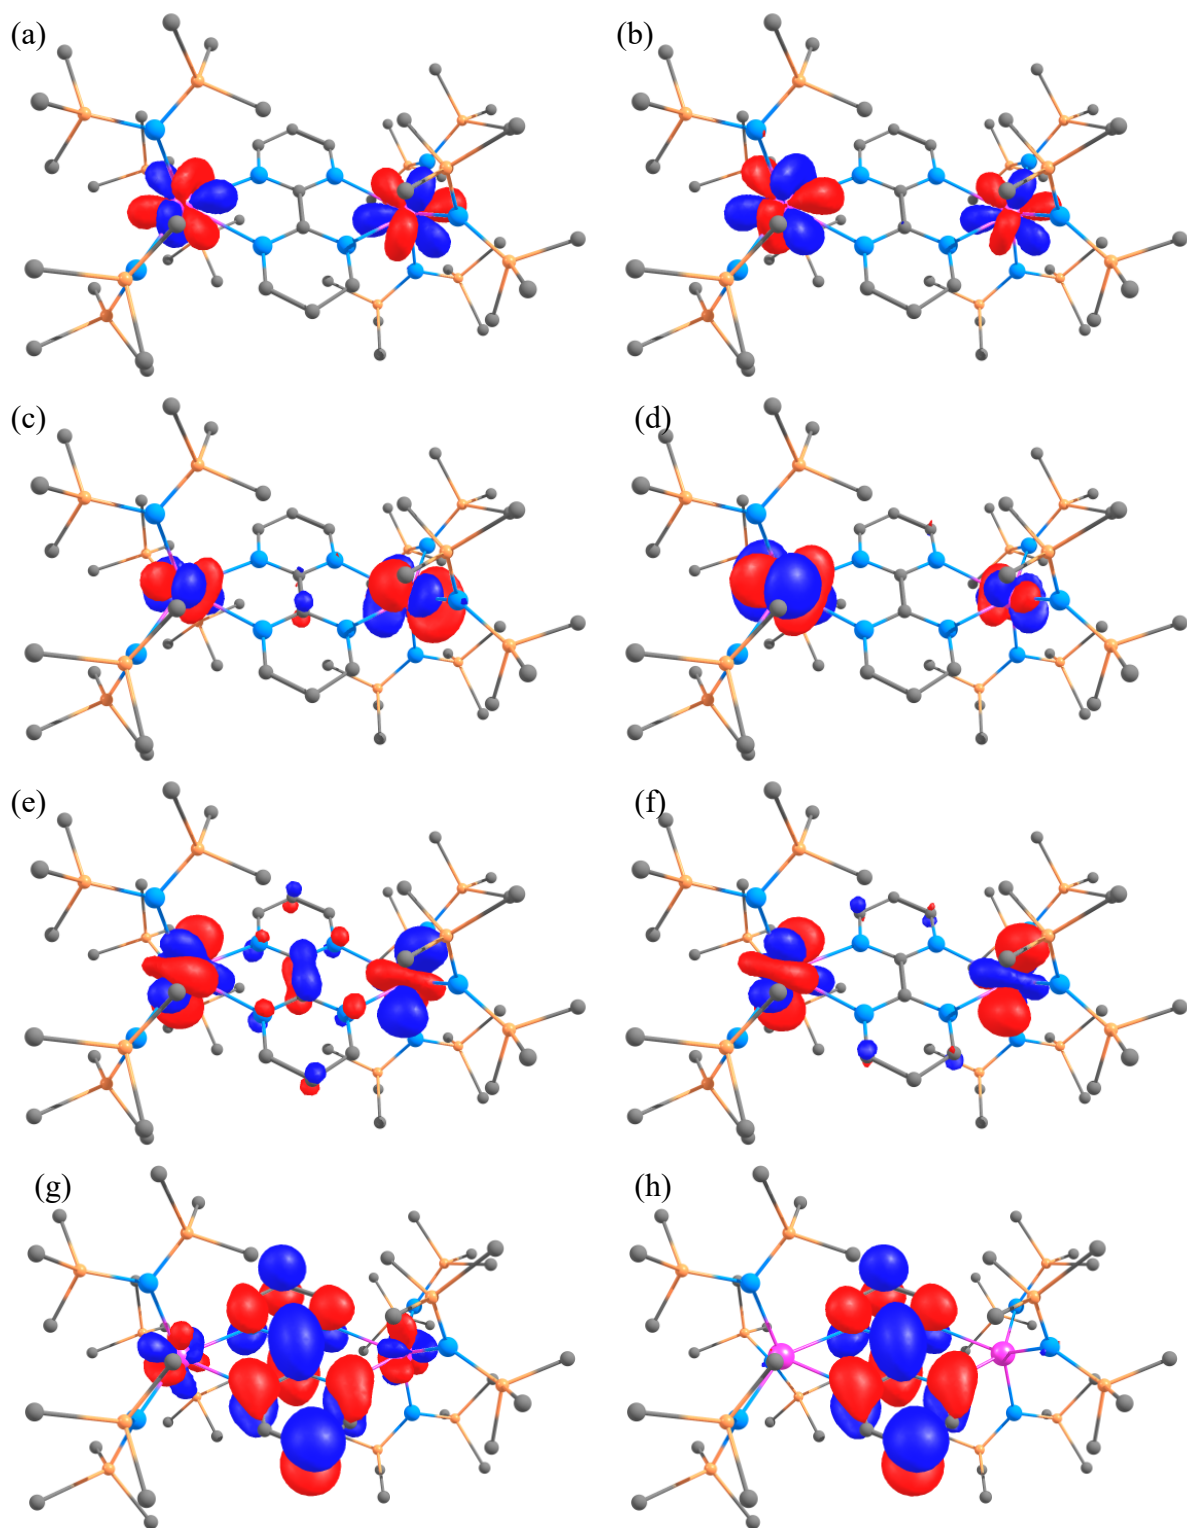

**Figure S60** DFT computed MO's for complex **2** (a) Alpha Molecular orbital, AMO-HOMO-5 (b) AMO-HOMO-4 (c) AMO-HOMO-3 (d) AMO-HOMO-2 (e) AMO-HOMO-1 (f) AMO-HOMO (g) AMO-LUMO (h) Beta Molecular orbital, BMO-HOMO

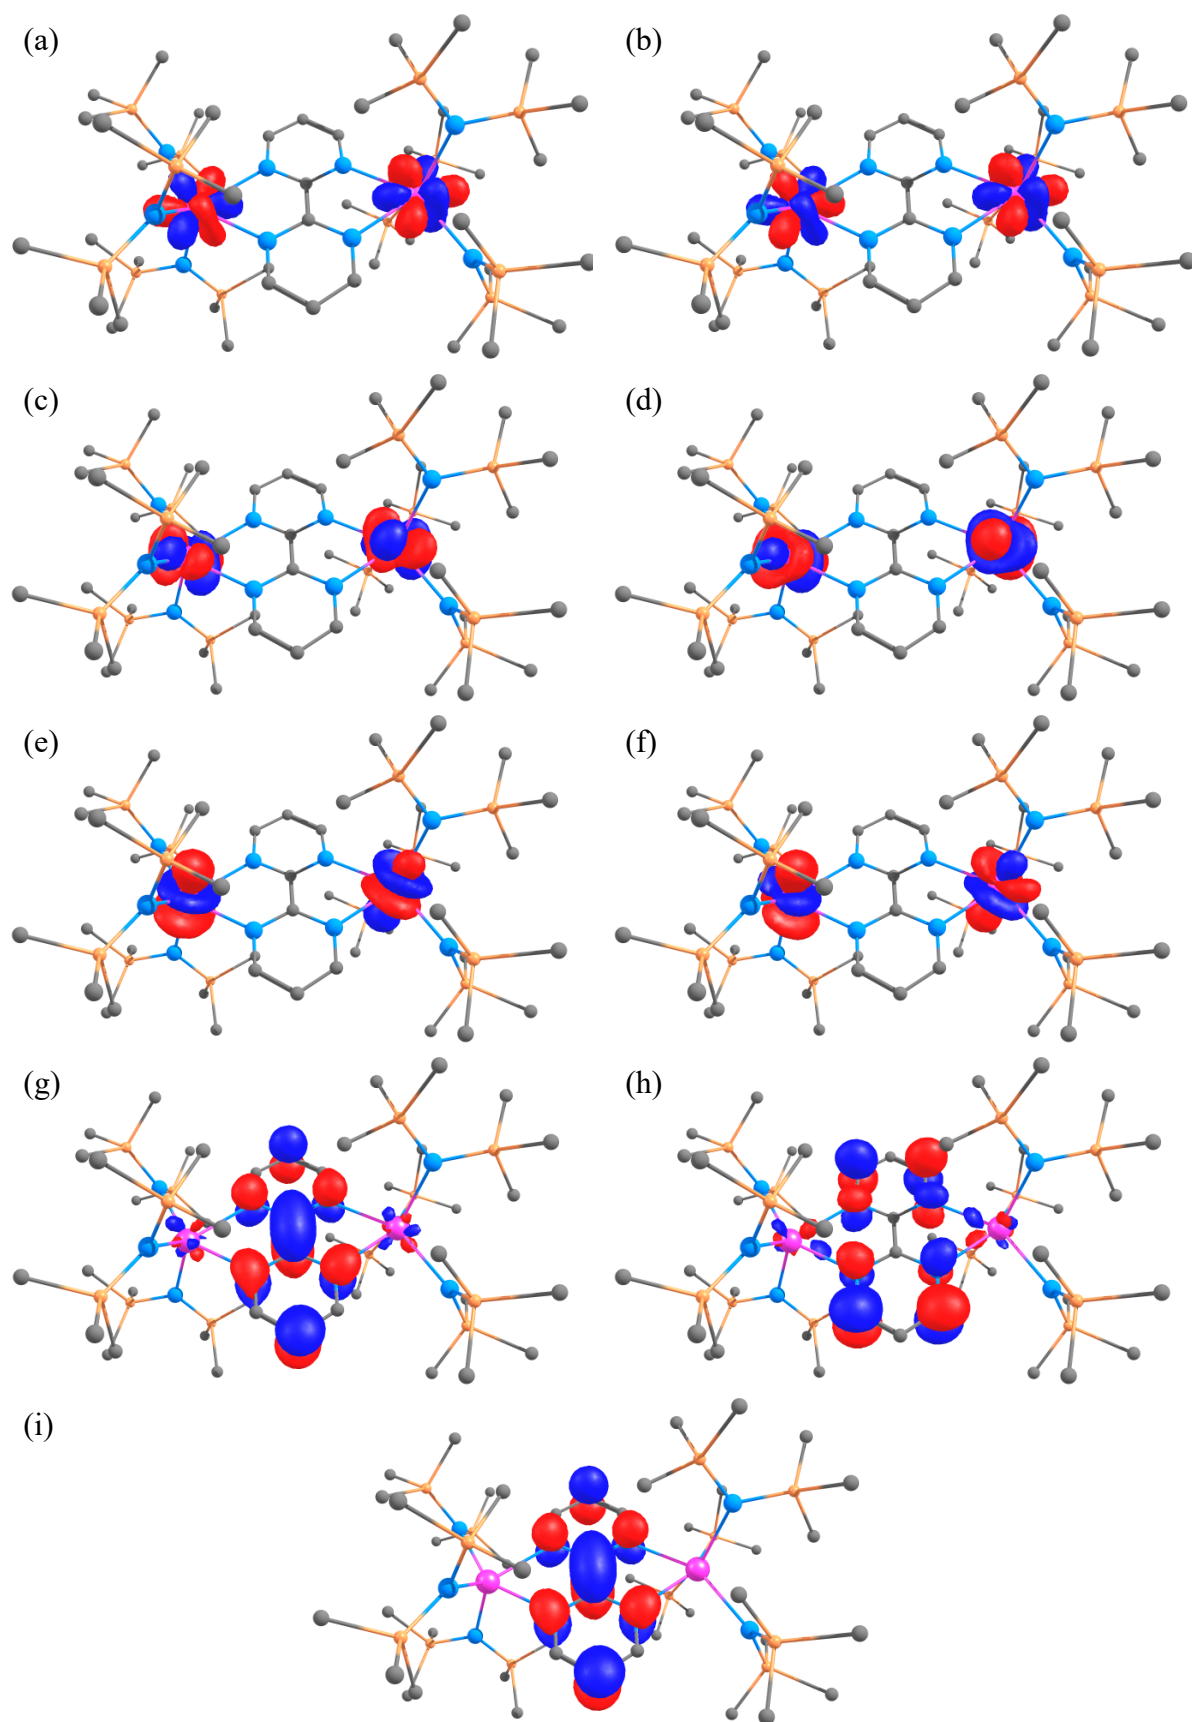

**Figure S61** DFT computed MO's for complex **3** (a) Alpha Molecular orbital, AMO-HOMO-6 (b) AMO-HOMO-5 (c) AMO-HOMO-4 (d) AMO-HOMO-3 (e) AMO-HOMO-2 (f) AMO-HOMO-1 (g) AMO-HOMO (h) AMO-LUMO (i) Beta Molecular orbital, BMO-HOMO.

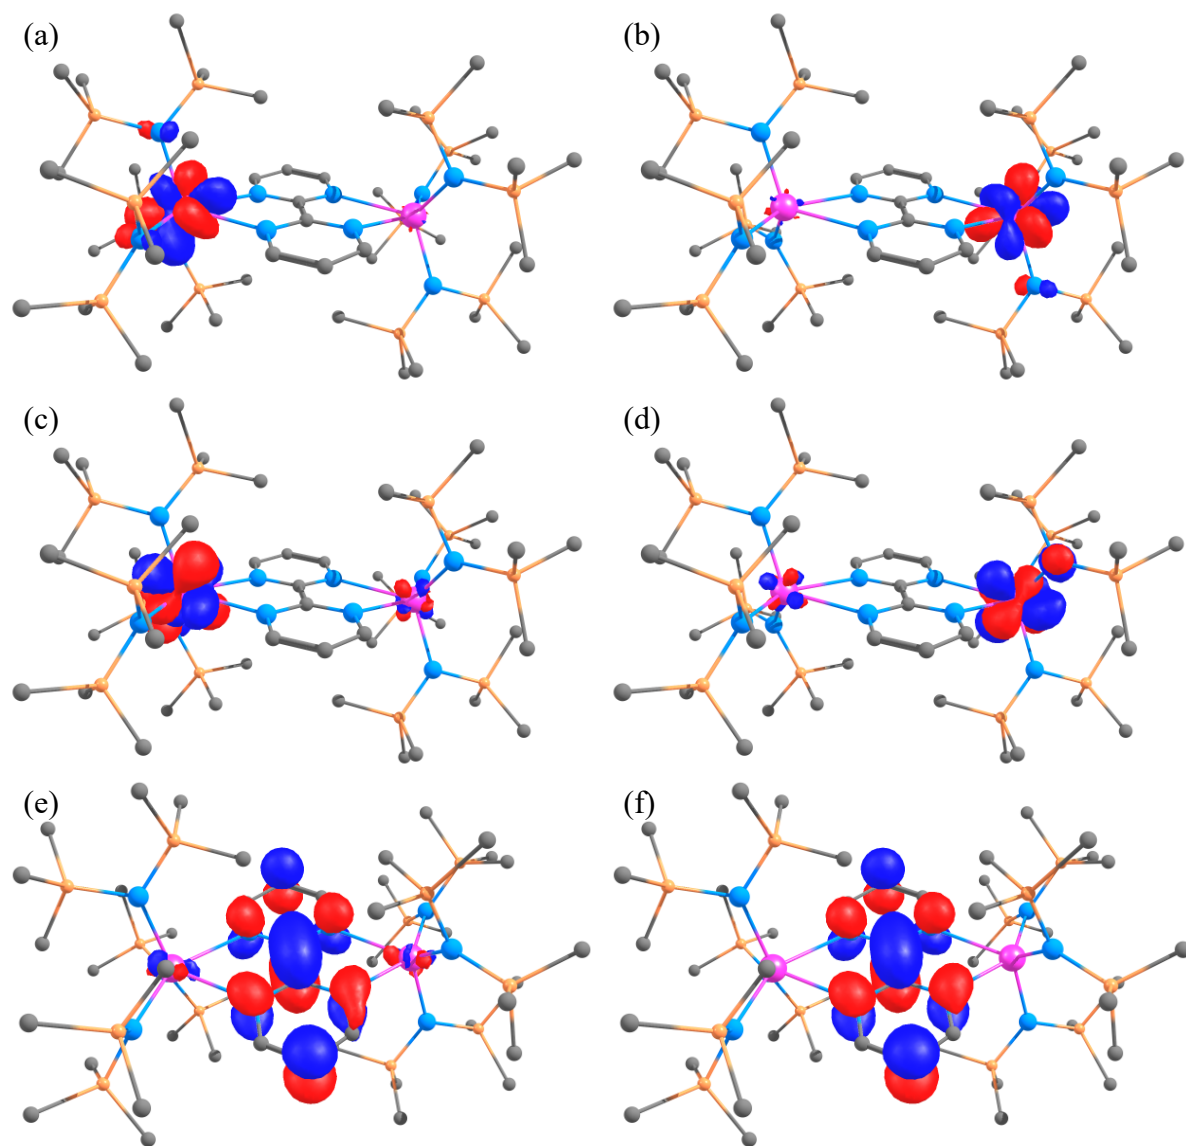

**Figure S62** DFT computed MO's for complex **4** (a) Alpha Molecular orbital, AMO-HOMO-3 (b) AMO-HOMO-2 (c) AMO-HOMO-1 (d) AMO-HOMO (e) AMO-LUMO (f) Beta Molecular orbital, BMO-HOMO.

## Optimized coordinates

### Complex 1 (s=2)

|    |              |              |              |    |              |              |              |
|----|--------------|--------------|--------------|----|--------------|--------------|--------------|
| U  | 7.721485000  | 0.555455000  | 9.437432000  | C  | 7.226209000  | -2.522198000 | 5.466787000  |
| Si | 10.858676000 | 0.891052000  | 10.922088000 | H  | 8.038418000  | -2.422843000 | 4.741184000  |
| Si | 9.451063000  | 3.520219000  | 10.794339000 | H  | 6.344576000  | -2.873531000 | 4.916336000  |
| Si | 9.604403000  | 0.036189000  | 6.369034000  | H  | 7.496008000  | -3.309439000 | 6.175763000  |
| Si | 6.749562000  | -0.865020000 | 6.283557000  | C  | 5.240699000  | -1.252489000 | 7.365843000  |
| Si | 5.560112000  | 3.019472000  | 8.039330000  | H  | 5.436000000  | -2.051724000 | 8.086342000  |
| Si | 4.347946000  | 1.459821000  | 10.304723000 | H  | 4.430258000  | -1.592876000 | 6.710583000  |
| N  | 7.392560000  | -0.035292000 | 11.887009000 | H  | 4.883005000  | -0.372742000 | 7.906529000  |
| N  | 6.957631000  | -1.810488000 | 13.565027000 | C  | 4.886729000  | 4.666402000  | 8.715687000  |
| N  | 9.403742000  | 1.782342000  | 10.372938000 | H  | 3.876518000  | 4.564691000  | 9.123874000  |
| N  | 8.055799000  | -0.112925000 | 7.261193000  | H  | 4.824399000  | 5.368114000  | 7.874707000  |
| N  | 5.788120000  | 1.740784000  | 9.273273000  | H  | 5.519813000  | 5.118805000  | 9.481276000  |
| C  | 7.253303000  | -1.388542000 | 12.243922000 | C  | 7.240541000  | 3.389397000  | 7.242592000  |
| C  | 6.729350000  | -0.835511000 | 14.444031000 | H  | 7.963161000  | 3.778934000  | 7.965271000  |
| H  | 6.442730000  | -1.166275000 | 15.437130000 | H  | 7.110146000  | 4.156199000  | 6.470434000  |
| C  | 6.852462000  | 0.521311000  | 14.153434000 | H  | 7.664622000  | 2.501920000  | 6.763682000  |
| H  | 6.687673000  | 1.278372000  | 14.908391000 | C  | 4.342853000  | 2.554249000  | 6.651249000  |
| C  | 7.220274000  | 0.858404000  | 12.839338000 | H  | 4.635824000  | 3.064080000  | 5.726373000  |
| H  | 7.369753000  | 1.897810000  | 12.556316000 | H  | 3.328004000  | 2.878572000  | 6.895160000  |
| C  | 10.987459000 | -0.752764000 | 9.989202000  | H  | 4.311988000  | 1.483492000  | 6.444468000  |
| H  | 10.077092000 | -1.359510000 | 10.001946000 | C  | 4.240354000  | 2.683160000  | 11.752576000 |
| H  | 11.765750000 | -1.354381000 | 10.471528000 | H  | 5.071480000  | 2.569049000  | 12.452905000 |
| H  | 11.294372000 | -0.587404000 | 8.954537000  | H  | 3.314628000  | 2.496786000  | 12.309884000 |
| C  | 12.496664000 | 1.775804000  | 10.521973000 | H  | 4.222633000  | 3.722109000  | 11.411953000 |
| H  | 12.591659000 | 1.976901000  | 9.450719000  | C  | 4.331920000  | -0.299716000 | 11.015179000 |
| H  | 13.319050000 | 1.108423000  | 10.806682000 | H  | 4.937324000  | -1.015352000 | 10.452159000 |
| H  | 12.639001000 | 2.716368000  | 11.059487000 | H  | 3.301860000  | -0.671192000 | 10.997233000 |
| C  | 10.843531000 | 0.486515000  | 12.773585000 | H  | 4.674425000  | -0.314171000 | 12.051767000 |
| H  | 10.836764000 | 1.378641000  | 13.403283000 | C  | 2.699016000  | 1.624067000  | 9.366050000  |
| H  | 11.740800000 | -0.091609000 | 13.022510000 | H  | 2.487779000  | 2.636935000  | 9.013893000  |
| H  | 9.971553000  | -0.120244000 | 13.029958000 | H  | 1.901065000  | 1.351522000  | 10.067647000 |
| C  | 10.382772000 | 4.534968000  | 9.486386000  | H  | 2.634054000  | 0.943694000  | 8.512046000  |
| H  | 11.436279000 | 4.245291000  | 9.438176000  | N  | 7.262721000  | -3.673924000 | 11.632464000 |
| H  | 10.339635000 | 5.599171000  | 9.746050000  | N  | 7.697362000  | -1.898608000 | 9.954553000  |
| H  | 9.963430000  | 4.417086000  | 8.483644000  | C  | 7.401627000  | -2.320649000 | 11.275603000 |
| C  | 10.278003000 | 3.915263000  | 12.465837000 | C  | 7.926661000  | -2.873499000 | 9.075688000  |
| H  | 9.746807000  | 3.445265000  | 13.299645000 | H  | 8.213661000  | -2.542531000 | 8.082757000  |
| H  | 10.208572000 | 5.000962000  | 12.608217000 | C  | 7.804175000  | -4.230348000 | 9.366302000  |
| H  | 11.333498000 | 3.644371000  | 12.537316000 | H  | 7.969763000  | -4.987371000 | 8.611481000  |
| C  | 7.702566000  | 4.231069000  | 11.009254000 | C  | 7.435866000  | -4.567562000 | 10.680253000 |
| H  | 7.677316000  | 5.265320000  | 10.649096000 | H  | 7.286688000  | -5.607022000 | 10.963219000 |
| H  | 7.431302000  | 4.251257000  | 12.070510000 | U  | 6.932607000  | -4.264655000 | 14.081973000 |
| H  | 6.931915000  | 3.664903000  | 10.483100000 | Si | 3.796358000  | -4.600212000 | 12.595719000 |
| C  | 10.630640000 | 1.488085000  | 7.033825000  | Si | 5.204310000  | -7.229262000 | 12.723107000 |
| H  | 10.289704000 | 2.415033000  | 6.560694000  | Si | 5.047554000  | -3.746819000 | 17.149413000 |
| H  | 11.683075000 | 1.346797000  | 6.762089000  | Si | 7.902175000  | -2.845732000 | 17.237412000 |
| H  | 10.570844000 | 1.634706000  | 8.114101000  | Si | 9.093567000  | -6.728912000 | 15.480659000 |
| C  | 10.605995000 | -1.581762000 | 6.430317000  | Si | 10.306618000 | -5.167958000 | 13.216562000 |
| H  | 10.709249000 | -1.995257000 | 7.436114000  | N  | 5.251116000  | -5.491547000 | 13.145260000 |
| H  | 11.613307000 | -1.410356000 | 6.033142000  | N  | 6.596750000  | -3.597275000 | 16.258291000 |
| H  | 10.134072000 | -2.345104000 | 5.804018000  | N  | 8.865950000  | -5.449778000 | 14.247103000 |
| C  | 9.439456000  | 0.431662000  | 4.514656000  | C  | 3.667368000  | -2.956624000 | 13.528950000 |
| H  | 9.012718000  | -0.382369000 | 3.923040000  | H  | 4.577539000  | -2.349576000 | 13.515907000 |
| H  | 10.454196000 | 0.609466000  | 4.137297000  | H  | 2.888746000  | -2.355186000 | 13.046938000 |
| H  | 8.856711000  | 1.337806000  | 4.327379000  | H  | 3.360829000  | -3.122142000 | 14.563693000 |
| C  | 6.169625000  | 0.223212000  | 4.831732000  | C  | 2.158266000  | -5.485173000 | 12.994940000 |
| H  | 6.276699000  | 1.291483000  | 5.028791000  | H  | 2.063047000  | -5.687114000 | 14.066010000 |
| H  | 5.111815000  | 0.026584000  | 4.624455000  | H  | 1.335954000  | -4.817542000 | 12.710601000 |
| H  | 6.728446000  | -0.008033000 | 3.921461000  | H  | 2.015978000  | -6.425314000 | 12.456661000 |
|    |              |              |              | C  | 3.812183000  | -4.195001000 | 10.744385000 |

|   |              |              |              |
|---|--------------|--------------|--------------|
| H | 3.818466000  | -5.086794000 | 10.114217000 |
| H | 2.915375000  | -3.616103000 | 10.495594000 |
| H | 4.684636000  | -3.588706000 | 10.488530000 |
| C | 4.272192000  | -8.244660000 | 14.030258000 |
| H | 3.218740000  | -7.954777000 | 14.078452000 |
| H | 4.315138000  | -9.308703000 | 13.769903000 |
| H | 4.691366000  | -8.127530000 | 15.033155000 |
| C | 4.378086000  | -7.623678000 | 11.051121000 |
| H | 4.909633000  | -7.153341000 | 10.217728000 |
| H | 4.447553000  | -8.709319000 | 10.908327000 |
| H | 3.322629000  | -7.352733000 | 10.979333000 |
| C | 6.953020000  | -7.939749000 | 12.508667000 |
| H | 6.978201000  | -8.974236000 | 12.868151000 |
| H | 7.224922000  | -7.959188000 | 11.447560000 |
| H | 7.723292000  | -7.373832000 | 13.035656000 |
| C | 4.021782000  | -5.198447000 | 16.483339000 |
| H | 4.362348000  | -6.125539000 | 16.956456000 |
| H | 2.969127000  | -5.057256000 | 16.754269000 |
| H | 4.082472000  | -5.344729000 | 15.403073000 |
| C | 4.046314000  | -2.128658000 | 17.088275000 |
| H | 3.944183000  | -1.714384000 | 16.082686000 |
| H | 3.038583000  | -2.300016000 | 17.484402000 |
| H | 4.517944000  | -1.365952000 | 17.715572000 |
| C | 5.211120000  | -4.143237000 | 19.003726000 |
| H | 5.637302000  | -3.329505000 | 19.596150000 |
| H | 4.196053000  | -4.321259000 | 19.380110000 |
| H | 5.793708000  | -5.049471000 | 19.191054000 |
| C | 8.481331000  | -3.934929000 | 18.688814000 |
| H | 8.374688000  | -5.003076000 | 18.490850000 |
| H | 9.538931000  | -3.738194000 | 18.897045000 |
| H | 7.921745000  | -3.704521000 | 19.598827000 |
| C | 7.424470000  | -1.189357000 | 18.055221000 |
| H | 6.613633000  | -1.290229000 | 18.782145000 |
| H | 8.306468000  | -0.836761000 | 18.604272000 |
| H | 7.152116000  | -0.402374000 | 17.346954000 |
| C | 9.411710000  | -2.457132000 | 16.156432000 |
| H | 9.216850000  | -1.657232000 | 15.436552000 |
| H | 10.221711000 | -2.117347000 | 16.812549000 |
| H | 9.769797000  | -3.336349000 | 15.615133000 |
| C | 9.767532000  | -8.375438000 | 14.803910000 |
| H | 10.778033000 | -8.273409000 | 14.396513000 |
| H | 9.829312000  | -9.077601000 | 15.644554000 |
| H | 9.135040000  | -8.827485000 | 14.037620000 |
| C | 7.412804000  | -7.099353000 | 16.276428000 |
| H | 6.690715000  | -7.488968000 | 15.553263000 |
| H | 7.542885000  | -7.866211000 | 17.048581000 |
| H | 6.988217000  | -6.212016000 | 16.755153000 |
| C | 10.310158000 | -6.264059000 | 16.869455000 |
| H | 10.016947000 | -6.774411000 | 17.793967000 |
| H | 11.325179000 | -6.588032000 | 16.625792000 |
| H | 10.340713000 | -5.193398000 | 17.076777000 |
| C | 10.415504000 | -6.390604000 | 11.768224000 |
| H | 9.585058000  | -6.276119000 | 11.067152000 |
| H | 11.341762000 | -6.203932000 | 11.211900000 |
| H | 10.432915000 | -7.429725000 | 12.108339000 |
| C | 10.322444000 | -3.408015000 | 12.507024000 |
| H | 9.715427000  | -2.693126000 | 13.069260000 |
| H | 11.352139000 | -3.035638000 | 12.526933000 |
| H | 9.981702000  | -3.393371000 | 11.469857000 |
| C | 11.955071000 | -5.332121000 | 14.156068000 |
| H | 12.166377000 | -6.345025000 | 14.508071000 |
| H | 12.753321000 | -5.059184000 | 13.454963000 |
| H | 12.019378000 | -4.651938000 | 15.010274000 |

**Complex 1 (s=3)**

|    |              |              |              |
|----|--------------|--------------|--------------|
| U  | 7.725342000  | 0.570346000  | 9.426697000  |
| Si | 10.881764000 | 0.901184000  | 10.845121000 |
| Si | 9.515759000  | 3.553667000  | 10.708707000 |
| Si | 9.579824000  | -0.000856000 | 6.324048000  |
| Si | 6.712684000  | -0.844570000 | 6.279336000  |
| Si | 5.534560000  | 3.018039000  | 8.087838000  |
| Si | 4.347395000  | 1.491822000  | 10.381587000 |
| N  | 7.457272000  | -0.070528000 | 11.835368000 |
| N  | 7.051732000  | -1.787330000 | 13.513467000 |
| N  | 9.433958000  | 1.810816000  | 10.322797000 |
| N  | 8.045608000  | -0.127343000 | 7.238691000  |
| N  | 5.773338000  | 1.745599000  | 9.326528000  |
| C  | 7.303396000  | -1.371687000 | 12.230662000 |
| C  | 6.855328000  | -0.804488000 | 14.426768000 |
| H  | 6.588027000  | -1.135586000 | 15.422222000 |
| C  | 7.004023000  | 0.543028000  | 14.105856000 |
| H  | 6.875093000  | 1.309591000  | 14.860828000 |
| C  | 7.340455000  | 0.874151000  | 12.800736000 |
| H  | 7.511186000  | 1.899118000  | 12.492412000 |
| C  | 10.926943000 | -0.768705000 | 9.945348000  |
| H  | 10.008348000 | -1.360980000 | 9.997157000  |
| H  | 11.705941000 | -1.378889000 | 10.415220000 |
| H  | 11.203461000 | -0.635620000 | 8.897693000  |
| C  | 12.529367000 | 1.723477000  | 10.364463000 |
| H  | 12.596197000 | 1.895099000  | 9.286253000  |
| H  | 13.343491000 | 1.043459000  | 10.642747000 |
| H  | 12.710957000 | 2.673624000  | 10.872580000 |
| C  | 10.943839000 | 0.544584000  | 12.706146000 |
| H  | 11.035169000 | 1.454120000  | 13.303727000 |
| H  | 11.815931000 | -0.084081000 | 12.919278000 |
| H  | 10.053954000 | 0.005327000  | 13.039728000 |
| C  | 10.407992000 | 4.542802000  | 9.353906000  |
| H  | 11.455362000 | 4.238077000  | 9.271315000  |
| H  | 10.389503000 | 5.610000000  | 9.604207000  |
| H  | 9.951850000  | 4.421931000  | 8.367584000  |
| C  | 10.409321000 | 3.970925000  | 12.340194000 |
| H  | 9.917874000  | 3.505652000  | 13.200537000 |
| H  | 10.338450000 | 5.057562000  | 12.474272000 |
| H  | 11.469390000 | 3.708890000  | 12.368511000 |
| C  | 7.779468000  | 4.274670000  | 10.978454000 |
| H  | 7.749595000  | 5.313763000  | 10.632918000 |
| H  | 7.533510000  | 4.280895000  | 12.046142000 |
| H  | 6.993567000  | 3.718712000  | 10.464373000 |
| C  | 10.626998000 | 1.449028000  | 6.959786000  |
| H  | 10.281842000 | 2.373850000  | 6.485155000  |
| H  | 11.674414000 | 1.302353000  | 6.672100000  |
| H  | 10.584758000 | 1.605161000  | 8.039537000  |
| C  | 10.568269000 | -1.628590000 | 6.378930000  |
| H  | 10.672476000 | -2.046754000 | 7.382968000  |
| H  | 11.575286000 | -1.467800000 | 5.976765000  |
| H  | 10.085141000 | -2.385630000 | 5.752992000  |
| C  | 9.394173000  | 0.383325000  | 4.468588000  |
| H  | 8.944400000  | -0.426195000 | 3.887923000  |
| H  | 10.405896000 | 0.541443000  | 4.074739000  |
| H  | 8.824615000  | 1.298567000  | 4.284696000  |
| C  | 6.117790000  | 0.259803000  | 4.846013000  |
| H  | 6.225998000  | 1.325922000  | 5.054340000  |
| H  | 5.058176000  | 0.064789000  | 4.646323000  |
| H  | 6.668159000  | 0.039472000  | 3.927962000  |
| C  | 7.138892000  | -2.505553000 | 5.439906000  |
| H  | 7.942833000  | -2.414901000 | 4.704040000  |



|    |              |              |              |                          |              |              |              |
|----|--------------|--------------|--------------|--------------------------|--------------|--------------|--------------|
| H  | 6.242942000  | -2.833793000 | 4.898470000  | H                        | 4.374810000  | -9.359591000 | 13.722410000 |
| H  | 7.404065000  | -3.307038000 | 6.134790000  | H                        | 4.755315000  | -8.195319000 | 14.999695000 |
| C  | 5.222848000  | -1.208506000 | 7.397593000  | C                        | 4.435740000  | -7.669656000 | 11.025286000 |
| H  | 5.419594000  | -2.017267000 | 8.107379000  | H                        | 4.953049000  | -7.185299000 | 10.190807000 |
| H  | 4.385556000  | -1.526743000 | 6.765774000  | H                        | 4.521502000  | -8.753114000 | 10.875729000 |
| H  | 4.900405000  | -0.324094000 | 7.953494000  | H                        | 3.375024000  | -7.415600000 | 10.961771000 |
| C  | 4.883670000  | 4.674154000  | 8.762998000  | C                        | 7.020316000  | -7.943962000 | 12.492601000 |
| H  | 3.877545000  | 4.583060000  | 9.183364000  | H                        | 7.070126000  | -8.973083000 | 12.864443000 |
| H  | 4.817700000  | 5.372260000  | 7.919343000  | H                        | 7.296269000  | -7.969809000 | 11.432348000 |
| H  | 5.529444000  | 5.124692000  | 9.518978000  | H                        | 7.776613000  | -7.354222000 | 13.015047000 |
| C  | 7.209290000  | 3.369622000  | 7.269474000  | C                        | 3.930453000  | -5.251523000 | 16.435838000 |
| H  | 7.943045000  | 3.753732000  | 7.983859000  | H                        | 4.272133000  | -6.178107000 | 16.909603000 |
| H  | 7.076889000  | 4.138283000  | 6.499455000  | H                        | 2.867136000  | -5.132410000 | 16.673561000 |
| H  | 7.622645000  | 2.480126000  | 6.784342000  | H                        | 4.031751000  | -5.384580000 | 15.357005000 |
| C  | 4.296657000  | 2.554688000  | 6.718089000  | C                        | 3.904124000  | -2.181251000 | 17.068107000 |
| H  | 4.570403000  | 3.073699000  | 5.792448000  | H                        | 3.892108000  | -1.719605000 | 16.077855000 |
| H  | 3.284269000  | 2.870440000  | 6.982050000  | H                        | 2.865823000  | -2.371399000 | 17.363848000 |
| H  | 4.269079000  | 1.485385000  | 6.503463000  | H                        | 4.314146000  | -1.447498000 | 17.769400000 |
| C  | 4.293228000  | 2.719592000  | 11.827602000 | C                        | 5.017495000  | -4.207153000 | 19.000608000 |
| H  | 5.155706000  | 2.605187000  | 12.489508000 | H                        | 5.422149000  | -3.400310000 | 19.617399000 |
| H  | 3.392031000  | 2.537185000  | 12.424851000 | H                        | 3.991100000  | -4.391782000 | 19.341501000 |
| H  | 4.263357000  | 3.757367000  | 11.484301000 | H                        | 5.595816000  | -5.114698000 | 19.196003000 |
| C  | 4.300801000  | -0.260649000 | 11.106483000 | C                        | 8.319735000  | -4.000538000 | 18.775861000 |
| H  | 4.717069000  | -1.019225000 | 10.437808000 | H                        | 8.282210000  | -5.064961000 | 18.535247000 |
| H  | 3.252023000  | -0.525507000 | 11.279356000 | H                        | 9.353350000  | -3.756391000 | 19.046230000 |
| H  | 4.815322000  | -0.321326000 | 12.066979000 | H                        | 7.701809000  | -3.834986000 | 19.661846000 |
| C  | 2.683582000  | 1.668260000  | 9.471713000  | C                        | 7.249982000  | -1.252296000 | 18.155413000 |
| H  | 2.480219000  | 2.678583000  | 9.108123000  | H                        | 6.451515000  | -1.383062000 | 18.891422000 |
| H  | 1.894379000  | 1.417879000  | 10.191109000 | H                        | 8.124959000  | -0.867122000 | 18.693359000 |
| H  | 2.592768000  | 0.976548000  | 8.629115000  | H                        | 6.934084000  | -0.475360000 | 17.453315000 |
| N  | 7.275932000  | -3.665284000 | 11.618294000 | C                        | 9.295552000  | -2.489808000 | 16.289963000 |
| N  | 7.658941000  | -1.939514000 | 9.945389000  | H                        | 9.107212000  | -1.700237000 | 15.556276000 |
| C  | 7.412002000  | -2.359638000 | 11.232423000 | H                        | 10.082190000 | -2.129297000 | 16.963019000 |
| C  | 7.865999000  | -2.914386000 | 9.038194000  | H                        | 9.680281000  | -3.369021000 | 15.766491000 |
| H  | 8.122456000  | -2.576535000 | 8.041411000  | C                        | 9.821394000  | -8.325939000 | 14.813543000 |
| C  | 7.751148000  | -4.262618000 | 9.352250000  | H                        | 10.838525000 | -8.221658000 | 14.423606000 |
| H  | 7.900947000  | -5.026956000 | 8.599595000  | H                        | 9.868324000  | -9.036647000 | 15.647970000 |
| C  | 7.421318000  | -4.595862000 | 10.667578000 | H                        | 9.202260000  | -8.770762000 | 14.032187000 |
| H  | 7.277742000  | -5.625323000 | 10.976603000 | C                        | 7.423512000  | -7.068992000 | 16.226444000 |
| U  | 6.935070000  | -4.264077000 | 14.103136000 | H                        | 6.721540000  | -7.432035000 | 15.469816000 |
| Si | 3.837717000  | -4.638509000 | 12.566927000 | H                        | 7.525745000  | -7.861706000 | 16.976453000 |
| Si | 5.256912000  | -7.263424000 | 12.698310000 | H                        | 6.985879000  | -6.196294000 | 16.721023000 |
| Si | 4.918888000  | -3.793266000 | 17.143279000 | C                        | 10.297733000 | -6.247662000 | 16.931376000 |
| Si | 7.758144000  | -2.897075000 | 17.328389000 | H                        | 9.989758000  | -6.800091000 | 17.826666000 |
| Si | 9.130023000  | -6.685209000 | 15.491404000 | H                        | 11.326748000 | -6.539595000 | 16.706320000 |
| Si | 10.401896000 | -5.087432000 | 13.300134000 | H                        | 10.297561000 | -5.185400000 | 17.181638000 |
| N  | 5.281892000  | -5.530327000 | 13.111841000 | C                        | 10.506477000 | -6.225045000 | 11.783230000 |
| N  | 6.487763000  | -3.626119000 | 16.305847000 | H                        | 9.713084000  | -6.020555000 | 11.059455000 |
| N  | 8.934354000  | -5.391449000 | 14.273506000 | H                        | 11.465411000 | -6.075140000 | 11.273663000 |
| C  | 3.744614000  | -2.986727000 | 13.494483000 | H                        | 10.439513000 | -7.278556000 | 12.069081000 |
| H  | 4.664090000  | -2.391965000 | 13.483301000 | C                        | 10.515529000 | -3.292099000 | 12.707618000 |
| H  | 2.980144000  | -2.368559000 | 13.011712000 | H                        | 10.467173000 | -2.587747000 | 13.542448000 |
| H  | 3.435451000  | -3.141189000 | 14.529604000 | H                        | 11.490179000 | -3.161481000 | 12.223671000 |
| C  | 2.184608000  | -5.497359000 | 12.960203000 | H                        | 9.751085000  | -3.018678000 | 11.979568000 |
| H  | 2.080826000  | -5.705021000 | 14.029037000 | C                        | 12.032439000 | -5.334517000 | 14.255100000 |
| H  | 1.369893000  | -4.821726000 | 12.673036000 | H                        | 12.213939000 | -6.366474000 | 14.565774000 |
| H  | 2.038266000  | -6.433861000 | 12.415821000 | H                        | 12.850877000 | -5.049040000 | 13.583097000 |
| C  | 3.827541000  | -4.233224000 | 10.711577000 | H                        | 12.094721000 | -4.695397000 | 15.140615000 |
| H  | 3.800781000  | -5.127746000 | 10.085284000 |                          |              |              |              |
| H  | 2.936868000  | -3.637573000 | 10.480420000 |                          |              |              |              |
| H  | 4.704243000  | -3.645423000 | 10.427713000 |                          |              |              |              |
| C  | 4.332958000  | -8.298877000 | 13.996472000 |                          |              |              |              |
| H  | 3.279412000  | -8.009456000 | 14.051894000 |                          |              |              |              |
|    |              |              |              | <b>Complex 2 (s=5/2)</b> |              |              |              |
|    |              |              |              | U                        | 7.708237000  | 0.659038000  | 9.367552000  |
|    |              |              |              | Si                       | 10.870423000 | 1.017594000  | 10.914209000 |

|    |              |              |              |    |              |              |              |
|----|--------------|--------------|--------------|----|--------------|--------------|--------------|
| Si | 9.485730000  | 3.654705000  | 10.736503000 | H  | 4.470219000  | -1.464895000 | 6.457661000  |
| Si | 9.677728000  | 0.076430000  | 6.277143000  | H  | 4.927875000  | -0.237914000 | 7.655150000  |
| Si | 6.825897000  | -0.758328000 | 6.090882000  | C  | 4.859857000  | 4.805391000  | 8.626363000  |
| Si | 5.480158000  | 3.127168000  | 7.955630000  | H  | 3.855202000  | 4.730124000  | 9.054691000  |
| Si | 4.257632000  | 1.535664000  | 10.184053000 | H  | 4.806451000  | 5.519580000  | 7.795092000  |
| N  | 7.431740000  | -0.050099000 | 11.892648000 | H  | 5.520335000  | 5.226326000  | 9.388230000  |
| N  | 7.032724000  | -1.791562000 | 13.554453000 | C  | 7.172039000  | 3.462127000  | 7.157605000  |
| N  | 9.456886000  | 1.930436000  | 10.378630000 | H  | 7.881691000  | 3.875056000  | 7.881231000  |
| N  | 8.113759000  | -0.064969000 | 7.081022000  | H  | 7.065725000  | 4.197694000  | 6.351656000  |
| N  | 5.663788000  | 1.855945000  | 9.164041000  | H  | 7.602851000  | 2.552083000  | 6.725841000  |
| C  | 7.277069000  | -1.371122000 | 12.260232000 | C  | 4.256074000  | 2.718363000  | 6.548450000  |
| C  | 6.880471000  | -0.838761000 | 14.469776000 | H  | 4.489054000  | 3.328245000  | 5.667209000  |
| H  | 6.637628000  | -1.189909000 | 15.468437000 | H  | 3.227094000  | 2.944519000  | 6.841895000  |
| C  | 7.026675000  | 0.520947000  | 14.181959000 | H  | 4.296140000  | 1.669128000  | 6.247880000  |
| H  | 6.921668000  | 1.277131000  | 14.949541000 | C  | 4.245489000  | 2.603667000  | 11.760160000 |
| C  | 7.327968000  | 0.854538000  | 12.859127000 | H  | 5.081386000  | 2.363956000  | 12.423121000 |
| H  | 7.489846000  | 1.886621000  | 12.559111000 | H  | 3.319303000  | 2.443653000  | 12.324985000 |
| C  | 10.887524000 | -0.700181000 | 10.107621000 | H  | 4.310583000  | 3.667471000  | 11.510390000 |
| H  | 10.001179000 | -1.300084000 | 10.334581000 | C  | 4.157129000  | -0.289366000 | 10.692617000 |
| H  | 11.750437000 | -1.255919000 | 10.492219000 | H  | 3.881597000  | -0.914678000 | 9.838214000  |
| H  | 10.999367000 | -0.632797000 | 9.022876000  | H  | 3.379586000  | -0.405777000 | 11.456010000 |
| C  | 12.540740000 | 1.800353000  | 10.416395000 | H  | 5.083451000  | -0.686174000 | 11.114167000 |
| H  | 12.615890000 | 1.928483000  | 9.332345000  | C  | 2.565108000  | 1.854208000  | 9.355515000  |
| H  | 13.355899000 | 1.138139000  | 10.732733000 | H  | 2.387727000  | 2.905341000  | 9.109506000  |
| H  | 12.710707000 | 2.774971000  | 10.883209000 | H  | 1.782877000  | 1.546459000  | 10.060493000 |
| C  | 10.963885000 | 0.713144000  | 12.790680000 | H  | 2.439191000  | 1.263396000  | 8.443184000  |
| H  | 11.050034000 | 1.638949000  | 13.365082000 | N  | 7.207531000  | -3.662456000 | 11.624395000 |
| H  | 11.844275000 | 0.098792000  | 13.013621000 | N  | 7.608902000  | -1.921349000 | 9.962258000  |
| H  | 10.084141000 | 0.171333000  | 13.148364000 | C  | 7.363456000  | -2.341386000 | 11.256492000 |
| C  | 10.346646000 | 4.672913000  | 9.373932000  | C  | 7.753459000  | -2.874239000 | 9.045809000  |
| H  | 11.402061000 | 4.393682000  | 9.293011000  | H  | 7.995403000  | -2.523939000 | 8.046663000  |
| H  | 10.298134000 | 5.743475000  | 9.607168000  | C  | 7.601703000  | -4.233577000 | 9.333071000  |
| H  | 9.893418000  | 4.520630000  | 8.390278000  | H  | 7.700841000  | -4.989641000 | 8.564601000  |
| C  | 10.374770000 | 4.150401000  | 12.356956000 | C  | 7.305594000  | -4.567021000 | 10.657125000 |
| H  | 9.903202000  | 3.689150000  | 13.231004000 | H  | 7.143122000  | -5.598863000 | 10.957661000 |
| H  | 10.283530000 | 5.237968000  | 12.471469000 | U  | 6.940307000  | -4.367798000 | 14.149807000 |
| H  | 11.440753000 | 3.907029000  | 12.379592000 | Si | 3.781119000  | -4.747427000 | 12.612081000 |
| C  | 7.729082000  | 4.339473000  | 10.991704000 | Si | 5.173146000  | -7.381755000 | 12.799324000 |
| H  | 7.690980000  | 5.403827000  | 10.732264000 | Si | 4.979680000  | -3.791362000 | 17.247990000 |
| H  | 7.434964000  | 4.251530000  | 12.044124000 | Si | 7.826257000  | -2.934722000 | 17.420502000 |
| H  | 6.977473000  | 3.811439000  | 10.400067000 | Si | 9.183649000  | -6.818742000 | 15.556741000 |
| C  | 10.691240000 | 1.520758000  | 6.985280000  | Si | 10.393864000 | -5.229779000 | 13.320216000 |
| H  | 10.348858000 | 2.456882000  | 6.530041000  | N  | 5.198087000  | -5.655276000 | 13.146277000 |
| H  | 11.752116000 | 1.399036000  | 6.736136000  | N  | 6.538158000  | -3.635889000 | 16.435742000 |
| H  | 10.601830000 | 1.640509000  | 8.068002000  | N  | 8.991978000  | -5.551230000 | 14.345924000 |
| C  | 10.695728000 | -1.537722000 | 6.371208000  | C  | 3.790735000  | -3.012654000 | 13.381745000 |
| H  | 10.769823000 | -1.939259000 | 7.385401000  | H  | 4.626804000  | -2.394920000 | 13.042538000 |
| H  | 11.714087000 | -1.375864000 | 5.998071000  | H  | 2.871749000  | -2.494558000 | 13.084084000 |
| H  | 10.233841000 | -2.309417000 | 5.746047000  | H  | 3.801944000  | -3.051912000 | 14.473878000 |
| C  | 9.626708000  | 0.478418000  | 4.407739000  | C  | 2.116453000  | -5.517290000 | 13.147616000 |
| H  | 9.205349000  | -0.324221000 | 3.795339000  | H  | 2.049615000  | -5.615102000 | 14.235246000 |
| H  | 10.658817000 | 0.639346000  | 4.071581000  | H  | 1.296290000  | -4.867777000 | 12.818164000 |
| H  | 9.065294000  | 1.395406000  | 4.203798000  | H  | 1.946645000  | -6.505865000 | 12.710677000 |
| C  | 6.265800000  | 0.352769000  | 4.641374000  | C  | 3.655888000  | -4.476849000 | 10.731915000 |
| H  | 6.246862000  | 1.410081000  | 4.916232000  | H  | 3.510106000  | -5.409051000 | 10.180435000 |
| H  | 5.254107000  | 0.071670000  | 4.325287000  | H  | 2.799649000  | -3.825825000 | 10.518910000 |
| H  | 6.924315000  | 0.243552000  | 3.775487000  | H  | 4.549878000  | -3.985186000 | 10.338806000 |
| C  | 7.275818000  | -2.421658000 | 5.251231000  | C  | 4.336641000  | -8.399358000 | 14.177796000 |
| H  | 8.091176000  | -2.318871000 | 4.528149000  | H  | 3.283101000  | -8.118983000 | 14.277431000 |
| H  | 6.397414000  | -2.783338000 | 4.702245000  | H  | 4.379506000  | -9.469468000 | 13.941259000 |
| H  | 7.558211000  | -3.204702000 | 5.962258000  | H  | 4.806692000  | -8.250781000 | 15.154081000 |
| C  | 5.274163000  | -1.129000000 | 7.123771000  | C  | 4.262253000  | -7.891883000 | 11.195781000 |
| H  | 5.444268000  | -1.920460000 | 7.860066000  | H  | 4.715089000  | -7.430331000 | 10.312145000 |

|                          |              |              |              |   |              |              |              |
|--------------------------|--------------|--------------|--------------|---|--------------|--------------|--------------|
| H                        | 4.360645000  | -8.979172000 | 11.084679000 | N | 7.363946000  | -0.048671000 | 11.903779000 |
| H                        | 3.193948000  | -7.657516000 | 11.190642000 | N | 7.072589000  | -1.798992000 | 13.561864000 |
| C                        | 6.930643000  | -8.055647000 | 12.522308000 | N | 9.439737000  | 1.921864000  | 10.382538000 |
| H                        | 7.684954000  | -7.523428000 | 13.106859000 | N | 8.075343000  | -0.067574000 | 7.060924000  |
| H                        | 6.979480000  | -9.120370000 | 12.778476000 | N | 5.623533000  | 1.895270000  | 9.145058000  |
| H                        | 7.211984000  | -7.963008000 | 11.466789000 | C | 7.273089000  | -1.368949000 | 12.269280000 |
| C                        | 3.978015000  | -5.245967000 | 16.544817000 | C | 6.911126000  | -0.854005000 | 14.486585000 |
| H                        | 4.325931000  | -6.178157000 | 17.003781000 | H | 6.704686000  | -1.218838000 | 15.488500000 |
| H                        | 2.915679000  | -5.130828000 | 16.790642000 | C | 6.996340000  | 0.508567000  | 14.200285000 |
| H                        | 4.070938000  | -5.368588000 | 15.462571000 | H | 6.879374000  | 1.259193000  | 14.971560000 |
| C                        | 3.936605000  | -2.192465000 | 17.161068000 | C | 7.247784000  | 0.853531000  | 12.868722000 |
| H                        | 3.792773000  | -1.821468000 | 16.142664000 | H | 7.360514000  | 1.890199000  | 12.562925000 |
| H                        | 2.945401000  | -2.361070000 | 17.599145000 | C | 10.876827000 | -0.715015000 | 10.125165000 |
| H                        | 4.419996000  | -1.395091000 | 17.735597000 | H | 9.989919000  | -1.315231000 | 10.347162000 |
| C                        | 5.044286000  | -4.188318000 | 19.117947000 | H | 11.738717000 | -1.266012000 | 10.519033000 |
| H                        | 5.458524000  | -3.379310000 | 19.726847000 | H | 10.994820000 | -0.651974000 | 9.040858000  |
| H                        | 4.015422000  | -4.360371000 | 19.458481000 | C | 12.521748000 | 1.787184000  | 10.442231000 |
| H                        | 5.617029000  | -5.098194000 | 19.321940000 | H | 12.604048000 | 1.913732000  | 9.358385000  |
| C                        | 8.397415000  | -4.039985000 | 18.870596000 | H | 13.334498000 | 1.125061000  | 10.764787000 |
| H                        | 8.414920000  | -5.098552000 | 18.600387000 | H | 12.688674000 | 2.762543000  | 10.908496000 |
| H                        | 9.411462000  | -3.757085000 | 19.177388000 | C | 10.919174000 | 0.699005000  | 12.803457000 |
| H                        | 7.745989000  | -3.927301000 | 19.741388000 | H | 10.986660000 | 1.624095000  | 13.381498000 |
| C                        | 7.370953000  | -1.271897000 | 18.258174000 | H | 11.801833000 | 0.092596000  | 13.038688000 |
| H                        | 6.554063000  | -1.375577000 | 18.979434000 | H | 10.039592000 | 0.147362000  | 13.146973000 |
| H                        | 8.247385000  | -0.908013000 | 18.808846000 | C | 10.346978000 | 4.658101000  | 9.380271000  |
| H                        | 7.089041000  | -0.490002000 | 17.545667000 | H | 11.403069000 | 4.378390000  | 9.310496000  |
| C                        | 9.373822000  | -2.559210000 | 16.383176000 | H | 10.296269000 | 5.730090000  | 9.606300000  |
| H                        | 9.199991000  | -1.768432000 | 15.647080000 | H | 9.902743000  | 4.499292000  | 8.393522000  |
| H                        | 10.177925000 | -2.220558000 | 17.047710000 | C | 10.348654000 | 4.142841000  | 12.365622000 |
| H                        | 9.722266000  | -3.449316000 | 15.851547000 | H | 9.867044000  | 3.686755000  | 13.236906000 |
| C                        | 9.806523000  | -8.496988000 | 14.888641000 | H | 10.262179000 | 5.231202000  | 12.476098000 |
| H                        | 10.810207000 | -8.420526000 | 14.458277000 | H | 11.413098000 | 3.893949000  | 12.398715000 |
| H                        | 9.863026000  | -9.209165000 | 15.721431000 | C | 7.717047000  | 4.341906000  | 10.976807000 |
| H                        | 9.145595000  | -8.921131000 | 14.128962000 | H | 7.694065000  | 5.410231000  | 10.731945000 |
| C                        | 7.494219000  | -7.155632000 | 16.358582000 | H | 7.406886000  | 4.243299000  | 12.023750000 |
| H                        | 6.781059000  | -7.559340000 | 15.633173000 | H | 6.967371000  | 3.831346000  | 10.367496000 |
| H                        | 7.600519000  | -7.899218000 | 17.157106000 | C | 10.665649000 | 1.494434000  | 6.985817000  |
| H                        | 7.067337000  | -6.248307000 | 16.799686000 | H | 10.327619000 | 2.435373000  | 6.537275000  |
| C                        | 10.409351000 | -6.402125000 | 16.959994000 | H | 11.725812000 | 1.369295000  | 6.735187000  |
| H                        | 10.179411000 | -7.009047000 | 17.844057000 | H | 10.578673000 | 1.607238000  | 8.069691000  |
| H                        | 11.438335000 | -6.626839000 | 16.665496000 | C | 10.649548000 | -1.563033000 | 6.377084000  |
| H                        | 10.367090000 | -5.351739000 | 17.256283000 | H | 10.717059000 | -1.955774000 | 7.395295000  |
| C                        | 10.401287000 | -6.299835000 | 11.745553000 | H | 11.670546000 | -1.413241000 | 6.006223000  |
| H                        | 9.561919000  | -6.062320000 | 11.086148000 | H | 10.183152000 | -2.336269000 | 5.757130000  |
| H                        | 11.324555000 | -6.138558000 | 11.176323000 | C | 9.610539000  | 0.458681000  | 4.399279000  |
| H                        | 10.339435000 | -7.363541000 | 11.996566000 | H | 9.183322000  | -0.340589000 | 3.786423000  |
| C                        | 10.491686000 | -3.405919000 | 12.808377000 | H | 10.645527000 | 0.608676000  | 4.067039000  |
| H                        | 10.758942000 | -2.777420000 | 13.663026000 | H | 9.058799000  | 1.380775000  | 4.191612000  |
| H                        | 11.275538000 | -3.290265000 | 12.051350000 | C | 6.234985000  | 0.362930000  | 4.620009000  |
| H                        | 9.568304000  | -3.012403000 | 12.377546000 | H | 6.212734000  | 1.419144000  | 4.898777000  |
| C                        | 12.089388000 | -5.545301000 | 14.143860000 | H | 5.226774000  | 0.082015000  | 4.292830000  |
| H                        | 12.268280000 | -6.595546000 | 14.392473000 | H | 6.902562000  | 0.257423000  | 3.760574000  |
| H                        | 12.869007000 | -5.239275000 | 13.435262000 | C | 7.221267000  | -2.419516000 | 5.235002000  |
| H                        | 12.218233000 | -4.951604000 | 15.053916000 | H | 8.041455000  | -2.325370000 | 4.516111000  |
| <b>Complex 2 (s=7/2)</b> |              |              |              | H | 6.342528000  | -2.774102000 | 4.681942000  |
| U                        | 7.674462000  | 0.689372000  | 9.339883000  | H | 7.492663000  | -3.204528000 | 5.948389000  |
| Si                       | 10.846564000 | 1.005817000  | 10.925738000 | C | 5.230300000  | -1.108496000 | 7.106381000  |
| Si                       | 9.472097000  | 3.645923000  | 10.738535000 | H | 5.392127000  | -1.908578000 | 7.835501000  |
| Si                       | 9.645393000  | 0.058750000  | 6.269575000  | H | 4.418967000  | -1.428441000 | 6.441402000  |
| Si                       | 6.784016000  | -0.750562000 | 6.071128000  | H | 4.897676000  | -0.216981000 | 7.646147000  |
| Si                       | 5.456251000  | 3.161460000  | 7.931339000  | C | 4.850482000  | 4.848548000  | 8.593390000  |
| Si                       | 4.214977000  | 1.583010000  | 10.159836000 | H | 3.842909000  | 4.783585000  | 9.016670000  |
|                          |              |              |              | H | 4.808529000  | 5.562377000  | 7.761197000  |



|   |              |              |              |    |              |              |              |
|---|--------------|--------------|--------------|----|--------------|--------------|--------------|
| C | 7.706979000  | 4.327591000  | 7.763490000  | C  | 5.668724000  | 0.214244000  | 2.227943000  |
| C | 7.472649000  | 6.027792000  | 9.335107000  | H  | 5.904707000  | -0.308083000 | 3.160831000  |
| H | 7.379653000  | 6.321421000  | 10.380183000 | H  | 5.920635000  | -0.458630000 | 1.397827000  |
| C | 7.508020000  | 7.002147000  | 8.323577000  | H  | 4.588894000  | 0.385299000  | 2.200115000  |
| H | 7.427766000  | 8.058812000  | 8.544039000  | C  | 4.680951000  | 4.702260000  | 5.020130000  |
| C | 7.645869000  | 6.530746000  | 7.011359000  | H  | 5.411697000  | 4.808337000  | 5.827473000  |
| H | 7.651786000  | 7.219923000  | 6.170160000  | H  | 3.686395000  | 4.690890000  | 5.482297000  |
| C | 10.388200000 | 8.527498000  | 2.441661000  | H  | 4.739062000  | 5.585632000  | 4.379046000  |
| H | 10.527060000 | 7.745142000  | 1.690788000  | C  | 3.483754000  | 3.188753000  | 2.719634000  |
| H | 11.381191000 | 8.879699000  | 2.747640000  | H  | 3.622826000  | 4.042810000  | 2.048676000  |
| H | 9.873078000  | 9.364968000  | 1.961896000  | H  | 2.524428000  | 3.320389000  | 3.235892000  |
| C | 8.873996000  | 9.512660000  | 4.846877000  | H  | 3.405102000  | 2.286751000  | 2.104421000  |
| H | 8.192267000  | 10.110373000 | 4.232252000  | C  | 4.471150000  | 1.679097000  | 5.196654000  |
| H | 9.761681000  | 10.127376000 | 5.044611000  | H  | 4.430642000  | 0.708805000  | 4.694278000  |
| H | 8.384525000  | 9.326693000  | 5.807997000  | H  | 3.493390000  | 1.860994000  | 5.659004000  |
| C | 10.696842000 | 7.108735000  | 5.131819000  | H  | 5.213339000  | 1.616164000  | 5.997092000  |
| H | 10.261305000 | 6.862099000  | 6.104560000  | N  | 7.714610000  | 2.070465000  | 8.566448000  |
| H | 11.522915000 | 7.811103000  | 5.300085000  | N  | 7.976146000  | 2.600529000  | 6.154465000  |
| H | 11.105087000 | 6.188858000  | 4.703817000  | C  | 7.795525000  | 2.999153000  | 7.496167000  |
| C | 5.478132000  | 8.303694000  | 3.914307000  | C  | 8.097103000  | 1.308671000  | 5.927694000  |
| H | 5.183191000  | 7.645985000  | 4.736341000  | H  | 8.209551000  | 1.020803000  | 4.883178000  |
| H | 4.571536000  | 8.597725000  | 3.370618000  | C  | 8.088659000  | 0.333711000  | 6.940471000  |
| H | 5.908915000  | 9.207910000  | 4.358083000  | H  | 8.208212000  | -0.719638000 | 6.721419000  |
| C | 5.858182000  | 6.186673000  | 1.661902000  | C  | 7.895072000  | 0.797131000  | 8.246692000  |
| H | 6.398999000  | 6.079210000  | 0.714508000  | H  | 7.877797000  | 0.107471000  | 9.087407000  |
| H | 4.836450000  | 6.510636000  | 1.428619000  | U  | 7.253947000  | 2.933226000  | 10.940903000 |
| H | 5.812907000  | 5.193737000  | 2.117940000  | Si | 5.985221000  | -0.555348000 | 11.178417000 |
| C | 7.147257000  | 8.863507000  | 1.474603000  | Si | 8.641233000  | -0.244206000 | 12.470845000 |
| H | 7.528499000  | 9.781909000  | 1.932327000  | Si | 4.421248000  | 3.194374000  | 13.242097000 |
| H | 6.220367000  | 9.120300000  | 0.945115000  | Si | 3.913695000  | 4.375048000  | 10.530676000 |
| H | 7.874298000  | 8.528660000  | 0.727632000  | Si | 8.792186000  | 5.432008000  | 13.289349000 |
| C | 12.401666000 | 5.463880000  | 1.879166000  | Si | 10.607344000 | 4.139728000  | 11.314109000 |
| H | 12.196389000 | 6.325716000  | 2.518333000  | N  | 7.311643000  | 0.502984000  | 11.617084000 |
| H | 12.463808000 | 5.822474000  | 0.843740000  | N  | 5.016495000  | 3.562896000  | 11.636086000 |
| H | 13.383849000 | 5.067435000  | 2.152343000  | N  | 8.998179000  | 4.250338000  | 12.017274000 |
| C | 9.604353000  | 4.727899000  | 0.915627000  | C  | 4.957959000  | -1.199500000 | 12.665425000 |
| H | 8.849141000  | 3.948034000  | 0.780956000  | H  | 4.794868000  | -0.422176000 | 13.416584000 |
| H | 9.979221000  | 5.001848000  | -0.078355000 | H  | 3.975350000  | -1.545892000 | 12.321192000 |
| H | 9.116308000  | 5.606829000  | 1.350876000  | H  | 5.452483000  | -2.042051000 | 13.157557000 |
| C | 11.802019000 | 2.618723000  | 1.110222000  | C  | 6.491761000  | -2.167341000 | 10.265649000 |
| H | 12.677726000 | 2.229117000  | 1.640120000  | H  | 7.140759000  | -2.805286000 | 10.875449000 |
| H | 12.130813000 | 2.921392000  | 0.107648000  | H  | 5.588795000  | -2.746089000 | 10.031924000 |
| H | 11.085470000 | 1.800518000  | 0.999209000  | H  | 7.006760000  | -1.968648000 | 9.320652000  |
| C | 13.425724000 | 3.521585000  | 4.474780000  | C  | 4.754475000  | 0.307237000  | 10.018006000 |
| H | 13.826992000 | 3.148634000  | 3.526898000  | H  | 5.212358000  | 0.562901000  | 9.057884000  |
| H | 14.015988000 | 3.068780000  | 5.281652000  | H  | 3.906365000  | -0.359709000 | 9.819508000  |
| H | 13.588161000 | 4.603348000  | 4.514110000  | H  | 4.369615000  | 1.228272000  | 10.466178000 |
| C | 11.551940000 | 1.163470000  | 4.729510000  | C  | 9.919749000  | -1.074535000 | 11.314072000 |
| H | 10.626678000 | 0.769783000  | 5.159110000  | H  | 10.277963000 | -0.398315000 | 10.533011000 |
| H | 12.385848000 | 0.759610000  | 5.316880000  | H  | 10.789618000 | -1.430182000 | 11.880636000 |
| H | 11.641600000 | 0.784857000  | 3.705844000  | H  | 9.470588000  | -1.939864000 | 10.814218000 |
| C | 11.280619000 | 3.637636000  | 6.549827000  | C  | 9.540573000  | 1.000477000  | 13.596117000 |
| H | 11.572454000 | 4.684505000  | 6.677726000  | H  | 8.971334000  | 1.123183000  | 14.524729000 |
| H | 11.896028000 | 3.034438000  | 7.227652000  | H  | 10.539174000 | 0.632278000  | 13.861572000 |
| H | 10.243746000 | 3.535739000  | 6.882779000  | H  | 9.643701000  | 1.994174000  | 13.151583000 |
| C | 6.293554000  | 2.459580000  | 0.301114000  | C  | 8.175497000  | -1.649121000 | 13.695148000 |
| H | 5.236328000  | 2.739203000  | 0.243244000  | H  | 7.770627000  | -2.539362000 | 13.202969000 |
| H | 6.482501000  | 1.690130000  | -0.458222000 | H  | 9.082311000  | -1.954419000 | 14.233441000 |
| H | 6.880277000  | 3.345244000  | 0.040493000  | H  | 7.445868000  | -1.310687000 | 14.438049000 |
| C | 8.497897000  | 1.126487000  | 2.006882000  | C  | 3.006366000  | 1.905800000  | 13.315822000 |
| H | 9.237123000  | 1.851228000  | 2.358900000  | H  | 3.169904000  | 1.073831000  | 12.626526000 |
| H | 8.769982000  | 0.814362000  | 0.991231000  | H  | 2.938915000  | 1.491779000  | 14.329995000 |
| H | 8.576116000  | 0.244716000  | 2.653314000  | H  | 2.038827000  | 2.356255000  | 13.076460000 |

|   |              |             |              |   |              |              |              |
|---|--------------|-------------|--------------|---|--------------|--------------|--------------|
| C | 5.822529000  | 2.496534000 | 14.321313000 | C | 7.613494807  | 6.520424164  | 7.010719586  |
| H | 6.610012000  | 3.237991000 | 14.485698000 | H | 7.627615902  | 7.208428144  | 6.168636654  |
| H | 5.430797000  | 2.206058000 | 15.304193000 | C | 10.443927384 | 8.516896681  | 2.515050874  |
| H | 6.275327000  | 1.614105000 | 13.856832000 | H | 10.600220943 | 7.737290003  | 1.764778079  |
| C | 3.711092000  | 4.692247000 | 14.205042000 | H | 11.429468151 | 8.872008482  | 2.841452164  |
| H | 2.853792000  | 5.137752000 | 13.689528000 | H | 9.935202306  | 9.353800025  | 2.027679157  |
| H | 3.366079000  | 4.359710000 | 15.192585000 | C | 8.928639444  | 9.490797665  | 4.921910402  |
| H | 4.458250000  | 5.476491000 | 14.353679000 | H | 8.260542054  | 10.109993256 | 4.313431709  |
| C | 2.055474000  | 3.985530000 | 10.809474000 | H | 9.826201318  | 10.086518953 | 5.132843099  |
| H | 1.665852000  | 4.343529000 | 11.767839000 | H | 8.431437201  | 9.299183112  | 5.877892915  |
| H | 1.483897000  | 4.483178000 | 10.015768000 | C | 10.699693036 | 7.040877397  | 5.178009965  |
| H | 1.855639000  | 2.911750000 | 10.738005000 | H | 10.255476782 | 6.791773028  | 6.146239757  |
| C | 4.025595000  | 6.276583000 | 10.640287000 | H | 11.542872423 | 7.718938136  | 5.358982763  |
| H | 4.974137000  | 6.643830000 | 10.238776000 | H | 11.088620851 | 6.118138857  | 4.737118532  |
| H | 3.219408000  | 6.740253000 | 10.058403000 | C | 5.501501838  | 8.336375800  | 3.934969432  |
| H | 3.939335000  | 6.619581000 | 11.676741000 | H | 5.169982875  | 7.663840730  | 4.730843019  |
| C | 4.190475000  | 3.866641000 | 8.727343000  | H | 4.615547467  | 8.667459779  | 3.378622636  |
| H | 3.875526000  | 2.831882000 | 8.561348000  | H | 5.942014381  | 9.216848953  | 4.415721671  |
| H | 3.584759000  | 4.509040000 | 8.077209000  | C | 5.885001882  | 6.248956765  | 1.662787631  |
| H | 5.228005000  | 3.958401000 | 8.395204000  | H | 6.441046519  | 6.134814291  | 0.725086604  |
| C | 9.163562000  | 4.728319000 | 15.028200000 | H | 4.874587668  | 6.594951901  | 1.412720160  |
| H | 10.212412000 | 4.421095000 | 15.098522000 | H | 5.810148702  | 5.254723732  | 2.111781297  |
| H | 8.978863000  | 5.482600000 | 15.803537000 | C | 7.205304410  | 8.917389136  | 1.526219154  |
| H | 8.550980000  | 3.850890000 | 15.254754000 | H | 7.597631660  | 9.820888908  | 2.004124420  |
| C | 7.034669000  | 6.166109000 | 13.305309000 | H | 6.286685515  | 9.198847402  | 0.994980231  |
| H | 6.274726000  | 5.457374000 | 12.965370000 | H | 7.933028434  | 8.585392326  | 0.778582191  |
| H | 6.766269000  | 6.511017000 | 14.311304000 | C | 12.436563365 | 5.432392877  | 1.908180880  |
| H | 6.987268000  | 7.034298000 | 12.637852000 | H | 12.249020302 | 6.279474417  | 2.572376117  |
| C | 9.890992000  | 7.001063000 | 13.175355000 | H | 12.504875386 | 5.819568586  | 0.883486289  |
| H | 9.693320000  | 7.554860000 | 12.251707000 | H | 13.410905683 | 5.008969055  | 2.168383684  |
| H | 9.638749000  | 7.659557000 | 14.016976000 | C | 9.630602061  | 4.775902990  | 0.917589646  |
| H | 10.964867000 | 6.798739000 | 13.224063000 | H | 8.857389432  | 4.017104091  | 0.765708896  |
| C | 10.777602000 | 2.590989000 | 10.233424000 | H | 10.015068383 | 5.059510774  | -0.070146149 |
| H | 10.117428000 | 2.610061000 | 9.361958000  | H | 9.161398586  | 5.656450229  | 1.369378426  |
| H | 11.808479000 | 2.529280000 | 9.863593000  | C | 11.781011710 | 2.619265454  | 1.064282871  |
| H | 10.576080000 | 1.679469000 | 10.802109000 | H | 12.644770271 | 2.195133064  | 1.586970819  |
| C | 11.999506000 | 3.966539000 | 12.623312000 | H | 12.121441489 | 2.942144011  | 0.071989802  |
| H | 11.830975000 | 3.091075000 | 13.259048000 | H | 11.046400974 | 1.821207953  | 0.927258772  |
| H | 12.963634000 | 3.833132000 | 12.116475000 | C | 13.427057231 | 3.403447399  | 4.447678685  |
| H | 12.089084000 | 4.841819000 | 13.274983000 | H | 13.820488874 | 3.039322121  | 3.493176810  |
| C | 11.102546000 | 5.602832000 | 10.199414000 | H | 14.007151915 | 2.923917030  | 5.246393424  |
| H | 11.212435000 | 6.539763000 | 10.752115000 | H | 13.611828993 | 4.480724217  | 4.506175526  |
| H | 12.060806000 | 5.385280000 | 9.712099000  | C | 11.495072900 | 1.084727634  | 4.660406352  |
| H | 10.357194000 | 5.756689000 | 9.413976000  | H | 10.557053309 | 0.708051859  | 5.077637741  |

**Complex 3 (s=3)**

|    |              |             |              |   |              |              |              |
|----|--------------|-------------|--------------|---|--------------|--------------|--------------|
| U  | 8.217622604  | 4.370762243 | 4.311009664  | C | 11.289516644 | 3.527264291  | 6.528237996  |
| Si | 9.445036533  | 7.874453804 | 4.022146092  | H | 11.596661173 | 4.567116107  | 6.676345182  |
| Si | 6.777432854  | 7.515952093 | 2.768453221  | H | 11.896408863 | 2.901241256  | 7.192937009  |
| Si | 11.046276088 | 4.119405166 | 2.004356199  | H | 10.251205263 | 3.434745587  | 6.858389565  |
| Si | 11.575613148 | 2.989235495 | 4.734630340  | C | 6.316006697  | 2.519583278  | 0.243088682  |
| Si | 6.704385227  | 1.831586178 | 1.984622650  | H | 5.263150880  | 2.813741268  | 0.176339851  |
| Si | 4.885902007  | 3.113327559 | 3.964806562  | H | 6.505582330  | 1.762345980  | -0.528206738 |
| N  | 7.771028757  | 5.245897056 | 6.692538535  | H | 6.916825550  | 3.402682208  | 0.007402131  |
| N  | 7.519643634  | 4.723879046 | 9.107362181  | C | 8.470883661  | 1.118648954  | 1.965541048  |
| N  | 8.127443922  | 6.794042140 | 3.612032137  | H | 9.222059233  | 1.837120842  | 2.304700272  |
| N  | 10.459062382 | 3.764945840 | 3.616622220  | H | 8.742612474  | 0.777480444  | 0.959187740  |
| N  | 6.490908774  | 3.018676271 | 3.250137870  | H | 8.529764684  | 0.251004115  | 2.632833030  |
| C  | 7.691437853  | 4.319190216 | 7.764980790  | C | 5.623894186  | 0.251465029  | 2.114258905  |
| C  | 7.425832679  | 6.019040892 | 9.332884295  | H | 5.831178735  | -0.292738737 | 3.041444651  |
| H  | 7.326628878  | 6.312062210 | 10.377555857 | H | 5.880147739  | -0.410451041 | 1.276590900  |
| C  | 7.444380871  | 6.991170720 | 8.320123708  | H | 4.547772033  | 0.442118066  | 2.068018339  |
| H  | 7.345091873  | 8.046784609 | 8.537853158  | C | 4.713391811  | 4.660603735  | 5.047049709  |



|   |              |              |              |    |              |              |              |
|---|--------------|--------------|--------------|----|--------------|--------------|--------------|
| H | 11.265751823 | -0.502070674 | 8.999467173  | H  | 3.263569447  | -0.614850516 | 10.957275883 |
| C | 12.407263350 | 1.832146047  | 10.647430433 | H  | 4.692817400  | -0.267338759 | 11.927669480 |
| H | 12.537758989 | 2.090428995  | 9.592987084  | C  | 2.705026036  | 1.599783259  | 9.157048220  |
| H | 13.209036734 | 1.134665032  | 10.917935259 | H  | 2.490943146  | 2.608748056  | 8.797275955  |
| H | 12.551357257 | 2.737182550  | 11.242521471 | H  | 1.879920169  | 1.310547675  | 9.818752090  |
| C | 10.683504446 | 0.516509804  | 12.810682155 | H  | 2.696077120  | 0.920985905  | 8.299914429  |
| H | 10.548548372 | 1.388166335  | 13.454024104 | N  | 7.266757764  | -3.653827614 | 11.654122943 |
| H | 11.629703001 | 0.040347119  | 13.092043582 | N  | 7.643134554  | -1.930744469 | 9.984598357  |
| H | 9.882071852  | -0.194983295 | 13.023321978 | C  | 7.387730859  | -2.337643673 | 11.276554447 |
| C | 10.481282006 | 4.582605125  | 9.586908425  | C  | 7.830911513  | -2.895187468 | 9.082853865  |
| H | 11.535815844 | 4.307184242  | 9.656887882  | H  | 8.081963254  | -2.556133021 | 8.083834425  |
| H | 10.399994559 | 5.650926147  | 9.818728277  | C  | 7.709944769  | -4.250900421 | 9.384143049  |
| H | 10.167103123 | 4.444973531  | 8.548213391  | H  | 7.842369259  | -5.013277087 | 8.627512189  |
| C | 10.042639046 | 3.934519631  | 12.552221403 | C  | 7.398754679  | -4.574473787 | 10.705741532 |
| H | 9.388298149  | 3.509579188  | 13.320664558 | H  | 7.252168348  | -5.605165545 | 11.014557203 |
| H | 10.046223693 | 5.021397841  | 12.697464154 | U  | 6.948269791  | -4.337635747 | 14.161063118 |
| H | 11.059669564 | 3.582361168  | 12.738530954 | Si | 3.873570054  | -4.588657854 | 12.733204785 |
| C | 7.673944840  | 4.413787528  | 10.765448601 | Si | 5.118109746  | -7.310756736 | 12.790911564 |
| H | 7.499755036  | 4.905078861  | 9.805758672  | Si | 5.082427324  | -3.874823675 | 17.263878571 |
| H | 7.631845086  | 5.188846457  | 11.538539519 | Si | 7.925914704  | -2.897757153 | 17.263380086 |
| H | 6.847586411  | 3.719420192  | 10.935481189 | Si | 9.089353220  | -6.772870817 | 15.370202969 |
| C | 10.640091273 | 1.524481336  | 7.081613462  | Si | 10.353748701 | -5.154810834 | 13.166864482 |
| H | 10.306357704 | 2.444691467  | 6.591098961  | N  | 5.299359304  | -5.567524109 | 13.211479945 |
| H | 11.700197348 | 1.390151279  | 6.838038466  | N  | 6.603172669  | -3.664546628 | 16.303440386 |
| H | 10.558400065 | 1.681917918  | 8.158952723  | N  | 8.889343800  | -5.440805208 | 14.173445866 |
| C | 10.653802785 | -1.554523787 | 6.485724954  | C  | 4.016025628  | -2.901019530 | 13.606975908 |
| H | 10.711833420 | -1.978699040 | 7.490860096  | H  | 4.470866703  | -2.148851222 | 12.962021027 |
| H | 11.678466155 | -1.375615309 | 6.140499771  | H  | 2.997343548  | -2.565226932 | 13.831287265 |
| H | 10.219056158 | -2.312283382 | 5.826938967  | H  | 4.538868625  | -2.895195406 | 14.570512956 |
| C | 9.519706089  | 0.455785127  | 4.534085392  | C  | 2.203097711  | -5.325512831 | 13.245508688 |
| H | 9.119551778  | -0.361146010 | 3.928812984  | H  | 2.134209946  | -5.513866594 | 14.319759142 |
| H | 10.541011829 | 0.646442398  | 4.181931162  | H  | 1.424286916  | -4.598847691 | 12.984814279 |
| H | 8.933417385  | 1.356422580  | 4.333318719  | H  | 1.964006963  | -6.254057504 | 12.720988728 |
| C | 6.248340803  | 0.204473031  | 4.765013581  | C  | 3.751587290  | -4.186093141 | 10.883213294 |
| H | 6.353905314  | 1.274692741  | 4.948821711  | H  | 3.525413229  | -5.058791623 | 10.267698130 |
| H | 5.194035040  | 0.007389960  | 4.542218846  | H  | 2.937315269  | -3.465483906 | 10.743780380 |
| H | 6.820832268  | -0.039813709 | 3.867122559  | H  | 4.666487657  | -3.724830501 | 10.502497780 |
| C | 7.325781666  | -2.521189860 | 5.441168223  | C  | 4.108109349  | -8.263455704 | 14.079929133 |
| H | 8.122773404  | -2.394715968 | 4.703437458  | H  | 3.073241854  | -7.917378017 | 14.137741747 |
| H | 6.451675044  | -2.907704097 | 4.902810807  | H  | 4.089561157  | -9.323977183 | 13.803460479 |
| H | 7.638676235  | -3.300115486 | 6.141770326  | H  | 4.541314483  | -8.191157392 | 15.081503441 |
| C | 5.273519579  | -1.257848500 | 7.292499062  | C  | 4.290260625  | -7.576015299 | 11.099143012 |
| H | 5.449116995  | -2.051315388 | 8.024819520  | H  | 4.844379056  | -7.098300537 | 10.284919146 |
| H | 4.478853575  | -1.608664440 | 6.624133380  | H  | 4.289569519  | -8.654788101 | 10.903648002 |
| H | 4.896852272  | -0.374949069 | 7.815020849  | H  | 3.251664018  | -7.240810616 | 11.048201235 |
| C | 4.875479861  | 4.681061727  | 8.630473465  | C  | 6.792999132  | -8.178100472 | 12.651379165 |
| H | 3.812866015  | 4.567936332  | 8.866571715  | H  | 7.199023606  | -8.414073837 | 13.635300121 |
| H | 4.943506655  | 5.433365505  | 7.835194673  | H  | 6.640411931  | -9.128486936 | 12.127542902 |
| H | 5.380276327  | 5.078205019  | 9.511566814  | H  | 7.550393595  | -7.613647210 | 12.100451144 |
| C | 7.320589908  | 3.392124593  | 7.214805788  | C  | 4.075363860  | -5.333636761 | 16.598215926 |
| H | 8.099044037  | 3.580152912  | 7.960934596  | H  | 4.459086159  | -6.268389741 | 17.018847809 |
| H | 7.265736452  | 4.287922719  | 6.585715641  | H  | 3.035185013  | -5.227788081 | 16.926217977 |
| H | 7.642730262  | 2.563121865  | 6.578592915  | H  | 4.080496351  | -5.436334718 | 15.511840964 |
| C | 4.444569769  | 2.601398314  | 6.517728535  | C  | 4.027066911  | -2.293890768 | 17.263404958 |
| H | 4.783514147  | 3.105692061  | 5.605686255  | H  | 3.700128507  | -1.969145803 | 16.273126996 |
| H | 3.424571625  | 2.941157625  | 6.713636832  | H  | 3.126256418  | -2.478307981 | 17.860326420 |
| H | 4.407649601  | 1.531398741  | 6.309393040  | H  | 4.560962305  | -1.462481342 | 17.732765069 |
| C | 4.139667892  | 2.705269987  | 11.603806654 | C  | 5.348864894  | -4.295612723 | 19.095433527 |
| H | 4.967848808  | 2.639466267  | 12.315103957 | H  | 5.761889854  | -3.476277534 | 19.688826436 |
| H | 3.218515296  | 2.483408721  | 12.155368630 | H  | 4.358552007  | -4.523927306 | 19.508258458 |
| H | 4.075925847  | 3.740025296  | 11.256964834 | H  | 5.974367749  | -5.179987500 | 19.243419003 |
| C | 4.301712549  | -0.269983057 | 10.908417477 | C  | 8.576219567  | -3.969172274 | 18.691292396 |
| H | 4.853733322  | -1.007730756 | 10.319301908 | H  | 8.476435788  | -5.040772608 | 18.511582743 |



|   |              |              |              |   |              |              |              |
|---|--------------|--------------|--------------|---|--------------|--------------|--------------|
| H | 9.639409687  | -3.756697555 | 18.848877676 | C | 10.656559798 | 0.469100814  | 12.807681191 |
| H | 8.056586559  | -3.735508239 | 19.623399490 | H | 10.499837077 | 1.333044587  | 13.456298508 |
| C | 7.429384517  | -1.252195829 | 18.084783300 | H | 11.606913983 | 0.005733635  | 13.096333622 |
| H | 6.661444609  | -1.384123950 | 18.851925208 | H | 9.864542327  | -0.257281745 | 13.004726690 |
| H | 8.322433567  | -0.864606303 | 18.590056554 | C | 10.490032481 | 4.560794026  | 9.620441858  |
| H | 7.087567235  | -0.472771717 | 17.398482742 | H | 11.543205275 | 4.280943401  | 9.692727470  |
| C | 9.394077293  | -2.500495854 | 16.126021542 | H | 10.411693610 | 5.627677803  | 9.859814657  |
| H | 9.176304980  | -1.724866473 | 15.386269849 | H | 10.179548843 | 4.431933545  | 8.579535392  |
| H | 10.208948872 | -2.122757492 | 16.754198858 | C | 10.038000808 | 3.890473563  | 12.578850661 |
| H | 9.767209168  | -3.387774756 | 15.607333644 | H | 9.377137271  | 3.464854714  | 13.341298766 |
| C | 9.771945833  | -8.386624355 | 14.637857640 | H | 10.048520322 | 4.976264843  | 12.731884488 |
| H | 10.836590661 | -8.287606825 | 14.404297324 | H | 11.051630832 | 3.529765183  | 12.767107584 |
| H | 9.689371957  | -9.163422689 | 15.407750211 | C | 7.677733220  | 4.397369275  | 10.788061403 |
| H | 9.260692347  | -8.745338266 | 13.743904755 | H | 7.517423735  | 4.911069677  | 9.837623080  |
| C | 7.377942138  | -7.080404821 | 16.145802187 | H | 7.630021541  | 5.154892857  | 11.577999208 |
| H | 6.539085600  | -7.066994940 | 15.439935301 | H | 6.846047034  | 3.703418402  | 10.931580094 |
| H | 7.374562283  | -8.077643051 | 16.600650142 | C | 10.634049657 | 1.520727882  | 7.086123640  |
| H | 7.169842655  | -6.354544560 | 16.935666966 | H | 10.299077283 | 2.448843921  | 6.611747986  |
| C | 10.280061299 | -6.372465147 | 16.794039026 | H | 11.691673890 | 1.386652359  | 6.831839154  |
| H | 9.960638798  | -6.913729863 | 17.692035354 | H | 10.561592062 | 1.662472241  | 8.166221502  |
| H | 11.295957260 | -6.701791729 | 16.563092316 | C | 10.630585133 | -1.552168419 | 6.467358270  |
| H | 10.319948563 | -5.311369511 | 17.044593870 | H | 10.685086686 | -1.983719874 | 7.469548541  |
| C | 10.452845079 | -6.350115875 | 11.698939494 | H | 11.656605843 | -1.375652352 | 6.124966831  |
| H | 9.605211078  | -6.249753177 | 11.015564228 | H | 10.193176215 | -2.303154016 | 5.802694182  |
| H | 11.361994347 | -6.138849267 | 11.123988413 | C | 9.506061783  | 0.478303207  | 4.530034540  |
| H | 10.502265471 | -7.392144197 | 12.025262994 | H | 9.101388828  | -0.332426502 | 3.919419559  |
| C | 10.388693979 | -3.385270689 | 12.478508600 | H | 10.527986661 | 0.666375447  | 4.178320057  |
| H | 9.943974478  | -2.645722729 | 13.149813333 | H | 8.923921300  | 1.383096817  | 4.335885229  |
| H | 11.438388492 | -3.102344486 | 12.346230692 | C | 6.233269834  | 0.230682121  | 4.757435234  |
| H | 9.907354354  | -3.309856052 | 11.501785514 | H | 6.345815252  | 1.299528617  | 4.944901037  |
| C | 11.977030605 | -5.334446931 | 14.133303538 | H | 5.177307747  | 0.040684205  | 4.536267719  |
| H | 12.180351617 | -6.355795006 | 14.463320696 | H | 6.802313710  | -0.013866561 | 3.857405277  |
| H | 12.792418132 | -5.045028252 | 13.459733926 | C | 7.302155489  | -2.501338834 | 5.422138480  |
| H | 12.021032222 | -4.677807287 | 15.006706883 | H | 8.097972983  | -2.374145261 | 4.683240879  |

#### Complex 4 (s=3/2)

|    |              |              |              |   |             |              |              |
|----|--------------|--------------|--------------|---|-------------|--------------|--------------|
| U  | 7.696128480  | 0.635121709  | 9.355361098  | H | 7.614543636 | -3.283242141 | 6.119588274  |
| Si | 10.739669731 | 0.921410834  | 10.967822386 | C | 5.254866081 | -1.238191682 | 7.279197134  |
| Si | 9.391259954  | 3.586280255  | 10.816122614 | H | 5.431112797 | -2.027191785 | 8.016218802  |
| Si | 9.639845200  | 0.067943713  | 6.377485981  | H | 4.462475539 | -1.594932820 | 6.611268552  |
| Si | 6.781096348  | -0.850477270 | 6.218553944  | H | 4.874585022 | -0.353304661 | 7.795701646  |
| Si | 5.611938484  | 3.091342361  | 7.954921026  | C | 4.893039550 | 4.708109564  | 8.644751725  |
| Si | 4.296992818  | 1.491027280  | 10.146276823 | H | 3.828953533 | 4.598361907  | 8.875994245  |
| N  | 7.324184079  | -0.042413557 | 11.870576547 | H | 4.967452984 | 5.466394632  | 7.855736276  |
| N  | 6.981837092  | -1.768375955 | 13.544403874 | H | 5.396399828 | 5.095880598  | 9.530865908  |
| N  | 9.300706614  | 1.835849229  | 10.385342700 | C | 7.336747806 | 3.413076308  | 7.228398235  |
| N  | 8.060831090  | -0.094717965 | 7.243691986  | H | 8.113997528 | 3.580547149  | 7.980691958  |
| N  | 5.787812660  | 1.777260312  | 9.180628887  | H | 7.295597924 | 4.318563141  | 6.612339607  |
| C  | 7.223814501  | -1.358199028 | 12.252046667 | H | 7.651282296 | 2.589326193  | 6.581629863  |
| C  | 6.755243923  | -0.808970723 | 14.440620579 | C | 4.457058881 | 2.651981309  | 6.511951507  |
| H  | 6.513795161  | -1.149757697 | 15.441848806 | H | 4.806149704 | 3.158006524  | 5.604680289  |
| C  | 6.827958169  | 0.549230421  | 14.131644567 | H | 3.440031539 | 3.002313052  | 6.704885299  |
| H  | 6.659633236  | 1.310587892  | 14.882243865 | H | 4.408678322 | 1.583869311  | 6.296440369  |
| C  | 7.152716363  | 0.876535545  | 12.814600713 | C | 4.123213126 | 2.706480744  | 11.591684790 |
| H  | 7.276916380  | 1.910693414  | 12.506648129 | H | 4.944077108 | 2.631857756  | 12.310514403 |
| C  | 10.876576352 | -0.705638811 | 10.003831304 | H | 3.195760675 | 2.484699913  | 12.132644171 |
| H  | 9.960754159  | -1.301639505 | 9.944599965  | H | 4.067284911 | 3.743925862  | 11.251609561 |
| H  | 11.609763602 | -1.333045116 | 10.522114910 | C | 4.284606895 | -0.264435692 | 10.877185435 |
| H  | 11.251878912 | -0.530009645 | 8.994332566  | H | 4.846741832 | -0.998574932 | 10.293207649 |
| C  | 12.396714202 | 1.792975289  | 10.660400038 | H | 3.246520415 | -0.611619889 | 10.907718963 |
| H  | 12.532292588 | 2.058565117  | 9.608404134  | H | 4.660754021 | -0.266908008 | 11.902111277 |
| H  | 13.194122931 | 1.089497637  | 10.928319833 | C | 2.702434655 | 1.623303071  | 9.128083174  |
| H  | 12.543288891 | 2.692827971  | 11.262732337 | H | 2.493372599 | 2.636525099  | 8.777323326  |
|    |              |              |              | H | 1.872137559 | 1.329268378  | 9.781076257  |



|   |              |              |              |    |              |              |              |
|---|--------------|--------------|--------------|----|--------------|--------------|--------------|
| H | 11.545728000 | 4.267228000  | 9.660193000  | H  | 8.047090000  | -2.553529000 | 8.064588000  |
| H | 10.429239000 | 5.625330000  | 9.836830000  | C  | 7.677022000  | -4.248640000 | 9.364421000  |
| H | 10.176478000 | 4.433972000  | 8.556324000  | H  | 7.810598000  | -5.010664000 | 8.607545000  |
| C | 10.039680000 | 3.907786000  | 12.557682000 | C  | 7.367423000  | -4.573403000 | 10.686524000 |
| H | 9.377215000  | 3.488413000  | 13.322198000 | H  | 7.223535000  | -5.604916000 | 10.993857000 |
| H | 10.051934000 | 4.994567000  | 12.703209000 | U  | 6.941030000  | -4.342719000 | 14.156963000 |
| H | 11.052464000 | 3.546595000  | 12.749591000 | Si | 3.873638000  | -4.597520000 | 12.725737000 |
| C | 7.681799000  | 4.403980000  | 10.763002000 | Si | 5.153651000  | -7.309222000 | 12.758056000 |
| H | 7.511542000  | 4.896655000  | 9.803350000  | Si | 5.127942000  | -3.859631000 | 17.258036000 |
| H | 7.643894000  | 5.179276000  | 11.536125000 | Si | 7.965639000  | -2.859704000 | 17.246554000 |
| H | 6.850374000  | 3.715396000  | 10.932648000 | Si | 9.079731000  | -6.795619000 | 15.428710000 |
| C | 10.654843000 | 1.521551000  | 7.098003000  | Si | 10.307536000 | -5.187609000 | 13.193342000 |
| H | 10.316321000 | 2.450063000  | 6.626764000  | N  | 5.312945000  | -5.566101000 | 13.191958000 |
| H | 11.711820000 | 1.390295000  | 6.839630000  | N  | 6.645733000  | -3.643911000 | 16.295729000 |
| H | 10.584450000 | 1.659984000  | 8.178447000  | N  | 8.859639000  | -5.476321000 | 14.221022000 |
| C | 10.648327000 | -1.552943000 | 6.483894000  | C  | 3.995761000  | -2.912708000 | 13.608318000 |
| H | 10.696853000 | -1.986156000 | 7.485678000  | H  | 4.420012000  | -2.148940000 | 12.955838000 |
| H | 11.676393000 | -1.378124000 | 6.146831000  | H  | 2.974837000  | -2.601703000 | 13.856731000 |
| H | 10.212781000 | -2.302276000 | 5.816090000  | H  | 4.539004000  | -2.895968000 | 14.560232000 |
| C | 9.533998000  | 0.477891000  | 4.541970000  | C  | 2.216617000  | -5.364086000 | 13.236357000 |
| H | 9.130742000  | -0.332219000 | 3.929628000  | H  | 2.158177000  | -5.577414000 | 14.306519000 |
| H | 10.557638000 | 0.664466000  | 4.194479000  | H  | 1.427167000  | -4.641609000 | 12.997049000 |
| H | 8.954132000  | 1.383640000  | 4.345433000  | H  | 1.986453000  | -6.283208000 | 12.691607000 |
| C | 6.259494000  | 0.243699000  | 4.758932000  | C  | 3.742745000  | -4.188056000 | 10.878641000 |
| H | 6.358632000  | 1.312757000  | 4.952695000  | H  | 3.542192000  | -5.062685000 | 10.257085000 |
| H | 5.207934000  | 0.043894000  | 4.525659000  | H  | 2.907227000  | -3.490977000 | 10.744655000 |
| H | 6.840568000  | 0.009754000  | 3.863850000  | H  | 4.643245000  | -3.696667000 | 10.501838000 |
| C | 7.322499000  | -2.490141000 | 5.419641000  | C  | 4.137133000  | -8.272272000 | 14.033850000 |
| H | 8.119075000  | -2.361192000 | 4.681903000  | H  | 3.096763000  | -7.941477000 | 14.077495000 |
| H | 6.446727000  | -2.870595000 | 4.879671000  | H  | 4.137654000  | -9.333033000 | 13.757374000 |
| H | 7.634149000  | -3.274546000 | 6.114637000  | H  | 4.555793000  | -8.194148000 | 15.041228000 |
| C | 5.269920000  | -1.230315000 | 7.272897000  | C  | 4.344601000  | -7.575409000 | 11.058095000 |
| H | 5.439360000  | -2.029160000 | 8.000690000  | H  | 4.894070000  | -7.081752000 | 10.250397000 |
| H | 4.476588000  | -1.573207000 | 6.598830000  | H  | 4.363519000  | -8.652474000 | 10.854341000 |
| H | 4.894465000  | -0.349399000 | 7.799707000  | H  | 3.300382000  | -7.258304000 | 11.004434000 |
| C | 4.878260000  | 4.692817000  | 8.635500000  | C  | 6.839590000  | -8.157766000 | 12.644918000 |
| H | 3.815569000  | 4.582668000  | 8.872608000  | H  | 7.203489000  | -8.429333000 | 13.636446000 |
| H | 4.947901000  | 5.447681000  | 7.842784000  | H  | 6.717196000  | -9.087765000 | 12.078459000 |
| H | 5.385743000  | 5.085135000  | 9.517289000  | H  | 7.616289000  | -7.566536000 | 12.153043000 |
| C | 7.318425000  | 3.401942000  | 7.214869000  | C  | 4.116666000  | -5.314244000 | 16.585017000 |
| H | 8.097167000  | 3.586577000  | 7.961473000  | H  | 4.487743000  | -6.249810000 | 17.014792000 |
| H | 7.264584000  | 4.299813000  | 6.588563000  | H  | 3.074325000  | -5.196810000 | 16.902231000 |
| H | 7.639935000  | 2.574300000  | 6.576724000  | H  | 4.128268000  | -5.426334000 | 15.499251000 |
| C | 4.439611000  | 2.624040000  | 6.513295000  | C  | 4.071083000  | -2.279662000 | 17.263865000 |
| H | 4.781599000  | 3.130487000  | 5.603595000  | H  | 3.744721000  | -1.951211000 | 16.274496000 |
| H | 3.421267000  | 2.968208000  | 6.710089000  | H  | 3.169787000  | -2.467266000 | 17.859080000 |
| H | 4.397307000  | 1.555161000  | 6.300102000  | H  | 4.603495000  | -1.449507000 | 17.736912000 |
| C | 4.126680000  | 2.709389000  | 11.597824000 | C  | 5.395856000  | -4.288811000 | 19.086854000 |
| H | 4.952230000  | 2.637481000  | 12.311518000 | H  | 5.806847000  | -3.470002000 | 19.682405000 |
| H | 3.202764000  | 2.489955000  | 12.145744000 | H  | 4.406749000  | -4.522078000 | 19.499796000 |
| H | 4.068704000  | 3.745533000  | 11.254154000 | H  | 6.025185000  | -5.171102000 | 19.230971000 |
| C | 4.277044000  | -0.265007000 | 10.890188000 | C  | 8.616041000  | -3.916525000 | 18.685145000 |
| H | 4.827455000  | -1.001973000 | 10.298667000 | H  | 8.505503000  | -4.989405000 | 18.520794000 |
| H | 3.237068000  | -0.605078000 | 10.933937000 | H  | 9.681814000  | -3.711058000 | 18.834179000 |
| H | 4.665697000  | -0.269517000 | 11.910378000 | H  | 8.103424000  | -3.665099000 | 19.616639000 |
| C | 2.693299000  | 1.619525000  | 9.143640000  | C  | 7.462241000  | -1.210048000 | 18.056085000 |
| H | 2.484019000  | 2.630835000  | 8.787693000  | H  | 6.692924000  | -1.338643000 | 18.822542000 |
| H | 1.865644000  | 1.330829000  | 9.802399000  | H  | 8.353584000  | -0.818452000 | 18.561386000 |
| H | 2.683499000  | 0.944322000  | 8.283694000  | H  | 7.121781000  | -0.434745000 | 17.364453000 |
| N | 7.234244000  | -3.654559000 | 11.635953000 | C  | 9.432149000  | -2.464962000 | 16.107510000 |
| N | 7.609884000  | -1.929699000 | 9.966900000  | H  | 9.209291000  | -1.703831000 | 15.354316000 |
| C | 7.356344000  | -2.339389000 | 11.258296000 | H  | 10.240920000 | -2.068933000 | 16.732406000 |
| C | 7.796396000  | -2.893235000 | 9.063348000  | H  | 9.815373000  | -3.356351000 | 15.604094000 |

|   |              |              |              |   |              |              |              |
|---|--------------|--------------|--------------|---|--------------|--------------|--------------|
| C | 9.767796000  | -8.411951000 | 14.706334000 | C | 10.404267000 | -6.389202000 | 11.730325000 |
| H | 10.827532000 | -8.306837000 | 14.453653000 | H | 9.555332000  | -6.295328000 | 11.047464000 |
| H | 9.705245000  | -9.178066000 | 15.488774000 | H | 11.311555000 | -6.177043000 | 11.152632000 |
| H | 9.245686000  | -8.789197000 | 13.826396000 | H | 10.458628000 | -7.429744000 | 12.060909000 |
| C | 7.378680000  | -7.107110000 | 16.218601000 | C | 10.309258000 | -3.416828000 | 12.498847000 |
| H | 6.547640000  | -7.140275000 | 15.505280000 | H | 9.739852000  | -2.703974000 | 13.101349000 |
| H | 7.392408000  | -8.079337000 | 16.724075000 | H | 11.344512000 | -3.060544000 | 12.487911000 |
| H | 7.153968000  | -6.345256000 | 16.969484000 | H | 9.939505000  | -3.380405000 | 11.472061000 |
| C | 10.285266000 | -6.369375000 | 16.832334000 | C | 11.944696000 | -5.349014000 | 14.138917000 |
| H | 9.977302000  | -6.895912000 | 17.742975000 | H | 12.159827000 | -6.366717000 | 14.472734000 |
| H | 11.299171000 | -6.700507000 | 16.595042000 | H | 12.748142000 | -5.058342000 | 13.451500000 |
| H | 10.325211000 | -5.304192000 | 17.064239000 | H | 11.996449000 | -4.686206000 | 15.007183000 |

## References

- (1) R. A. Andersen, *Inorg. Chem.* 1979, **18**, 1507–1509.
- (2) D. E. Bergbreiter and J. M. Killough, *J. Am. Chem. Soc.* 1978, **100**, 2126–2134.
- (3) D. K. Modder, C. T. Palumbo, I. Douair, F. Fadaei-Tirani, L. Maron and M. Mazzanti, *Angew. Chem. Int. Ed.* 2021, **60**, 3737–3744.
- (4) G. A. Bain and J. F. Berry, *J. Chem. Educ.* 2008, **85**, 532–536.
- (5) D. Gatteschi, R. Sessoli and J. Villain, *Molecular Nanomagnets*, Oxford University Press, Oxford, **2006**.
- (6) **CrysAlisPro** (Rigaku, V1.171.41.118a, 2021)
- (7) G. M. Sheldrick, ShelXT-Integrated space-group and crystal-structure determination, *Acta Cryst.* 2015, **A71**, 3–8.
- (8) O. V. Dolomanov, L. J. Bourhis, R. J. Gildea, J. A. K. Howard and H. Puschmann, Olex2: A complete structure solution, refinement and analysis program, *J. Appl. Cryst.* 2009, **42**, 339–341.
- (9) G. M. Sheldrick, Crystal structure refinement with ShelXL, *Acta Cryst.* 2015, **C71**, 3–8.
- (10) D. J. Berg, J. M. Boncella and R. A. Andersen, *Organometallics* 2002, **21**, 4622–4631.
- (11) S. Demir, J. M. Zadrozny, M. Nippe and J. R. Long, *J. Am. Chem. Soc.* 2012, **134**, 18546–18549.
- (12) Gaussian 16, Revision B.01, M. J. Frisch, G. W. Trucks, H. B. Schlegel, G. E. Scuseria, M. A. Robb, J. R. Cheeseman, G. Scalmani, V. Barone, G. A. Petersson, H. Nakatsuji, X. Li, M. Caricato, A. V. Marenich, J. Bloino, B. G. Janesko, R. Gomperts, B. Mennucci, H. P. Hratchian, J. V. Ortiz, A. F. Izmaylov, J. L. Sonnenberg, D. Williams-Young, F. Ding, F. Lipparini, F. Egidi, J. Goings, B. Peng, A. Petrone, T. Henderson, D. Ranasinghe, V. G. Zakrzewski, J. Gao, N. Rega, G. Zheng, W. Liang, M. Hada, M. Ehara, K. Toyota, R. Fukuda, J. Hasegawa, M. Ishida, T. Nakajima, Y. Honda, O. Kitao, H. Nakai, T. Vreven, K. Throssell, J. A. Montgomery, Jr., J. E. Peralta, F. Ogliaro, M. J. Bearpark, J. J. Heyd, E. N. Brothers, K. N. Kudin, V. N. Staroverov, T. A. Keith, R. Kobayashi, J. Normand, K. Raghavachari, A. P. Rendell, J. C. Burant, S. S. Iyengar, J. Tomasi, M. Cossi, J. M. Millam, M. Klene, C. Adamo, R. Cammi, J. W. Ochterski, R. L. Martin, K. Morokuma, O. Farkas, J. B. Foresman, and D. J. Fox, Gaussian, Inc., Wallingford CT, 2016.
- (13) (a) A. D. Becke, *J. Chem. Phys.* 1993, **98**, 5648–5652; (b) K. Burke, K., J. P. Perdew and W. Yang, W. in *Electronic Density Functional Theory: Recent Progress and New Directions*, Eds: J. F. Dobson, G. Vignale, M. P. Das, Plenum: New York, 1998.
- (14) (a) A. Moritz, X. Cao and M. Dolg, *Theor. Chem. Acc.* 2007, **118**, 845–854; (b) A. Hollwarth, M. Bohme, S. Dapprich, A. W. Ehlers, A. Gobbi, V. Jonas, K. F. Kohler, R. Stegmann, A. Veldkamp and G. Frenking *Chem. Phys. Lett.* 1993, **208**, 237–240.
- (15) (a) P. C. Hariharan and J. A. Pople, *Theor. Chim. Acta* 1973, **28**, 213–222; (b) W. J. Hehre, R. Ditchfield and J. A. Pople, *J. Chem. Phys.* 1972, **56**, 2257–2261.
